# Supplementary material for: Associations between type 1 diabetes and pulmonary tuberculosis: a bidirectional mendelian randomization study
Source: Springer Nature journal article supplement (doi:10.1186/s13098-024-01296-x), 2024-03-05
Supplement: MOESM1 [file 26820272]

**Table S1. Excluded SNPs of Potential confounders.**

| Exposures  | Exclude SNPs                                                          | Traits                                                                                                                                                                                                 |
|------------|-----------------------------------------------------------------------|--------------------------------------------------------------------------------------------------------------------------------------------------------------------------------------------------------|
| T1DM       | rs4490209                                                             | Hemoglobin concentration; Mean corpuscular hemoglobin; Mean corpuscular volume                                                                                                                         |
|            | rs12464462                                                            | Mean corpuscular hemoglobin; Mean corpuscular volume                                                                                                                                                   |
|            | rs2429557                                                             | Mean corpuscular hemoglobin concentration                                                                                                                                                              |
|            | rs9385401                                                             | Hemoglobin concentration                                                                                                                                                                               |
|            | rs3802214                                                             | Mean corpuscular hemoglobin                                                                                                                                                                            |
|            | rs1701704                                                             | Alcohol intake frequency                                                                                                                                                                               |
|            | rs3184504                                                             | Hemoglobin Hb; Ever smoked; Smoking status: previous; Past tobacco smoking;                                                                                                                            |
|            | rs35327136                                                            | Hemoglobin concentration; Alcohol intake frequency                                                                                                                                                     |
|            | rs601338                                                              | Alcohol intake frequency; Alcohol intake versus 10 years previously                                                                                                                                    |
| FBG        | rs1260326                                                             | Hemoglobin concentration; Mean corpuscular hemoglobin concentration; Alcohol consumption; Alcohol consumption in current drinkers; Alcohol intake frequency; Alcohol intake versus 10 years previously |
|            | rs11715915                                                            | Mean corpuscular hemoglobin; Mean corpuscular volume                                                                                                                                                   |
|            | rs174576                                                              | Hemoglobin concentration; Mean corpuscular volume                                                                                                                                                      |
| HAb1c      | rs695238                                                              | Alcohol intake frequency; Alcohol intake versus 10 years previously; Exposure to tobacco smoke at home                                                                                                 |
|            | rs1991431                                                             | Mean corpuscular hemoglobin                                                                                                                                                                            |
|            | rs6902771                                                             | Alcohol dependence; Alcohol dependence; Alcoholism                                                                                                                                                     |
|            | rs3734537                                                             | Hemoglobin concentration; Mean corpuscular hemoglobin                                                                                                                                                  |
|            | rs3757230                                                             | Mean corpuscular hemoglobin                                                                                                                                                                            |
|            | rs9379084                                                             | Hemoglobin concentration                                                                                                                                                                               |
|            | rs1490384                                                             | Hemoglobin concentration                                                                                                                                                                               |
|            | rs28846812                                                            | Hemoglobin concentration                                                                                                                                                                               |
|            | rs71276225                                                            | Hemoglobin concentration                                                                                                                                                                               |
|            | rs12677543                                                            | Mean corpuscular hemoglobin                                                                                                                                                                            |
|            | rs28446901                                                            | Hemoglobin concentration                                                                                                                                                                               |
|            | rs7870193                                                             | Hemoglobin concentration                                                                                                                                                                               |
|            | rs3138499                                                             | Pack years adult smoking as proportion of life span exposed to smoking; Pack years of smoking preview only                                                                                             |
|            | rs12413039                                                            | Nicotine dependence smoking smoking cessation                                                                                                                                                          |
|            | rs7124681                                                             | Alcohol intake frequency                                                                                                                                                                               |
|            | rs588713                                                              | Alcohol usually taken with meals                                                                                                                                                                       |
|            | rs7952436                                                             | Mean corpuscular hemoglobin                                                                                                                                                                            |
|            | rs7968682                                                             | Alcohol intake frequency                                                                                                                                                                               |
|            | rs1701704                                                             | Alcohol intake frequency                                                                                                                                                                               |
|            | rs1046276                                                             | Mean corpuscular hemoglobin                                                                                                                                                                            |
| rs3790076  | Past tobacco smoking                                                  |                                                                                                                                                                                                        |
| rs11645303 | Hemoglobin concentration; Mean corpuscular hemoglobin concentration   |                                                                                                                                                                                                        |
| rs78378222 | Mean corpuscular hemoglobin                                           |                                                                                                                                                                                                        |
| rs73984689 | Hemoglobin concentration; Mean corpuscular hemoglobin; Alcohol intake |                                                                                                                                                                                                        |

|       |             |                                                                                                                                                                                                               |
|-------|-------------|---------------------------------------------------------------------------------------------------------------------------------------------------------------------------------------------------------------|
|       |             | frequency                                                                                                                                                                                                     |
|       | rs1680331   | Alcohol intake frequency                                                                                                                                                                                      |
|       | rs12721051  | Mean corpuscular hemoglobin concentration                                                                                                                                                                     |
|       | rs72976986  | Mean corpuscular hemoglobin                                                                                                                                                                                   |
|       | rs3761123   | Current tobacco smoking; Smoking status: current                                                                                                                                                              |
|       | rs6088619   | Difficulty not smoking for 1 day                                                                                                                                                                              |
|       | rs45577732  | Current tobacco smoking; Pack years adult smoking as proportion of life span exposed to smoking; Pack years of smoking preview only; Smoking status: current                                                  |
|       | rs11909473  | Hemoglobin concentration                                                                                                                                                                                      |
|       | rs41281623  | Mean corpuscular hemoglobin                                                                                                                                                                                   |
| FI    | rs13389219  | Hemoglobin concentration; Mean corpuscular hemoglobin concentration                                                                                                                                           |
|       | rs1260326   | Hemoglobin concentration; Mean corpuscular hemoglobin concentration; Alcohol consumption; Alcohol consumption in current drinkers; Alcohol intake frequency; Alcohol intake versus 10 years previously        |
|       | rs35000407  | Mean corpuscular hemoglobin concentration                                                                                                                                                                     |
|       | rs62271373  | Alcohol intake frequency                                                                                                                                                                                      |
|       | rs10865959  | Alcohol intake frequency; Alcohol intake versus 10 years previously                                                                                                                                           |
|       | rs3775380   | Hemoglobin concentration                                                                                                                                                                                      |
|       | rs9884482   | Alcohol intake frequency                                                                                                                                                                                      |
|       | rs459193    | Hemoglobin concentration                                                                                                                                                                                      |
|       | rs1474696   | Hemoglobin concentration                                                                                                                                                                                      |
|       | rs116141873 | Mean corpuscular hemoglobin                                                                                                                                                                                   |
|       | rs6905288   | Hemoglobin concentration                                                                                                                                                                                      |
|       | rs75179845  | Hemoglobin concentration; Mean corpuscular hemoglobin; Mean corpuscular hemoglobin concentration                                                                                                              |
|       | rs1351394   | Alcohol intake frequency                                                                                                                                                                                      |
| LDL-C | rs10903129  | Mean corpuscular hemoglobin concentration; Nicotine dependence smoking ever smokers versus never smokers                                                                                                      |
|       | rs10195252  | Hemoglobin concentration                                                                                                                                                                                      |
|       | rs17404153  | Mean corpuscular hemoglobin                                                                                                                                                                                   |
|       | rs9875338   | Mean corpuscular hemoglobin concentration                                                                                                                                                                     |
|       | rs3757354   | Mean corpuscular hemoglobin                                                                                                                                                                                   |
|       | rs1408272   | Hemoglobin concentration; Mean corpuscular hemoglobin; Mean corpuscular hemoglobin concentration; Hemoglobin Hb; Mean cell hemoglobin MCH; Mean cell hemoglobin MCH Mean cell volume Hemoglobin Hgb Mean cell |
|       | rs13206249  | Mean corpuscular hemoglobin                                                                                                                                                                                   |
|       | rs9987289   | Hemoglobin concentration                                                                                                                                                                                      |
|       | rs2954029   | Mean corpuscular hemoglobin                                                                                                                                                                                   |
|       | rs579459    | Hemoglobin concentration; Hemoglobin Hb                                                                                                                                                                       |
|       | rs174583    | Hemoglobin concentration                                                                                                                                                                                      |
|       | rs964184    | Mean corpuscular hemoglobin concentration                                                                                                                                                                     |
|       | rs3184504   | Hemoglobin concentration; Ever smoked; Past tobacco smoking; Smoking status:                                                                                                                                  |

|       |            |                                                                                                                    |
|-------|------------|--------------------------------------------------------------------------------------------------------------------|
|       |            | previous                                                                                                           |
|       | rs2886232  | Hemoglobin concentration                                                                                           |
|       | rs676388   | Alcohol intake frequency; Alcohol intake versus 10 years previously                                                |
|       | rs6065311  | Hemoglobin concentration                                                                                           |
|       | rs1800961  | Hemoglobin concentration                                                                                           |
| HDL-C | rs4660293  | Mean corpuscular hemoglobin; Alcohol intake versus 10 years previously                                             |
|       | rs1047891  | Mean corpuscular hemoglobin                                                                                        |
|       | rs7607980  | Hemoglobin concentration                                                                                           |
|       | rs2013208  | Alcohol intake frequency; Alcohol intake versus 10 years previously                                                |
|       | rs3822072  | Hemoglobin concentration                                                                                           |
|       | rs13107325 | Hemoglobin concentration; Alcohol intake frequency                                                                 |
|       | rs998584   | Hemoglobin concentration                                                                                           |
|       | rs1936800  | Hemoglobin concentration                                                                                           |
|       | rs3861397  | Mean corpuscular hemoglobin                                                                                        |
|       | rs1980493  | Hemoglobin concentration                                                                                           |
|       | rs17145738 | Alcohol intake frequency                                                                                           |
|       | rs4240624  | Hemoglobin concentration                                                                                           |
|       | rs2293889  | Hemoglobin concentration                                                                                           |
|       | rs10808546 | Mean corpuscular hemoglobin                                                                                        |
|       | rs10761771 | Alcohol usually taken with meals                                                                                   |
|       | rs970548   | Mean corpuscular hemoglobin                                                                                        |
|       | rs964184   | Mean corpuscular hemoglobin concentration                                                                          |
|       | rs102275   | Hemoglobin concentration                                                                                           |
|       | rs499974   | Hemoglobin concentration                                                                                           |
|       | rs12801636 | Mean corpuscular hemoglobin                                                                                        |
|       | rs11065987 | Hemoglobin concentration; Ever smoked; Past tobacco smoking; Smoking status: previous                              |
|       | rs10468017 | Hemoglobin Hb                                                                                                      |
|       | rs492571   | Hemoglobin concentration; Mean corpuscular hemoglobin                                                              |
|       | rs16942887 | Hemoglobin concentration                                                                                           |
|       | rs1877031  | Mean corpuscular hemoglobin                                                                                        |
|       | rs4969178  | Hemoglobin Hb                                                                                                      |
|       | rs6567160  | Alcohol intake frequency                                                                                           |
|       | rs4465830  | Mean corpuscular hemoglobin                                                                                        |
|       | rs181360   | Mean corpuscular hemoglobin                                                                                        |
| TG    | rs17513135 | Alcohol intake versus 10 years previously; Mean corpuscular hemoglobin                                             |
|       | rs1321257  | Hemoglobin concentration                                                                                           |
|       | rs1260326  | Hemoglobin concentration; Alcohol consumption; Alcohol intake frequency; Alcohol intake versus 10 years previously |
|       | rs13389219 | Hemoglobin concentration; Mean corpuscular hemoglobin concentration                                                |
|       | rs442177   | Hemoglobin concentration                                                                                           |
|       | rs9686661  | Hemoglobin concentration; Mean corpuscular hemoglobin concentration                                                |
|       | rs634869   | Mean corpuscular hemoglobin                                                                                        |

|     |            |                                                                                                          |
|-----|------------|----------------------------------------------------------------------------------------------------------|
|     | rs2239520  | Hemoglobin concentration; Mean corpuscular hemoglobin concentration                                      |
|     | rs998584   | Hemoglobin concentration                                                                                 |
|     | rs719726   | Hemoglobin concentration                                                                                 |
|     | rs2247056  | Mean corpuscular hemoglobin; HIV 1 control; HIV 1 control viral load at set point                        |
|     | rs11974409 | Alcohol intake frequency                                                                                 |
|     | rs12678919 | Mean corpuscular hemoglobin concentration                                                                |
|     | rs2954022  | Mean corpuscular hemoglobin                                                                              |
|     | rs1832007  | Hemoglobin concentration                                                                                 |
|     | rs10761762 | Alcohol usually taken with meals                                                                         |
|     | rs7350481  | Mean corpuscular hemoglobin concentration                                                                |
|     | rs588136   | Hemoglobin concentration                                                                                 |
|     | rs16948098 | Hemoglobin concentration                                                                                 |
|     | rs749671   | Mean corpuscular hemoglobin; Alcohol intake frequency                                                    |
|     | rs439401   | Mean corpuscular hemoglobin concentration                                                                |
|     | rs4810479  | Mean corpuscular hemoglobin                                                                              |
| TC  | rs11802413 | Mean corpuscular hemoglobin concentration; Nicotine dependence smoking ever smokers versus never smokers |
|     | rs2287623  | Mean corpuscular hemoglobin concentration                                                                |
|     | rs780093   | Hemoglobin concentration; Alcohol intake frequency; Alcohol intake versus 10 years previously            |
|     | rs7616006  | Mean corpuscular hemoglobin concentration                                                                |
|     | rs3757354  | Mean corpuscular hemoglobin                                                                              |
|     | rs9272775  | Hemoglobin concentration                                                                                 |
|     | rs1800562  | Hemoglobin concentration; Mean corpuscular hemoglobin                                                    |
|     | rs9391858  | HIV 1 control; HIV 1 disease progression                                                                 |
|     | rs9376090  | Hemoglobin concentration; Mean corpuscular hemoglobin                                                    |
|     | rs9987289  | Hemoglobin concentration                                                                                 |
|     | rs2954029  | Mean corpuscular hemoglobin                                                                              |
|     | rs579459   | Hemoglobin concentration                                                                                 |
|     | rs10900221 | Mean corpuscular hemoglobin                                                                              |
|     | rs1535     | Hemoglobin concentration                                                                                 |
|     | rs4752805  | Hemoglobin concentration                                                                                 |
|     | rs964184   | Mean corpuscular hemoglobin concentration                                                                |
|     | rs3184504  | Hemoglobin concentration; Ever smoked; Past tobacco smoking; Smoking status: previous                    |
|     | rs2244608  | Hemoglobin concentration                                                                                 |
|     | rs10468017 | Hemoglobin Hb                                                                                            |
|     | rs2886232  | Hemoglobin concentration                                                                                 |
|     | rs1800961  | Hemoglobin concentration                                                                                 |
|     | rs2235367  | Hemoglobin concentration                                                                                 |
|     | rs181360   | Mean corpuscular hemoglobin                                                                              |
| BMI | rs3101336  | Alcohol intake versus 10 years previously                                                                |

|     |            |                                                       |
|-----|------------|-------------------------------------------------------|
|     | rs6656785  | Past tobacco smoking                                  |
|     | rs13021737 | Past tobacco smoking                                  |
|     | rs13078960 | Ever smoked                                           |
|     | rs13107325 | Hemoglobin concentration; Alcohol intake frequency    |
|     | rs3817334  | Alcohol intake frequency                              |
|     | rs11030104 | Ever smoked                                           |
|     | rs3888190  | Mean corpuscular hemoglobin; Alcohol intake frequency |
|     | rs4889606  | Mean corpuscular hemoglobin; Alcohol intake frequency |
|     | rs1558902  | Alcohol intake frequency                              |
|     | rs1808579  | Alcohol intake frequency                              |
|     | rs6567160  | Alcohol intake frequency                              |
| WHR | rs1128249  | Hemoglobin concentration                              |
|     | rs2972164  | Mean corpuscular hemoglobin concentration             |
|     | rs17451107 | Mean corpuscular hemoglobin concentration             |
|     | rs459193   | Hemoglobin concentration                              |
|     | rs9491696  | Hemoglobin concentration                              |
|     | rs998584   | Hemoglobin concentration                              |
|     | rs17109256 | Alcohol intake frequency                              |
|     | rs1121980  | Alcohol intake frequency                              |
|     | rs11663816 | Alcohol intake frequency                              |
|     | rs3786897  | Mean corpuscular hemoglobin                           |

T1DM, type 1 diabetes; FBG, fasting blood glucose; HbA1c, glycosylated hemoglobin; FI, fasting insulin; LDL-C, low-density lipoprotein cholesterol; HDL-C, high-density lipoprotein cholesterol; TG, triglycerides; TC, total cholesterol; BMI, body mass index; WHR, waist-to-hip ratio.

**Table S1. Published associations of T1DM on PTB**

| SNP         | Exposure | EA | OA | GX     | GX(SE) | pval      | F    | GY     | GY(SE) | pval  |
|-------------|----------|----|----|--------|--------|-----------|------|--------|--------|-------|
| rs10224046  | T1DM     | G  | T  | 0.086  | 0.015  | 2.71E-08  | 31   | 0.026  | 0.035  | 0.460 |
| rs10275896  | T1DM     | C  | T  | -0.121 | 0.017  | 2.60E-13  | 53   | 0.084  | 0.043  | 0.050 |
| rs1050979   | T1DM     | G  | A  | 0.106  | 0.014  | 5.65E-14  | 56   | -0.012 | 0.034  | 0.710 |
| rs10751776  | T1DM     | C  | A  | 0.078  | 0.014  | 2.67E-08  | 31   | 0.007  | 0.034  | 0.845 |
| rs10801128  | T1DM     | G  | A  | 0.096  | 0.016  | 8.98E-10  | 38   | 0.041  | 0.039  | 0.288 |
| rs10844597  | T1DM     | A  | G  | -0.090 | 0.014  | 1.20E-10  | 41   | -0.047 | 0.034  | 0.159 |
| rs11203203  | T1DM     | A  | G  | 0.144  | 0.014  | 1.81E-23  | 100  | -0.024 | 0.037  | 0.517 |
| rs112733823 | T1DM     | T  | C  | 0.383  | 0.020  | 7.42E-81  | 363  | 0.065  | 0.041  | 0.112 |
| rs114378220 | T1DM     | T  | C  | 0.178  | 0.030  | 5.11E-09  | 34   | -0.133 | 0.072  | 0.067 |
| rs12128789  | T1DM     | C  | T  | 0.127  | 0.022  | 3.73E-09  | 35   | 0.070  | 0.053  | 0.182 |
| rs12257077  | T1DM     | T  | C  | 0.231  | 0.037  | 3.91E-10  | 39   | -0.029 | 0.128  | 0.823 |
| rs12644686  | T1DM     | G  | C  | -0.108 | 0.019  | 2.44E-08  | 31   | 0.069  | 0.039  | 0.076 |
| rs12742756  | T1DM     | G  | A  | -0.083 | 0.015  | 3.54E-08  | 30   | 0.036  | 0.034  | 0.284 |
| rs12927355  | T1DM     | T  | C  | -0.204 | 0.015  | 4.41E-41  | 180  | 0.055  | 0.037  | 0.133 |
| rs13147049  | T1DM     | G  | A  | -0.110 | 0.015  | 8.92E-14  | 56   | -0.016 | 0.034  | 0.632 |
| rs13259300  | T1DM     | C  | A  | -0.092 | 0.015  | 3.28E-10  | 39   | -0.031 | 0.034  | 0.368 |
| rs1350275   | T1DM     | G  | T  | -0.094 | 0.015  | 8.86E-10  | 38   | -0.014 | 0.035  | 0.693 |
| rs1574285   | T1DM     | T  | G  | -0.127 | 0.014  | 4.27E-19  | 80   | -0.061 | 0.034  | 0.073 |
| rs1611236   | T1DM     | A  | G  | -0.260 | 0.017  | 1.83E-50  | 223  | -0.063 | 0.040  | 0.118 |
| rs17106304  | T1DM     | G  | C  | 0.115  | 0.015  | 6.83E-15  | 61   | -0.019 | 0.035  | 0.593 |
| rs17323934  | T1DM     | G  | C  | -0.130 | 0.017  | 1.26E-14  | 59   | 0.091  | 0.043  | 0.036 |
| rs17623914  | T1DM     | C  | T  | -0.135 | 0.023  | 7.97E-09  | 33   | -0.073 | 0.065  | 0.263 |
| rs1881146   | T1DM     | T  | A  | -0.095 | 0.017  | 4.57E-08  | 30   | 0.012  | 0.038  | 0.751 |
| rs1947178   | T1DM     | G  | A  | -0.103 | 0.017  | 1.67E-09  | 36   | -0.094 | 0.047  | 0.047 |
| rs202535    | T1DM     | A  | C  | -0.141 | 0.018  | 1.79E-14  | 59   | 0.029  | 0.041  | 0.480 |
| rs2111485   | T1DM     | G  | A  | 0.128  | 0.014  | 1.05E-18  | 78   | 0.002  | 0.034  | 0.957 |
| rs2188962   | T1DM     | T  | C  | 0.079  | 0.014  | 1.73E-08  | 32   | -0.064 | 0.036  | 0.078 |
| rs229527    | T1DM     | A  | C  | 0.104  | 0.014  | 1.82E-13  | 54   | -0.011 | 0.034  | 0.740 |
| rs231972    | T1DM     | C  | A  | 0.171  | 0.021  | 5.12E-16  | 66   | 0.037  | 0.059  | 0.527 |
| rs238265    | T1DM     | G  | T  | -0.091 | 0.015  | 2.08E-09  | 36   | -0.017 | 0.036  | 0.636 |
| rs238873    | T1DM     | G  | A  | 0.793  | 0.053  | 4.30E-50  | 221  | -0.160 | 0.134  | 0.233 |
| rs2493411   | T1DM     | C  | T  | 0.127  | 0.022  | 1.28E-08  | 32   | 0.010  | 0.045  | 0.826 |
| rs2543537   | T1DM     | T  | C  | -0.083 | 0.014  | 5.59E-09  | 34   | 0.024  | 0.034  | 0.471 |
| rs2611211   | T1DM     | T  | C  | -0.144 | 0.019  | 1.39E-14  | 59   | -0.031 | 0.039  | 0.431 |
| rs28752526  | T1DM     | G  | A  | 0.630  | 0.016  | 1.00E-200 | 1570 | 0.121  | 0.036  | 0.001 |
| rs3024493   | T1DM     | A  | C  | -0.164 | 0.020  | 7.26E-17  | 70   | 0.087  | 0.046  | 0.061 |
| rs3087243   | T1DM     | A  | G  | -0.199 | 0.014  | 1.16E-44  | 197  | -0.028 | 0.036  | 0.440 |
| rs3135348   | T1DM     | G  | A  | 1.048  | 0.017  | 1.00E-200 | 3610 | 0.075  | 0.034  | 0.026 |
| rs34536443  | T1DM     | C  | G  | -0.385 | 0.039  | 1.47E-23  | 100  | -0.106 | 0.098  | 0.280 |

|            |      |   |   |        |       |           |      |        |       |       |
|------------|------|---|---|--------|-------|-----------|------|--------|-------|-------|
| rs34593439 | T1DM | A | G | -0.218 | 0.024 | 1.54E-19  | 82   | 0.011  | 0.050 | 0.829 |
| rs41295159 | T1DM | G | C | -0.700 | 0.090 | 9.11E-15  | 60   | 0.142  | 0.410 | 0.729 |
| rs4548024  | T1DM | C | T | -0.096 | 0.017 | 9.95E-09  | 33   | -0.064 | 0.041 | 0.117 |
| rs4820827  | T1DM | C | T | -0.130 | 0.014 | 1.01E-19  | 83   | 0.021  | 0.036 | 0.566 |
| rs55893453 | T1DM | G | A | 0.095  | 0.017 | 4.63E-08  | 30   | -0.016 | 0.046 | 0.728 |
| rs55993634 | T1DM | G | C | 0.219  | 0.024 | 2.29E-19  | 81   | 0.015  | 0.060 | 0.803 |
| rs56994090 | T1DM | C | T | -0.134 | 0.015 | 3.60E-20  | 85   | -0.036 | 0.034 | 0.283 |
| rs57209021 | T1DM | T | C | 0.101  | 0.018 | 3.73E-08  | 30   | -0.037 | 0.041 | 0.366 |
| rs574384   | T1DM | A | C | -0.134 | 0.024 | 2.20E-08  | 31   | -0.052 | 0.051 | 0.303 |
| rs607703   | T1DM | T | C | 0.092  | 0.014 | 1.17E-10  | 42   | -0.022 | 0.034 | 0.522 |
| rs61759532 | T1DM | T | C | 0.118  | 0.019 | 1.91E-10  | 41   | 0.076  | 0.043 | 0.078 |
| rs61839660 | T1DM | T | C | -0.357 | 0.026 | 5.25E-43  | 189  | 0.133  | 0.085 | 0.116 |
| rs6434435  | T1DM | A | G | -0.123 | 0.019 | 1.23E-10  | 41   | 0.073  | 0.055 | 0.183 |
| rs663743   | T1DM | A | G | -0.100 | 0.015 | 3.50E-11  | 44   | 0.035  | 0.035 | 0.318 |
| rs6679677  | T1DM | A | C | 0.642  | 0.021 | 1.00E-200 | 939  | 0.045  | 0.048 | 0.348 |
| rs689      | T1DM | T | A | 0.712  | 0.019 | 1.00E-200 | 1477 | 0.043  | 0.041 | 0.297 |
| rs6908236  | T1DM | C | A | 0.166  | 0.014 | 6.31E-32  | 138  | 0.051  | 0.034 | 0.130 |
| rs6908626  | T1DM | T | G | 0.203  | 0.019 | 6.14E-28  | 120  | -0.119 | 0.053 | 0.024 |
| rs7068821  | T1DM | T | G | -0.165 | 0.016 | 5.07E-24  | 102  | -0.048 | 0.040 | 0.228 |
| rs7130222  | T1DM | G | T | -0.092 | 0.016 | 1.30E-08  | 32   | -0.021 | 0.038 | 0.575 |
| rs722988   | T1DM | C | T | 0.083  | 0.014 | 9.78E-09  | 33   | -0.014 | 0.036 | 0.706 |
| rs7237497  | T1DM | C | T | -0.220 | 0.019 | 2.71E-32  | 140  | -0.015 | 0.048 | 0.754 |
| rs7301381  | T1DM | C | T | -0.094 | 0.014 | 5.25E-11  | 43   | -0.090 | 0.034 | 0.008 |
| rs73432769 | T1DM | T | C | 0.335  | 0.046 | 2.34E-13  | 54   | 0.124  | 0.136 | 0.360 |
| rs7511678  | T1DM | A | G | 0.094  | 0.017 | 3.09E-08  | 31   | -0.020 | 0.036 | 0.575 |
| rs7668577  | T1DM | C | A | 0.094  | 0.015 | 7.26E-10  | 38   | 0.028  | 0.036 | 0.444 |
| rs7752257  | T1DM | G | T | -0.680 | 0.017 | 1.00E-200 | 1678 | -0.055 | 0.039 | 0.160 |
| rs7776597  | T1DM | G | A | 0.244  | 0.036 | 1.82E-11  | 45   | 0.023  | 0.109 | 0.834 |
| rs7795896  | T1DM | T | C | -0.135 | 0.016 | 1.58E-16  | 68   | -0.007 | 0.035 | 0.852 |
| rs78325861 | T1DM | G | C | -0.282 | 0.042 | 2.31E-11  | 45   | 0.150  | 0.092 | 0.104 |
| rs8046043  | T1DM | C | G | -0.085 | 0.015 | 2.49E-08  | 31   | -0.009 | 0.036 | 0.805 |
| rs855330   | T1DM | C | T | 0.111  | 0.017 | 4.89E-11  | 43   | 0.002  | 0.035 | 0.965 |
| rs9260802  | T1DM | G | A | -0.356 | 0.042 | 1.35E-17  | 73   | 0.011  | 0.088 | 0.898 |
| rs9468618  | T1DM | T | C | -0.272 | 0.026 | 5.10E-25  | 107  | -0.040 | 0.073 | 0.579 |
| rs9517712  | T1DM | C | T | -0.102 | 0.016 | 1.06E-10  | 42   | 0.001  | 0.037 | 0.982 |

T1DM: type 1 diabetes. EA: effect allele. OA: other allele. EAF: EA frequency. GX: beta-exposure. GX(SE): standard error of GX. GY: beta-outcome. GY(SE): standard error of GY.

**Table S3. Published associations of PTB on T1DM**

| SNP         | Exposure | EA | OA | GX     | GX(SE) | pval     | F  | GY     | GY(SE) | pval  |
|-------------|----------|----|----|--------|--------|----------|----|--------|--------|-------|
| rs10847937  | PTB      | C  | A  | 0.176  | 0.038  | 3.20E-06 | 22 | 0.015  | 0.018  | 0.389 |
| rs117050744 | PTB      | C  | T  | -0.444 | 0.098  | 5.58E-06 | 21 | -0.002 | 0.085  | 0.977 |
| rs117620244 | PTB      | T  | C  | 0.361  | 0.070  | 2.49E-07 | 27 | 0.004  | 0.058  | 0.949 |
| rs118082956 | PTB      | G  | A  | 0.379  | 0.085  | 7.58E-06 | 20 | 0.155  | 0.063  | 0.014 |
| rs11926030  | PTB      | G  | T  | 0.417  | 0.094  | 8.66E-06 | 20 | -0.092 | 0.060  | 0.125 |
| rs13434036  | PTB      | T  | G  | -0.446 | 0.097  | 4.02E-06 | 21 | 0.020  | 0.039  | 0.607 |
| rs145653024 | PTB      | T  | C  | 0.802  | 0.161  | 6.46E-07 | 25 | -0.009 | 0.075  | 0.901 |
| rs2027204   | PTB      | A  | G  | 0.159  | 0.034  | 3.05E-06 | 22 | 0.015  | 0.016  | 0.349 |
| rs62201868  | PTB      | A  | G  | -2.155 | 0.487  | 9.75E-06 | 20 | 0.060  | 0.062  | 0.338 |
| rs6586520   | PTB      | T  | C  | 0.155  | 0.034  | 4.32E-06 | 21 | -0.018 | 0.014  | 0.198 |
| rs72738736  | PTB      | T  | G  | 0.157  | 0.035  | 8.09E-06 | 20 | 0.008  | 0.015  | 0.590 |
| rs73579425  | PTB      | T  | C  | 0.418  | 0.094  | 9.40E-06 | 20 | 0.039  | 0.061  | 0.521 |
| rs75686985  | PTB      | A  | C  | -0.160 | 0.035  | 5.03E-06 | 21 | 0.041  | 0.016  | 0.008 |
| rs79513808  | PTB      | T  | C  | 0.331  | 0.073  | 5.51E-06 | 21 | 0.008  | 0.031  | 0.793 |

PTB: pulmonary tuberculosis. EA: effect allele. OA: other allele. EAF: EA frequency. GX: beta-exposure. GX(SE): standard error of GX. GY: beta-outcome. GY(SE): standard error of GY.



**Table S4. Published associations of FBG on PTB**

| SNP        | Exposure | EA | OA | GX     | GX(SE) | pval      | F   | GY     | GY(SE) | pval  |
|------------|----------|----|----|--------|--------|-----------|-----|--------|--------|-------|
| rs10811661 | FBG      | C  | T  | -0.024 | 0.003  | 5.65E-18  | 73  | 0.014  | 0.048  | 0.770 |
| rs10814916 | FBG      | C  | A  | 0.016  | 0.002  | 2.26E-13  | 53  | 0.080  | 0.034  | 0.018 |
| rs11195502 | FBG      | T  | C  | -0.032 | 0.004  | 1.97E-18  | 75  | 0.056  | 0.059  | 0.343 |
| rs11558471 | FBG      | G  | A  | -0.029 | 0.002  | 7.80E-37  | 159 | 0.018  | 0.035  | 0.613 |
| rs11603334 | FBG      | A  | G  | -0.019 | 0.003  | 1.12E-11  | 46  | -0.026 | 0.040  | 0.513 |
| rs11607883 | FBG      | A  | G  | -0.021 | 0.002  | 6.32E-24  | 100 | 0.049  | 0.034  | 0.143 |
| rs11619319 | FBG      | G  | A  | 0.020  | 0.002  | 1.33E-15  | 69  | 0.011  | 0.039  | 0.768 |
| rs11708067 | FBG      | G  | A  | -0.023 | 0.003  | 1.30E-18  | 78  | -0.039 | 0.045  | 0.382 |
| rs1280     | FBG      | C  | T  | -0.026 | 0.003  | 8.56E-18  | 70  | 0.062  | 0.050  | 0.214 |
| rs12888855 | FBG      | A  | C  | -0.016 | 0.003  | 5.04E-10  | 41  | 0.016  | 0.043  | 0.715 |
| rs16913693 | FBG      | G  | T  | -0.043 | 0.007  | 3.51E-11  | 42  | 0.125  | 0.110  | 0.256 |
| rs17168486 | FBG      | T  | C  | 0.031  | 0.003  | 3.17E-28  | 123 | -0.037 | 0.042  | 0.382 |
| rs2191349  | FBG      | T  | G  | 0.029  | 0.002  | 1.28E-42  | 191 | -0.018 | 0.034  | 0.603 |
| rs3829109  | FBG      | A  | G  | -0.017 | 0.003  | 1.13E-10  | 40  | 0.022  | 0.035  | 0.539 |
| rs4502156  | FBG      | C  | T  | -0.022 | 0.002  | 1.38E-25  | 110 | 0.085  | 0.034  | 0.013 |
| rs4869272  | FBG      | T  | C  | 0.018  | 0.002  | 1.02E-15  | 67  | -0.013 | 0.036  | 0.710 |
| rs560887   | FBG      | C  | T  | 0.071  | 0.003  | 1.40E-178 | 807 | -0.043 | 0.037  | 0.240 |
| rs6072275  | FBG      | A  | G  | 0.016  | 0.003  | 1.66E-08  | 33  | -0.008 | 0.039  | 0.845 |
| rs6113722  | FBG      | A  | G  | -0.035 | 0.005  | 2.49E-11  | 44  | -0.022 | 0.089  | 0.808 |
| rs6943153  | FBG      | C  | T  | -0.015 | 0.002  | 1.63E-12  | 46  | 0.023  | 0.034  | 0.505 |
| rs6975024  | FBG      | C  | T  | 0.061  | 0.003  | 2.88E-99  | 442 | 0.040  | 0.055  | 0.466 |
| rs749067   | FBG      | C  | T  | -0.017 | 0.002  | 6.12E-15  | 60  | -0.010 | 0.036  | 0.783 |
| rs7651090  | FBG      | G  | A  | 0.013  | 0.002  | 1.75E-08  | 32  | 0.006  | 0.036  | 0.879 |
| rs7903146  | FBG      | T  | C  | 0.022  | 0.002  | 2.71E-20  | 84  | -0.020 | 0.042  | 0.633 |
| rs882020   | FBG      | T  | C  | 0.021  | 0.003  | 3.04E-12  | 49  | -0.056 | 0.045  | 0.212 |
| rs9368222  | FBG      | A  | C  | 0.014  | 0.002  | 1.00E-09  | 37  | 0.034  | 0.036  | 0.341 |
| rs983309   | FBG      | G  | T  | -0.026 | 0.003  | 6.29E-15  | 62  | -0.051 | 0.045  | 0.260 |

FBG: fasting blood glucose. EA: effect allele. OA: other allele. EAF: EA frequency. GX: beta-exposure. GX(SE):

standard error of GX. GY: beta-outcome. GY(SE): standard error of GY.

**Table S5. Published associations of HAb1c on PTB**

| SNP         | Exposure | EA | OA | GX     | GX(SE) | pval     | F   | GY     | GY(SE) | pval  |
|-------------|----------|----|----|--------|--------|----------|-----|--------|--------|-------|
| rs10037493  | HAb1c    | T  | C  | 0.017  | 0.001  | 9.30E-31 | 133 | 0.059  | 0.034  | 0.084 |
| rs10141786  | HAb1c    | G  | A  | -0.011 | 0.002  | 1.10E-12 | 51  | 0.046  | 0.035  | 0.191 |
| rs1026477   | HAb1c    | A  | G  | -0.008 | 0.001  | 1.70E-08 | 32  | -0.025 | 0.034  | 0.461 |
| rs10283100  | HAb1c    | G  | A  | 0.024  | 0.003  | 3.00E-13 | 53  | -0.104 | 0.065  | 0.108 |
| rs10455823  | HAb1c    | G  | A  | -0.023 | 0.004  | 1.60E-10 | 41  | 0.073  | 0.137  | 0.597 |
| rs1046934   | HAb1c    | C  | A  | 0.010  | 0.002  | 4.50E-10 | 39  | -0.001 | 0.034  | 0.968 |
| rs10475282  | HAb1c    | A  | G  | -0.010 | 0.002  | 2.10E-09 | 36  | 0.005  | 0.044  | 0.909 |
| rs10476063  | HAb1c    | A  | G  | -0.012 | 0.002  | 6.10E-15 | 61  | 0.009  | 0.035  | 0.792 |
| rs10490551  | HAb1c    | A  | T  | 0.012  | 0.002  | 4.50E-13 | 52  | -0.034 | 0.037  | 0.366 |
| rs10771750  | HAb1c    | C  | A  | 0.010  | 0.001  | 5.10E-11 | 43  | -0.024 | 0.034  | 0.486 |
| rs10848835  | HAb1c    | C  | G  | 0.016  | 0.003  | 5.90E-11 | 43  | 0.002  | 0.067  | 0.980 |
| rs10888385  | HAb1c    | C  | T  | -0.012 | 0.002  | 1.90E-16 | 68  | -0.022 | 0.034  | 0.508 |
| rs10978435  | HAb1c    | C  | T  | -0.009 | 0.002  | 4.80E-08 | 30  | 0.032  | 0.036  | 0.361 |
| rs11049381  | HAb1c    | A  | G  | 0.011  | 0.002  | 3.80E-14 | 57  | -0.046 | 0.034  | 0.170 |
| rs11085744  | HAb1c    | T  | C  | -0.012 | 0.002  | 3.30E-15 | 62  | 0.020  | 0.034  | 0.565 |
| rs11118683  | HAb1c    | T  | C  | 0.009  | 0.002  | 5.80E-09 | 34  | -0.025 | 0.034  | 0.462 |
| rs11170395  | HAb1c    | G  | A  | 0.015  | 0.003  | 1.40E-08 | 32  | 0.015  | 0.055  | 0.793 |
| rs112723784 | HAb1c    | C  | T  | 0.009  | 0.002  | 3.10E-08 | 31  | 0.047  | 0.039  | 0.220 |
| rs113252144 | HAb1c    | T  | C  | 0.021  | 0.003  | 5.90E-14 | 56  | 0.100  | 0.063  | 0.115 |
| rs113898003 | HAb1c    | C  | T  | -0.018 | 0.002  | 8.40E-28 | 119 | -0.004 | 0.039  | 0.921 |
| rs115152027 | HAb1c    | G  | C  | -0.019 | 0.004  | 3.40E-08 | 30  | -0.069 | 0.101  | 0.496 |
| rs11621587  | HAb1c    | C  | G  | 0.017  | 0.002  | 6.10E-19 | 79  | 0.021  | 0.049  | 0.669 |
| rs11645016  | HAb1c    | T  | C  | -0.009 | 0.002  | 2.50E-09 | 36  | -0.027 | 0.035  | 0.431 |
| rs11651123  | HAb1c    | A  | G  | -0.013 | 0.001  | 2.70E-18 | 76  | 0.020  | 0.034  | 0.568 |
| rs11664776  | HAb1c    | C  | T  | -0.008 | 0.002  | 2.60E-08 | 31  | -0.019 | 0.035  | 0.591 |
| rs11707746  | HAb1c    | C  | T  | -0.011 | 0.002  | 1.40E-10 | 41  | -0.051 | 0.039  | 0.188 |
| rs11732618  | HAb1c    | A  | G  | 0.009  | 0.002  | 2.40E-09 | 36  | -0.016 | 0.037  | 0.670 |
| rs11733064  | HAb1c    | G  | C  | -0.010 | 0.002  | 4.80E-10 | 39  | 0.061  | 0.038  | 0.108 |
| rs117372259 | HAb1c    | G  | A  | 0.025  | 0.004  | 2.90E-08 | 31  | -0.070 | 0.121  | 0.564 |
| rs11765149  | HAb1c    | C  | G  | -0.016 | 0.003  | 1.40E-08 | 32  | -0.022 | 0.052  | 0.674 |
| rs11938781  | HAb1c    | C  | T  | -0.027 | 0.002  | 2.40E-41 | 181 | -0.019 | 0.055  | 0.730 |
| rs11967850  | HAb1c    | T  | C  | -0.011 | 0.002  | 6.20E-09 | 34  | 0.024  | 0.049  | 0.622 |
| rs11984666  | HAb1c    | A  | C  | -0.016 | 0.002  | 3.30E-18 | 76  | 0.040  | 0.045  | 0.368 |
| rs12036042  | HAb1c    | C  | T  | 0.012  | 0.002  | 6.40E-11 | 43  | -0.107 | 0.041  | 0.010 |
| rs12563643  | HAb1c    | G  | C  | 0.015  | 0.002  | 6.60E-16 | 65  | -0.065 | 0.042  | 0.124 |
| rs12571363  | HAb1c    | A  | C  | -0.018 | 0.002  | 2.70E-13 | 53  | -0.096 | 0.072  | 0.184 |
| rs12631704  | HAb1c    | G  | A  | -0.014 | 0.002  | 1.00E-15 | 64  | -0.015 | 0.042  | 0.717 |
| rs12684650  | HAb1c    | T  | C  | -0.015 | 0.002  | 1.00E-20 | 87  | -0.106 | 0.036  | 0.003 |
| rs12698403  | HAb1c    | A  | G  | -0.013 | 0.002  | 3.50E-17 | 71  | -0.021 | 0.034  | 0.527 |

|             |       |   |   |        |       |          |     |        |       |       |
|-------------|-------|---|---|--------|-------|----------|-----|--------|-------|-------|
| rs12894780  | HAb1c | C | T | -0.017 | 0.002 | 4.40E-14 | 57  | 0.136  | 0.051 | 0.007 |
| rs13044144  | HAb1c | C | G | 0.014  | 0.002 | 1.90E-17 | 72  | -0.022 | 0.040 | 0.576 |
| rs13044825  | HAb1c | C | G | 0.012  | 0.002 | 4.80E-13 | 52  | 0.043  | 0.034 | 0.206 |
| rs13073544  | HAb1c | C | G | -0.009 | 0.002 | 4.70E-08 | 30  | -0.018 | 0.045 | 0.696 |
| rs13101469  | HAb1c | T | A | -0.014 | 0.002 | 2.60E-14 | 58  | -0.059 | 0.045 | 0.190 |
| rs13229167  | HAb1c | A | G | -0.013 | 0.002 | 1.70E-14 | 59  | -0.033 | 0.039 | 0.401 |
| rs13245206  | HAb1c | A | G | -0.009 | 0.002 | 4.60E-09 | 34  | -0.013 | 0.034 | 0.709 |
| rs13417268  | HAb1c | G | C | 0.011  | 0.002 | 1.50E-09 | 37  | -0.018 | 0.039 | 0.644 |
| rs140988776 | HAb1c | T | C | -0.021 | 0.003 | 5.20E-13 | 52  | -0.014 | 0.085 | 0.874 |
| rs147110934 | HAb1c | T | G | -0.039 | 0.005 | 1.10E-15 | 64  | 0.222  | 0.223 | 0.320 |
| rs1474647   | HAb1c | T | C | -0.012 | 0.001 | 5.10E-15 | 61  | 0.028  | 0.034 | 0.405 |
| rs1516890   | HAb1c | A | G | -0.009 | 0.002 | 3.60E-10 | 39  | 0.017  | 0.034 | 0.606 |
| rs1530555   | HAb1c | T | C | 0.011  | 0.002 | 1.70E-13 | 54  | 0.013  | 0.034 | 0.715 |
| rs1555211   | HAb1c | T | C | 0.010  | 0.002 | 4.80E-09 | 34  | -0.038 | 0.038 | 0.322 |
| rs16854110  | HAb1c | G | C | -0.019 | 0.002 | 4.00E-19 | 80  | 0.010  | 0.042 | 0.809 |
| rs17099139  | HAb1c | G | C | -0.010 | 0.002 | 7.90E-10 | 38  | -0.038 | 0.038 | 0.316 |
| rs17400325  | HAb1c | C | T | 0.026  | 0.004 | 8.20E-12 | 47  | -0.039 | 0.122 | 0.747 |
| rs1776877   | HAb1c | A | G | -0.022 | 0.002 | 4.60E-29 | 125 | -0.097 | 0.048 | 0.042 |
| rs1786812   | HAb1c | C | G | 0.011  | 0.002 | 1.30E-10 | 41  | -0.026 | 0.038 | 0.481 |
| rs17884312  | HAb1c | T | C | 0.012  | 0.002 | 5.10E-10 | 39  | -0.004 | 0.046 | 0.930 |
| rs183587141 | HAb1c | T | C | -0.042 | 0.006 | 2.70E-12 | 49  | -0.011 | 0.184 | 0.952 |
| rs1867264   | HAb1c | T | A | -0.010 | 0.002 | 2.70E-10 | 40  | 0.017  | 0.036 | 0.634 |
| rs1892525   | HAb1c | C | G | -0.009 | 0.002 | 6.20E-09 | 34  | 0.038  | 0.040 | 0.340 |
| rs1909122   | HAb1c | T | C | -0.014 | 0.002 | 6.60E-19 | 79  | 0.075  | 0.035 | 0.032 |
| rs2079147   | HAb1c | G | A | -0.010 | 0.002 | 3.30E-11 | 44  | -0.010 | 0.034 | 0.772 |
| rs2157323   | HAb1c | C | T | 0.009  | 0.002 | 2.10E-08 | 31  | 0.080  | 0.038 | 0.034 |
| rs2167734   | HAb1c | A | G | 0.010  | 0.002 | 8.90E-10 | 38  | -0.008 | 0.040 | 0.847 |
| rs2219320   | HAb1c | C | T | -0.014 | 0.002 | 1.30E-15 | 64  | 0.027  | 0.042 | 0.521 |
| rs2236610   | HAb1c | G | C | -0.011 | 0.002 | 1.50E-08 | 32  | -0.004 | 0.045 | 0.923 |
| rs225646    | HAb1c | A | G | 0.013  | 0.002 | 5.00E-14 | 57  | -0.026 | 0.043 | 0.538 |
| rs2294214   | HAb1c | C | A | -0.014 | 0.002 | 1.40E-18 | 77  | -0.031 | 0.039 | 0.422 |
| rs2364232   | HAb1c | C | A | 0.016  | 0.002 | 1.40E-21 | 91  | 0.048  | 0.038 | 0.203 |
| rs2412771   | HAb1c | C | T | 0.011  | 0.002 | 4.50E-13 | 52  | 0.009  | 0.034 | 0.781 |
| rs2428551   | HAb1c | A | T | 0.011  | 0.002 | 6.00E-12 | 47  | -0.023 | 0.039 | 0.546 |
| rs2526625   | HAb1c | C | A | -0.015 | 0.002 | 4.60E-18 | 75  | -0.085 | 0.040 | 0.033 |
| rs2544535   | HAb1c | C | T | 0.012  | 0.001 | 4.00E-16 | 66  | -0.017 | 0.034 | 0.613 |
| rs2579762   | HAb1c | C | A | -0.014 | 0.001 | 9.50E-20 | 83  | -0.041 | 0.034 | 0.221 |
| rs2647242   | HAb1c | G | A | -0.011 | 0.002 | 1.40E-09 | 37  | -0.033 | 0.044 | 0.447 |
| rs2648717   | HAb1c | C | G | 0.014  | 0.002 | 1.10E-12 | 51  | -0.133 | 0.048 | 0.006 |
| rs2678408   | HAb1c | C | T | -0.012 | 0.001 | 1.80E-15 | 63  | -0.004 | 0.034 | 0.897 |
| rs2812208   | HAb1c | C | G | 0.068  | 0.005 | 1.20E-38 | 169 | 0.074  | 0.115 | 0.522 |

|            |       |   |   |        |       |          |     |        |       |       |
|------------|-------|---|---|--------|-------|----------|-----|--------|-------|-------|
| rs28469297 | HAb1c | C | A | 0.013  | 0.002 | 2.20E-08 | 31  | 0.022  | 0.050 | 0.657 |
| rs2854152  | HAb1c | G | A | 0.017  | 0.002 | 1.30E-26 | 114 | -0.011 | 0.035 | 0.755 |
| rs28708703 | HAb1c | G | C | 0.013  | 0.002 | 7.10E-10 | 38  | -0.035 | 0.050 | 0.481 |
| rs2881019  | HAb1c | C | T | -0.012 | 0.002 | 4.50E-14 | 57  | -0.095 | 0.035 | 0.006 |
| rs2885697  | HAb1c | T | G | -0.015 | 0.002 | 2.20E-20 | 86  | 0.011  | 0.035 | 0.766 |
| rs2974389  | HAb1c | G | A | -0.011 | 0.002 | 2.70E-14 | 58  | -0.012 | 0.034 | 0.720 |
| rs335429   | HAb1c | C | T | 0.008  | 0.001 | 3.40E-08 | 30  | -0.036 | 0.034 | 0.283 |
| rs34587839 | HAb1c | A | G | -0.016 | 0.002 | 5.00E-14 | 57  | 0.029  | 0.046 | 0.526 |
| rs35506    | HAb1c | A | T | 0.010  | 0.002 | 4.10E-09 | 35  | -0.028 | 0.039 | 0.478 |
| rs35945722 | HAb1c | A | G | 0.016  | 0.002 | 1.80E-16 | 68  | 0.032  | 0.045 | 0.482 |
| rs36226649 | HAb1c | C | T | 0.024  | 0.003 | 1.80E-15 | 63  | 0.040  | 0.077 | 0.601 |
| rs3791679  | HAb1c | G | A | -0.026 | 0.002 | 4.10E-47 | 208 | 0.004  | 0.040 | 0.926 |
| rs3858603  | HAb1c | A | G | -0.008 | 0.001 | 1.40E-08 | 32  | -0.018 | 0.034 | 0.582 |
| rs41311445 | HAb1c | C | A | -0.017 | 0.003 | 5.20E-11 | 43  | -0.008 | 0.049 | 0.871 |
| rs425102   | HAb1c | G | T | -0.012 | 0.002 | 4.60E-12 | 48  | -0.024 | 0.043 | 0.581 |
| rs4284505  | HAb1c | G | A | -0.010 | 0.002 | 1.70E-10 | 41  | -0.089 | 0.033 | 0.008 |
| rs4320932  | HAb1c | C | T | -0.013 | 0.002 | 3.10E-12 | 49  | 0.015  | 0.044 | 0.733 |
| rs4584512  | HAb1c | C | G | -0.009 | 0.002 | 3.70E-08 | 30  | 0.013  | 0.037 | 0.718 |
| rs4813418  | HAb1c | G | A | -0.009 | 0.002 | 5.60E-09 | 34  | 0.051  | 0.037 | 0.169 |
| rs4836528  | HAb1c | C | T | -0.013 | 0.002 | 1.10E-17 | 73  | 0.026  | 0.034 | 0.443 |
| rs4894559  | HAb1c | G | A | -0.009 | 0.002 | 2.10E-08 | 31  | 0.021  | 0.037 | 0.566 |
| rs4909034  | HAb1c | G | C | -0.010 | 0.002 | 8.90E-11 | 42  | 0.083  | 0.035 | 0.018 |
| rs4909296  | HAb1c | C | T | -0.010 | 0.001 | 4.10E-11 | 44  | 0.003  | 0.034 | 0.928 |
| rs4988321  | HAb1c | A | G | -0.026 | 0.003 | 3.10E-14 | 58  | -0.049 | 0.137 | 0.719 |
| rs513953   | HAb1c | G | A | 0.015  | 0.002 | 3.60E-18 | 76  | 0.014  | 0.039 | 0.721 |
| rs520461   | HAb1c | G | A | -0.012 | 0.002 | 4.60E-11 | 43  | -0.083 | 0.039 | 0.033 |
| rs55750792 | HAb1c | A | G | 0.011  | 0.001 | 4.90E-13 | 52  | -0.008 | 0.034 | 0.814 |
| rs55914134 | HAb1c | G | A | -0.009 | 0.002 | 1.00E-08 | 33  | 0.032  | 0.036 | 0.366 |
| rs56308303 | HAb1c | T | C | 0.009  | 0.002 | 3.20E-10 | 40  | -0.022 | 0.034 | 0.509 |
| rs56332326 | HAb1c | C | T | -0.014 | 0.002 | 4.30E-10 | 39  | 0.016  | 0.042 | 0.697 |
| rs56795193 | HAb1c | C | T | 0.010  | 0.002 | 2.80E-08 | 31  | -0.014 | 0.040 | 0.727 |
| rs59748147 | HAb1c | C | T | 0.020  | 0.003 | 7.10E-14 | 56  | 0.084  | 0.050 | 0.092 |
| rs5992136  | HAb1c | C | G | 0.012  | 0.002 | 4.50E-13 | 52  | -0.006 | 0.041 | 0.890 |
| rs61465425 | HAb1c | T | C | 0.011  | 0.002 | 1.10E-08 | 33  | -0.049 | 0.050 | 0.331 |
| rs61846088 | HAb1c | T | C | 0.010  | 0.002 | 3.60E-08 | 30  | 0.046  | 0.042 | 0.272 |
| rs61966248 | HAb1c | C | T | -0.011 | 0.002 | 8.60E-09 | 33  | 0.020  | 0.048 | 0.677 |
| rs62088172 | HAb1c | T | C | 0.009  | 0.002 | 3.10E-09 | 35  | -0.012 | 0.034 | 0.719 |
| rs62126408 | HAb1c | C | T | 0.017  | 0.002 | 2.70E-16 | 67  | 0.084  | 0.056 | 0.135 |
| rs62275653 | HAb1c | T | C | -0.024 | 0.003 | 2.70E-12 | 49  | 0.102  | 0.061 | 0.093 |
| rs62437411 | HAb1c | A | G | 0.011  | 0.002 | 3.40E-12 | 48  | 0.019  | 0.035 | 0.580 |
| rs62621197 | HAb1c | T | C | -0.050 | 0.004 | 6.70E-34 | 147 | -0.033 | 0.119 | 0.783 |

|            |       |    |   |        |       |          |     |        |       |       |
|------------|-------|----|---|--------|-------|----------|-----|--------|-------|-------|
| rs644570   | HAb1c | A  | G | 0.009  | 0.002 | 2.00E-09 | 36  | 0.017  | 0.035 | 0.638 |
| rs663378   | HAb1c | A  | G | -0.012 | 0.002 | 1.90E-09 | 36  | -0.013 | 0.046 | 0.782 |
| rs66678205 | HAb1c | AT | A | -0.009 | 0.002 | 3.40E-08 | 30  | 0.000  | 0.034 | 0.992 |
| rs6671370  | HAb1c | A  | G | 0.016  | 0.002 | 8.90E-23 | 96  | -0.004 | 0.036 | 0.920 |
| rs6729308  | HAb1c | A  | G | -0.013 | 0.002 | 3.50E-18 | 76  | 0.008  | 0.034 | 0.815 |
| rs67326273 | HAb1c | G  | A | 0.011  | 0.002 | 4.30E-09 | 34  | 0.001  | 0.053 | 0.977 |
| rs6762578  | HAb1c | A  | G | 0.014  | 0.002 | 2.80E-14 | 58  | -0.010 | 0.045 | 0.821 |
| rs6823809  | HAb1c | C  | T | -0.023 | 0.002 | 1.10E-45 | 201 | -0.022 | 0.038 | 0.560 |
| rs6859171  | HAb1c | T  | C | 0.012  | 0.002 | 8.40E-11 | 42  | -0.002 | 0.040 | 0.963 |
| rs6869268  | HAb1c | C  | T | -0.009 | 0.002 | 6.10E-09 | 34  | 0.003  | 0.036 | 0.938 |
| rs7029491  | HAb1c | G  | C | 0.011  | 0.002 | 1.10E-11 | 46  | -0.021 | 0.037 | 0.581 |
| rs7068966  | HAb1c | T  | C | 0.017  | 0.001 | 3.70E-31 | 135 | 0.023  | 0.034 | 0.500 |
| rs7075773  | HAb1c | T  | C | -0.012 | 0.002 | 5.70E-15 | 61  | -0.002 | 0.034 | 0.944 |
| rs7086293  | HAb1c | C  | T | -0.008 | 0.001 | 3.40E-08 | 30  | 0.006  | 0.034 | 0.869 |
| rs71427097 | HAb1c | T  | C | -0.025 | 0.004 | 4.50E-08 | 30  | 0.020  | 0.098 | 0.835 |
| rs723588   | HAb1c | C  | T | 0.016  | 0.002 | 1.00E-14 | 60  | 0.010  | 0.045 | 0.833 |
| rs72643433 | HAb1c | A  | G | -0.013 | 0.002 | 3.50E-13 | 53  | 0.010  | 0.042 | 0.808 |
| rs72666766 | HAb1c | G  | A | -0.011 | 0.002 | 4.10E-08 | 30  | 0.119  | 0.057 | 0.037 |
| rs72755233 | HAb1c | A  | G | -0.024 | 0.002 | 5.80E-25 | 106 | 0.050  | 0.053 | 0.349 |
| rs72907878 | HAb1c | A  | G | -0.020 | 0.002 | 7.50E-21 | 88  | -0.071 | 0.051 | 0.169 |
| rs73048979 | HAb1c | T  | C | 0.028  | 0.005 | 1.40E-09 | 37  | -0.051 | 0.208 | 0.808 |
| rs73175572 | HAb1c | G  | A | 0.020  | 0.002 | 1.30E-17 | 73  | -0.091 | 0.052 | 0.081 |
| rs7326822  | HAb1c | G  | A | 0.009  | 0.002 | 1.40E-08 | 32  | 0.050  | 0.034 | 0.139 |
| rs735830   | HAb1c | A  | G | -0.013 | 0.002 | 1.10E-12 | 51  | 0.013  | 0.044 | 0.769 |
| rs7359156  | HAb1c | G  | A | -0.012 | 0.002 | 6.10E-11 | 43  | 0.016  | 0.040 | 0.682 |
| rs741593   | HAb1c | G  | T | -0.010 | 0.002 | 1.40E-09 | 37  | 0.049  | 0.036 | 0.172 |
| rs7506068  | HAb1c | G  | C | 0.009  | 0.002 | 3.00E-09 | 35  | 0.061  | 0.035 | 0.078 |
| rs75216331 | HAb1c | A  | G | -0.011 | 0.002 | 2.90E-10 | 40  | -0.036 | 0.045 | 0.430 |
| rs75301758 | HAb1c | T  | C | -0.011 | 0.002 | 5.10E-09 | 34  | -0.038 | 0.039 | 0.330 |
| rs7546750  | HAb1c | A  | G | 0.010  | 0.002 | 1.50E-10 | 41  | -0.021 | 0.035 | 0.548 |
| rs7558918  | HAb1c | G  | T | 0.014  | 0.001 | 4.10E-20 | 84  | -0.034 | 0.034 | 0.311 |
| rs7582299  | HAb1c | C  | T | -0.010 | 0.002 | 4.00E-08 | 30  | -0.020 | 0.037 | 0.583 |
| rs7663740  | HAb1c | T  | G | 0.024  | 0.001 | 2.40E-60 | 269 | 0.052  | 0.035 | 0.131 |
| rs769675   | HAb1c | C  | T | 0.009  | 0.002 | 2.20E-08 | 31  | 0.010  | 0.036 | 0.783 |
| rs76993203 | HAb1c | A  | G | -0.014 | 0.001 | 5.60E-20 | 84  | 0.030  | 0.034 | 0.385 |
| rs77156651 | HAb1c | A  | G | -0.020 | 0.003 | 8.20E-10 | 38  | -0.088 | 0.094 | 0.351 |
| rs7753558  | HAb1c | A  | C | 0.010  | 0.002 | 9.50E-10 | 37  | 0.008  | 0.036 | 0.826 |
| rs78304176 | HAb1c | T  | G | -0.020 | 0.003 | 3.10E-11 | 44  | -0.018 | 0.084 | 0.826 |
| rs7854962  | HAb1c | G  | C | -0.015 | 0.002 | 1.20E-15 | 64  | 0.027  | 0.043 | 0.527 |
| rs78808004 | HAb1c | G  | A | 0.015  | 0.003 | 2.00E-09 | 36  | 0.038  | 0.074 | 0.613 |
| rs79409628 | HAb1c | T  | G | 0.020  | 0.003 | 2.70E-14 | 58  | -0.138 | 0.063 | 0.030 |

|           |       |   |   |        |       |          |     |        |       |       |
|-----------|-------|---|---|--------|-------|----------|-----|--------|-------|-------|
| rs7954392 | HAb1c | A | C | 0.014  | 0.003 | 3.60E-08 | 30  | 0.024  | 0.069 | 0.725 |
| rs8037367 | HAb1c | C | T | 0.011  | 0.002 | 1.40E-10 | 41  | 0.002  | 0.044 | 0.966 |
| rs8069700 | HAb1c | A | G | -0.010 | 0.002 | 3.20E-08 | 31  | -0.051 | 0.039 | 0.192 |
| rs820077  | HAb1c | A | G | 0.021  | 0.002 | 2.00E-29 | 127 | -0.082 | 0.062 | 0.186 |
| rs841216  | HAb1c | G | A | -0.009 | 0.002 | 1.20E-08 | 33  | -0.019 | 0.034 | 0.577 |
| rs879394  | HAb1c | T | G | -0.016 | 0.002 | 9.30E-19 | 78  | -0.016 | 0.038 | 0.674 |
| rs910969  | HAb1c | G | A | 0.009  | 0.002 | 1.40E-08 | 32  | -0.026 | 0.036 | 0.481 |
| rs9271420 | HAb1c | G | A | -0.014 | 0.002 | 4.70E-19 | 80  | 0.045  | 0.034 | 0.183 |
| rs9295    | HAb1c | A | G | 0.011  | 0.002 | 4.60E-11 | 43  | -0.093 | 0.037 | 0.011 |
| rs9310389 | HAb1c | T | C | 0.009  | 0.002 | 7.00E-10 | 38  | -0.036 | 0.034 | 0.289 |
| rs9321170 | HAb1c | A | G | 0.011  | 0.002 | 3.30E-11 | 44  | -0.019 | 0.035 | 0.581 |
| rs9672558 | HAb1c | C | T | -0.014 | 0.002 | 4.00E-11 | 44  | -0.031 | 0.065 | 0.629 |
| rs9701805 | HAb1c | C | G | 0.019  | 0.003 | 1.80E-13 | 54  | 0.007  | 0.072 | 0.918 |
| rs980896  | HAb1c | A | G | 0.010  | 0.001 | 1.40E-11 | 46  | 0.013  | 0.034 | 0.698 |
| rs9912553 | HAb1c | G | C | 0.016  | 0.002 | 2.90E-22 | 94  | 0.004  | 0.039 | 0.918 |
| rs9970286 | HAb1c | A | G | 0.009  | 0.002 | 8.80E-09 | 33  | 0.041  | 0.035 | 0.244 |

HAb1c: glycosylated hemoglobin . EA: effect allele. OA: other allele. EAF: EA frequency. GX: beta-exposure. GX(SE): standard error of GX. GY: beta-outcome. GY(SE): standard error of GY.

**Table S6. Published associations of FI on PTB**

| SNP         | Exposure | EA | OA | GX     | GX(SE) | pval     | F   | GY     | GY(SE) | pval  |
|-------------|----------|----|----|--------|--------|----------|-----|--------|--------|-------|
| rs10050393  | FI       | C  | T  | -0.009 | 0.002  | 4.84E-08 | 22  | 0.021  | 0.034  | 0.533 |
| rs11708067  | FI       | G  | A  | 0.014  | 0.002  | 1.30E-09 | 34  | -0.039 | 0.045  | 0.382 |
| rs11727676  | FI       | C  | T  | 0.020  | 0.004  | 2.90E-08 | 27  | -0.102 | 0.060  | 0.090 |
| rs118164457 | FI       | C  | T  | 0.035  | 0.006  | 3.86E-10 | 37  | 0.004  | 0.148  | 0.981 |
| rs1206760   | FI       | A  | G  | -0.011 | 0.002  | 8.82E-10 | 35  | 0.033  | 0.034  | 0.325 |
| rs12454712  | FI       | C  | T  | -0.014 | 0.003  | 1.78E-09 | 32  | 0.019  | 0.034  | 0.564 |
| rs13258890  | FI       | C  | T  | -0.013 | 0.003  | 2.77E-08 | 26  | -0.044 | 0.041  | 0.287 |
| rs17036126  | FI       | T  | C  | 0.021  | 0.003  | 1.28E-10 | 49  | 0.011  | 0.057  | 0.850 |
| rs17331151  | FI       | T  | C  | -0.016 | 0.003  | 1.52E-08 | 27  | -0.060 | 0.059  | 0.306 |
| rs2108349   | FI       | A  | G  | -0.012 | 0.002  | 1.13E-08 | 33  | 0.023  | 0.034  | 0.495 |
| rs2780215   | FI       | G  | A  | -0.039 | 0.006  | 1.06E-09 | 39  | 0.146  | 0.100  | 0.144 |
| rs2845885   | FI       | T  | C  | -0.020 | 0.004  | 1.18E-08 | 27  | -0.016 | 0.063  | 0.797 |
| rs2943646   | FI       | G  | A  | 0.025  | 0.002  | 8.47E-39 | 173 | 0.034  | 0.035  | 0.328 |
| rs4865796   | FI       | A  | G  | 0.017  | 0.002  | 7.33E-17 | 68  | -0.058 | 0.036  | 0.103 |
| rs5017305   | FI       | T  | A  | -0.014 | 0.003  | 1.07E-08 | 28  | 0.006  | 0.045  | 0.903 |
| rs6487237   | FI       | A  | C  | 0.015  | 0.003  | 4.68E-09 | 35  | -0.034 | 0.043  | 0.430 |
| rs6855363   | FI       | C  | T  | -0.013 | 0.002  | 4.04E-08 | 39  | -0.038 | 0.039  | 0.334 |
| rs7012814   | FI       | A  | G  | -0.022 | 0.002  | 8.34E-30 | 133 | 0.017  | 0.034  | 0.610 |
| rs7133378   | FI       | A  | G  | -0.013 | 0.002  | 6.00E-11 | 40  | -0.055 | 0.037  | 0.144 |
| rs73013411  | FI       | A  | C  | -0.018 | 0.003  | 2.08E-08 | 32  | -0.023 | 0.061  | 0.708 |
| rs731839    | FI       | A  | G  | -0.012 | 0.002  | 3.86E-11 | 41  | -0.007 | 0.035  | 0.853 |
| rs7903146   | FI       | T  | C  | -0.012 | 0.002  | 1.24E-09 | 31  | -0.020 | 0.042  | 0.633 |
| rs860598    | FI       | A  | G  | 0.018  | 0.003  | 6.88E-12 | 50  | 0.024  | 0.041  | 0.548 |
| rs972283    | FI       | G  | A  | 0.011  | 0.002  | 1.09E-08 | 31  | -0.044 | 0.034  | 0.193 |

FI: fasting insulin. EA: effect allele. OA: other allele. EAF: EA frequency. GX: beta-exposure. GX(SE): standard error of GX. GY: beta-outcome. GY(SE): standard error of GY.

**Table S7. Published associations of LDL-C on PTB**

| SNP         | Exposure | EA | OA | GX     | GX(SE) | pval      | F   | GY     | GY(SE) | pval  |
|-------------|----------|----|----|--------|--------|-----------|-----|--------|--------|-------|
| rs10490626  | LDL-C    | A  | G  | -0.051 | 0.007  | 1.70E-12  | 54  | 0.124  | 0.065  | 0.056 |
| rs10832962  | LDL-C    | T  | C  | 0.032  | 0.004  | 6.62E-14  | 64  | 0.043  | 0.035  | 0.217 |
| rs10893499  | LDL-C    | A  | G  | 0.052  | 0.005  | 3.86E-21  | 97  | 0.056  | 0.043  | 0.188 |
| rs10947332  | LDL-C    | A  | G  | 0.050  | 0.006  | 6.97E-18  | 81  | -0.182 | 0.044  | 0.000 |
| rs112201728 | LDL-C    | T  | C  | 0.068  | 0.010  | 8.51E-10  | 42  | -0.100 | 0.072  | 0.163 |
| rs11563251  | LDL-C    | T  | C  | 0.035  | 0.006  | 4.50E-08  | 31  | -0.006 | 0.057  | 0.909 |
| rs11591147  | LDL-C    | T  | G  | -0.497 | 0.018  | 8.57E-143 | 762 | -0.057 | 0.091  | 0.532 |
| rs1169288   | LDL-C    | C  | A  | 0.038  | 0.004  | 6.45E-21  | 88  | -0.009 | 0.035  | 0.790 |
| rs12066643  | LDL-C    | T  | C  | -0.039 | 0.006  | 1.06E-08  | 37  | -0.022 | 0.050  | 0.662 |
| rs1250229   | LDL-C    | C  | T  | 0.024  | 0.004  | 3.13E-08  | 33  | 0.051  | 0.042  | 0.220 |
| rs12721109  | LDL-C    | A  | G  | -0.446 | 0.018  | 2.99E-122 | 595 | -0.137 | 0.123  | 0.264 |
| rs12748152  | LDL-C    | T  | C  | 0.050  | 0.007  | 3.21E-12  | 57  | 0.022  | 0.063  | 0.725 |
| rs12916     | LDL-C    | C  | T  | 0.073  | 0.004  | 7.79E-78  | 372 | -0.031 | 0.034  | 0.355 |
| rs13277801  | LDL-C    | T  | C  | -0.034 | 0.004  | 3.99E-17  | 79  | -0.022 | 0.035  | 0.522 |
| rs1367117   | LDL-C    | A  | G  | 0.119  | 0.004  | 9.48E-183 | 879 | -0.002 | 0.037  | 0.957 |
| rs1564348   | LDL-C    | C  | T  | 0.048  | 0.005  | 2.76E-21  | 93  | -0.070 | 0.048  | 0.147 |
| rs16831243  | LDL-C    | T  | C  | 0.038  | 0.006  | 9.06E-12  | 47  | 0.051  | 0.047  | 0.278 |
| rs16891156  | LDL-C    | C  | A  | 0.097  | 0.017  | 8.23E-09  | 32  | 0.031  | 0.112  | 0.786 |
| rs1801689   | LDL-C    | C  | A  | 0.103  | 0.014  | 9.81E-12  | 55  | -0.076 | 0.172  | 0.659 |
| rs1883025   | LDL-C    | T  | C  | -0.030 | 0.004  | 6.14E-11  | 45  | -0.076 | 0.042  | 0.072 |
| rs2000999   | LDL-C    | A  | G  | 0.065  | 0.005  | 4.22E-41  | 200 | 0.007  | 0.042  | 0.873 |
| rs2030746   | LDL-C    | T  | C  | 0.021  | 0.004  | 8.60E-09  | 32  | 0.053  | 0.035  | 0.130 |
| rs2073547   | LDL-C    | G  | A  | 0.049  | 0.005  | 1.92E-21  | 98  | -0.017 | 0.036  | 0.631 |
| rs2228603   | LDL-C    | T  | C  | -0.104 | 0.007  | 4.43E-44  | 209 | 0.077  | 0.067  | 0.252 |
| rs2315065   | LDL-C    | A  | C  | 0.110  | 0.016  | 5.23E-12  | 49  | 0.084  | 0.069  | 0.228 |
| rs2328223   | LDL-C    | C  | A  | 0.030  | 0.005  | 5.63E-09  | 36  | -0.031 | 0.042  | 0.461 |
| rs2390536   | LDL-C    | A  | G  | 0.022  | 0.004  | 2.04E-08  | 34  | 0.033  | 0.035  | 0.341 |
| rs2419604   | LDL-C    | G  | A  | -0.030 | 0.004  | 7.49E-14  | 57  | -0.038 | 0.036  | 0.288 |
| rs247616    | LDL-C    | T  | C  | -0.055 | 0.004  | 2.57E-37  | 178 | 0.038  | 0.037  | 0.308 |
| rs2495495   | LDL-C    | C  | T  | -0.034 | 0.006  | 3.52E-08  | 34  | 0.033  | 0.047  | 0.488 |
| rs2587534   | LDL-C    | A  | G  | 0.039  | 0.004  | 8.06E-25  | 112 | -0.013 | 0.034  | 0.699 |
| rs2642438   | LDL-C    | G  | A  | 0.035  | 0.004  | 7.32E-16  | 70  | -0.035 | 0.038  | 0.350 |
| rs267733    | LDL-C    | G  | A  | -0.033 | 0.005  | 5.29E-09  | 39  | -0.046 | 0.048  | 0.338 |
| rs2710642   | LDL-C    | A  | G  | 0.024  | 0.004  | 6.09E-09  | 40  | -0.045 | 0.035  | 0.194 |
| rs2737252   | LDL-C    | A  | G  | -0.031 | 0.004  | 7.04E-14  | 59  | 0.028  | 0.036  | 0.449 |
| rs2738459   | LDL-C    | C  | A  | -0.053 | 0.006  | 2.26E-19  | 84  | -0.005 | 0.034  | 0.873 |
| rs2965157   | LDL-C    | C  | T  | -0.189 | 0.011  | 7.29E-62  | 284 | 0.066  | 0.085  | 0.440 |
| rs314253    | LDL-C    | C  | T  | -0.024 | 0.004  | 3.44E-10  | 41  | -0.031 | 0.034  | 0.374 |
| rs364585    | LDL-C    | G  | A  | 0.025  | 0.004  | 4.28E-10  | 43  | 0.003  | 0.035  | 0.933 |



|            |       |   |   |        |       |           |      |        |       |       |
|------------|-------|---|---|--------|-------|-----------|------|--------|-------|-------|
| rs3780181  | LDL-C | G | A | -0.045 | 0.007 | 1.76E-09  | 36   | -0.049 | 0.074 | 0.511 |
| rs4253776  | LDL-C | G | A | 0.031  | 0.006 | 3.35E-08  | 28   | -0.044 | 0.061 | 0.475 |
| rs4530754  | LDL-C | A | G | 0.028  | 0.004 | 3.58E-12  | 58   | -0.014 | 0.034 | 0.680 |
| rs4722551  | LDL-C | C | T | 0.039  | 0.005 | 3.95E-14  | 64   | -0.013 | 0.041 | 0.761 |
| rs4942486  | LDL-C | C | T | -0.024 | 0.004 | 2.26E-11  | 43   | 0.024  | 0.034 | 0.472 |
| rs4970712  | LDL-C | C | A | 0.034  | 0.004 | 2.46E-13  | 59   | 0.000  | 0.040 | 0.998 |
| rs4970834  | LDL-C | T | C | -0.150 | 0.005 | 1.00E-200 | 1023 | 0.025  | 0.042 | 0.561 |
| rs5763662  | LDL-C | T | C | 0.077  | 0.012 | 1.19E-08  | 40   | 0.052  | 0.093 | 0.579 |
| rs6016373  | LDL-C | G | A | -0.035 | 0.004 | 7.95E-19  | 89   | -0.040 | 0.035 | 0.260 |
| rs6504872  | LDL-C | T | C | 0.027  | 0.004 | 3.48E-13  | 55   | 0.028  | 0.034 | 0.401 |
| rs6511720  | LDL-C | T | G | -0.221 | 0.006 | 1.00E-200 | 1311 | -0.019 | 0.056 | 0.732 |
| rs6544713  | LDL-C | C | T | -0.081 | 0.004 | 4.84E-83  | 386  | 0.017  | 0.041 | 0.675 |
| rs6693893  | LDL-C | C | T | -0.077 | 0.013 | 2.88E-08  | 34   | -0.060 | 0.077 | 0.432 |
| rs6709904  | LDL-C | G | A | -0.055 | 0.009 | 4.58E-10  | 42   | 0.006  | 0.056 | 0.917 |
| rs6818397  | LDL-C | G | T | -0.022 | 0.004 | 1.68E-08  | 31   | -0.049 | 0.038 | 0.193 |
| rs6882076  | LDL-C | C | T | 0.046  | 0.004 | 3.31E-31  | 144  | -0.012 | 0.036 | 0.737 |
| rs6909746  | LDL-C | T | C | -0.026 | 0.004 | 7.86E-11  | 51   | 0.045  | 0.034 | 0.187 |
| rs7254892  | LDL-C | A | G | -0.485 | 0.012 | 1.00E-200 | 1663 | -0.089 | 0.113 | 0.429 |
| rs72902576 | LDL-C | G | T | -0.093 | 0.013 | 9.58E-12  | 49   | 0.035  | 0.079 | 0.656 |
| rs7551981  | LDL-C | T | G | 0.047  | 0.004 | 1.36E-33  | 154  | -0.038 | 0.034 | 0.259 |
| rs75687619 | LDL-C | T | G | 0.174  | 0.016 | 8.05E-24  | 116  | 0.090  | 0.112 | 0.420 |
| rs7640978  | LDL-C | T | C | -0.039 | 0.007 | 9.84E-09  | 32   | 0.024  | 0.061 | 0.692 |
| rs7832643  | LDL-C | T | G | 0.034  | 0.004 | 2.67E-17  | 80   | -0.024 | 0.034 | 0.478 |
| rs8017377  | LDL-C | A | G | 0.030  | 0.004 | 2.52E-15  | 64   | -0.049 | 0.035 | 0.157 |

LDL-C, low-density lipoprotein cholesterol. EA: effect allele. OA: other allele. EAF: EA frequency. GX: beta-exposure. GX(SE): standard error of GX. GY: beta-outcome. GY(SE): standard error of GY.

**Table S8. Published associations of HDL-C and TB**

| SNP        | Exposure | EA | OA | GX     | GX(SE) | pval      | F   | GY     | GY(SE) | pval  |
|------------|----------|----|----|--------|--------|-----------|-----|--------|--------|-------|
| rs10019888 | HDL-C    | G  | A  | -0.027 | 0.005  | 4.90E-08  | 34  | 0.071  | 0.049  | 0.153 |
| rs10087900 | HDL-C    | A  | G  | -0.023 | 0.004  | 2.17E-09  | 41  | 0.007  | 0.035  | 0.833 |
| rs103294   | HDL-C    | T  | C  | 0.052  | 0.004  | 3.99E-30  | 141 | 0.035  | 0.037  | 0.337 |
| rs11045163 | HDL-C    | G  | A  | 0.022  | 0.004  | 3.20E-09  | 38  | 0.028  | 0.035  | 0.411 |
| rs11765979 | HDL-C    | C  | A  | 0.041  | 0.005  | 3.11E-17  | 74  | 0.049  | 0.034  | 0.146 |
| rs11789603 | HDL-C    | T  | C  | 0.060  | 0.006  | 3.69E-21  | 100 | -0.048 | 0.064  | 0.456 |
| rs12133576 | HDL-C    | G  | A  | -0.024 | 0.004  | 6.15E-11  | 48  | -0.066 | 0.035  | 0.062 |
| rs12145743 | HDL-C    | G  | T  | 0.020  | 0.004  | 1.80E-08  | 32  | 0.015  | 0.035  | 0.672 |
| rs12412743 | HDL-C    | T  | C  | -0.029 | 0.005  | 1.31E-09  | 42  | -0.028 | 0.046  | 0.542 |
| rs12740374 | HDL-C    | T  | G  | 0.034  | 0.004  | 1.69E-15  | 70  | 0.028  | 0.041  | 0.501 |
| rs12748152 | HDL-C    | T  | C  | -0.051 | 0.006  | 9.74E-16  | 67  | 0.022  | 0.063  | 0.725 |
| rs13076253 | HDL-C    | C  | A  | -0.028 | 0.005  | 4.96E-09  | 35  | -0.036 | 0.043  | 0.410 |
| rs13099479 | HDL-C    | A  | G  | 0.036  | 0.006  | 1.82E-08  | 34  | -0.067 | 0.062  | 0.286 |
| rs13702    | HDL-C    | C  | T  | 0.106  | 0.004  | 1.28E-160 | 775 | 0.034  | 0.038  | 0.370 |
| rs1515110  | HDL-C    | T  | G  | -0.032 | 0.004  | 8.04E-18  | 85  | 0.028  | 0.035  | 0.417 |
| rs1689797  | HDL-C    | A  | C  | -0.036 | 0.004  | 2.85E-21  | 99  | -0.011 | 0.037  | 0.771 |
| rs16965220 | HDL-C    | A  | C  | 0.022  | 0.004  | 7.91E-09  | 35  | 0.009  | 0.037  | 0.814 |
| rs17173637 | HDL-C    | C  | T  | -0.036 | 0.006  | 1.90E-08  | 41  | -0.038 | 0.048  | 0.426 |
| rs1866956  | HDL-C    | T  | C  | 0.022  | 0.004  | 7.96E-10  | 34  | -0.023 | 0.035  | 0.510 |
| rs1883025  | HDL-C    | T  | C  | -0.070 | 0.004  | 1.50E-65  | 290 | -0.076 | 0.042  | 0.072 |
| rs205262   | HDL-C    | G  | A  | -0.028 | 0.004  | 3.88E-13  | 53  | 0.049  | 0.038  | 0.191 |
| rs2066714  | HDL-C    | C  | T  | 0.045  | 0.007  | 7.26E-10  | 41  | 0.036  | 0.058  | 0.535 |
| rs2075650  | HDL-C    | G  | A  | -0.055 | 0.005  | 9.72E-26  | 118 | 0.010  | 0.045  | 0.817 |
| rs2241210  | HDL-C    | G  | A  | 0.033  | 0.004  | 2.49E-20  | 90  | 0.017  | 0.034  | 0.607 |
| rs2241770  | HDL-C    | C  | T  | -0.099 | 0.006  | 6.78E-60  | 301 | -0.101 | 0.054  | 0.064 |
| rs2250802  | HDL-C    | A  | G  | -0.034 | 0.004  | 2.02E-17  | 80  | -0.042 | 0.036  | 0.247 |
| rs2278236  | HDL-C    | A  | G  | 0.033  | 0.004  | 3.18E-18  | 89  | 0.009  | 0.034  | 0.801 |
| rs2290547  | HDL-C    | A  | G  | -0.030 | 0.005  | 3.69E-09  | 42  | 0.002  | 0.040  | 0.960 |
| rs2454722  | HDL-C    | G  | A  | 0.035  | 0.004  | 3.31E-14  | 64  | 0.009  | 0.046  | 0.840 |
| rs2602836  | HDL-C    | G  | A  | -0.019 | 0.003  | 4.96E-08  | 32  | 0.012  | 0.034  | 0.717 |
| rs2606736  | HDL-C    | T  | C  | -0.025 | 0.004  | 4.80E-08  | 33  | 0.013  | 0.034  | 0.707 |
| rs2642438  | HDL-C    | G  | A  | 0.030  | 0.004  | 7.78E-14  | 60  | -0.035 | 0.038  | 0.350 |
| rs2925979  | HDL-C    | C  | T  | 0.035  | 0.004  | 1.32E-19  | 90  | 0.056  | 0.036  | 0.119 |
| rs3741414  | HDL-C    | T  | C  | 0.030  | 0.004  | 6.10E-14  | 55  | 0.022  | 0.040  | 0.588 |
| rs3847502  | HDL-C    | A  | C  | 0.048  | 0.004  | 3.31E-38  | 178 | 0.036  | 0.034  | 0.297 |
| rs4142995  | HDL-C    | T  | G  | -0.026 | 0.004  | 9.36E-12  | 51  | -0.004 | 0.037  | 0.920 |
| rs4148005  | HDL-C    | G  | T  | -0.028 | 0.004  | 5.74E-14  | 62  | -0.005 | 0.037  | 0.888 |
| rs424346   | HDL-C    | T  | C  | 0.068  | 0.011  | 4.84E-08  | 36  | -0.018 | 0.090  | 0.842 |
| rs4379922  | HDL-C    | C  | T  | 0.025  | 0.004  | 9.56E-12  | 47  | 0.037  | 0.035  | 0.285 |

|           |       |   |   |        |       |           |      |        |       |       |
|-----------|-------|---|---|--------|-------|-----------|------|--------|-------|-------|
| rs4650994 | HDL-C | A | G | -0.021 | 0.003 | 6.70E-09  | 38   | -0.001 | 0.034 | 0.988 |
| rs4846914 | HDL-C | A | G | 0.048  | 0.003 | 3.51E-41  | 198  | 0.000  | 0.034 | 0.999 |
| rs4917014 | HDL-C | G | T | 0.022  | 0.004 | 1.03E-08  | 38   | 0.011  | 0.036 | 0.769 |
| rs4939883 | HDL-C | C | T | 0.080  | 0.005 | 1.80E-66  | 315  | -0.003 | 0.044 | 0.951 |
| rs4983559 | HDL-C | A | G | -0.020 | 0.004 | 9.57E-09  | 30   | 0.006  | 0.035 | 0.866 |
| rs6031587 | HDL-C | T | C | -0.049 | 0.007 | 1.92E-09  | 43   | 0.036  | 0.065 | 0.578 |
| rs633695  | HDL-C | G | A | 0.089  | 0.005 | 7.82E-58  | 269  | 0.029  | 0.037 | 0.429 |
| rs6450176 | HDL-C | A | G | -0.025 | 0.004 | 6.87E-10  | 42   | -0.001 | 0.039 | 0.971 |
| rs676210  | HDL-C | A | G | 0.066  | 0.004 | 2.34E-54  | 272  | -0.031 | 0.038 | 0.415 |
| rs6805251 | HDL-C | C | T | -0.020 | 0.004 | 1.33E-08  | 33   | -0.044 | 0.034 | 0.200 |
| rs686030  | HDL-C | A | C | 0.055  | 0.005 | 4.29E-27  | 126  | -0.042 | 0.052 | 0.423 |
| rs687339  | HDL-C | T | C | -0.032 | 0.004 | 7.11E-13  | 57   | -0.039 | 0.047 | 0.404 |
| rs702485  | HDL-C | G | A | 0.024  | 0.003 | 6.45E-12  | 51   | -0.010 | 0.034 | 0.769 |
| rs7306660 | HDL-C | A | G | -0.035 | 0.004 | 3.34E-19  | 92   | -0.006 | 0.036 | 0.873 |
| rs731839  | HDL-C | A | G | 0.022  | 0.004 | 3.44E-09  | 35   | -0.007 | 0.035 | 0.853 |
| rs737337  | HDL-C | C | T | -0.057 | 0.006 | 4.56E-17  | 86   | -0.037 | 0.059 | 0.532 |
| rs838876  | HDL-C | G | A | -0.049 | 0.004 | 7.32E-33  | 160  | 0.000  | 0.034 | 0.989 |
| rs9457931 | HDL-C | G | A | -0.055 | 0.007 | 7.30E-13  | 57   | 0.001  | 0.053 | 0.985 |
| rs9989419 | HDL-C | G | A | 0.147  | 0.004 | 1.00E-200 | 1674 | 0.019  | 0.035 | 0.589 |

HDL-C, high-density lipoprotein cholesterol. EA: effect allele. OA: other allele. EAF: EA frequency. GX: beta-exposure. GX(SE): standard error of GX. GY: beta-outcome. GY(SE): standard error of GY.

**Table S9. Published associations of TG on PTB**

| SNP        | Exposure | EA | OA | GX     | GX(SE) | pval      | F   | GY     | GY(SE) | pval  |
|------------|----------|----|----|--------|--------|-----------|-----|--------|--------|-------|
| rs10401969 | TG       | C  | T  | -0.121 | 0.007  | 9.70E-70  | 347 | 0.080  | 0.069  | 0.250 |
| rs10440120 | TG       | A  | C  | -0.031 | 0.004  | 5.34E-11  | 48  | 0.011  | 0.042  | 0.784 |
| rs10501321 | TG       | C  | T  | -0.022 | 0.004  | 1.41E-08  | 38  | 0.035  | 0.034  | 0.303 |
| rs11057408 | TG       | T  | G  | -0.026 | 0.004  | 2.05E-12  | 54  | -0.059 | 0.037  | 0.106 |
| rs11613352 | TG       | T  | C  | -0.028 | 0.004  | 9.40E-14  | 52  | 0.023  | 0.040  | 0.558 |
| rs12280753 | TG       | T  | C  | 0.193  | 0.006  | 1.22E-179 | 910 | 0.079  | 0.065  | 0.227 |
| rs12676857 | TG       | C  | T  | 0.033  | 0.005  | 7.29E-12  | 52  | 0.050  | 0.043  | 0.250 |
| rs12748152 | TG       | T  | C  | 0.037  | 0.006  | 1.10E-09  | 40  | 0.022  | 0.063  | 0.725 |
| rs174535   | TG       | C  | T  | 0.047  | 0.003  | 1.73E-41  | 191 | 0.015  | 0.034  | 0.663 |
| rs2043085  | TG       | C  | T  | -0.033 | 0.003  | 7.81E-20  | 92  | 0.036  | 0.034  | 0.291 |
| rs2068888  | TG       | A  | G  | -0.024 | 0.003  | 1.68E-11  | 50  | 0.047  | 0.034  | 0.163 |
| rs2250802  | TG       | A  | G  | 0.023  | 0.004  | 1.21E-10  | 39  | -0.042 | 0.036  | 0.247 |
| rs247616   | TG       | T  | C  | -0.039 | 0.004  | 1.12E-25  | 113 | 0.038  | 0.037  | 0.308 |
| rs2665357  | TG       | C  | A  | 0.021  | 0.003  | 8.33E-10  | 41  | -0.029 | 0.034  | 0.392 |
| rs287621   | TG       | C  | T  | -0.022 | 0.004  | 7.67E-09  | 36  | -0.012 | 0.037  | 0.736 |
| rs2972146  | TG       | T  | G  | 0.028  | 0.003  | 2.97E-15  | 68  | 0.034  | 0.035  | 0.329 |
| rs3198697  | TG       | T  | C  | -0.020 | 0.003  | 2.21E-08  | 34  | -0.039 | 0.034  | 0.256 |
| rs3760627  | TG       | C  | T  | 0.019  | 0.003  | 5.29E-09  | 31  | 0.001  | 0.034  | 0.971 |
| rs3761445  | TG       | A  | G  | 0.023  | 0.003  | 8.06E-12  | 47  | 0.016  | 0.034  | 0.637 |
| rs38855    | TG       | G  | A  | -0.019 | 0.003  | 2.11E-08  | 32  | -0.040 | 0.034  | 0.236 |
| rs4587594  | TG       | A  | G  | -0.069 | 0.004  | 3.50E-82  | 393 | 0.023  | 0.038  | 0.545 |
| rs4719841  | TG       | G  | A  | 0.023  | 0.003  | 8.86E-11  | 47  | 0.004  | 0.035  | 0.913 |
| rs6029143  | TG       | T  | C  | -0.039 | 0.007  | 4.93E-08  | 30  | 0.022  | 0.092  | 0.810 |
| rs645040   | TG       | T  | G  | 0.029  | 0.004  | 1.83E-12  | 54  | -0.039 | 0.047  | 0.408 |
| rs676210   | TG       | A  | G  | -0.073 | 0.004  | 3.28E-71  | 353 | -0.031 | 0.038  | 0.415 |
| rs6831256  | TG       | G  | A  | 0.026  | 0.004  | 1.60E-12  | 54  | 0.024  | 0.035  | 0.489 |
| rs6882076  | TG       | C  | T  | 0.029  | 0.004  | 1.51E-15  | 67  | -0.012 | 0.036  | 0.737 |
| rs6995541  | TG       | G  | A  | 0.027  | 0.004  | 1.34E-12  | 51  | -0.004 | 0.038  | 0.910 |
| rs7248104  | TG       | A  | G  | -0.022 | 0.003  | 5.04E-10  | 43  | 0.030  | 0.034  | 0.374 |
| rs731839   | TG       | A  | G  | -0.022 | 0.004  | 2.65E-09  | 39  | -0.007 | 0.035  | 0.853 |
| rs8077889  | TG       | C  | A  | 0.025  | 0.004  | 9.88E-09  | 36  | 0.072  | 0.041  | 0.079 |
| rs948690   | TG       | C  | T  | -0.031 | 0.005  | 6.57E-09  | 35  | -0.004 | 0.040  | 0.929 |

TG, triglycerides. EA: effect allele. OA: other allele. EAF: EA frequency. GX: beta-exposure. GX(SE): standard error of GX. GY: beta-outcome. GY(SE): standard error of GY.

**Table S10. Published associations of TC on PTB**

| SNP         | Exposure | EA | OA | GX     | GX(SE) | pval     | F   | GY     | GY(SE) | pval  |
|-------------|----------|----|----|--------|--------|----------|-----|--------|--------|-------|
| rs10088180  | TC       | G  | A  | -0.023 | 0.004  | 6.02E-10 | 32  | 0.040  | 0.036  | 0.258 |
| rs10773003  | TC       | A  | G  | 0.037  | 0.006  | 4.08E-09 | 40  | -0.022 | 0.053  | 0.682 |
| rs10832962  | TC       | T  | C  | 0.032  | 0.004  | 1.54E-14 | 65  | 0.043  | 0.035  | 0.217 |
| rs10904908  | TC       | G  | A  | 0.025  | 0.004  | 2.60E-11 | 48  | -0.015 | 0.034  | 0.659 |
| rs11153594  | TC       | T  | C  | -0.029 | 0.004  | 1.27E-14 | 65  | 0.045  | 0.034  | 0.187 |
| rs112201728 | TC       | T  | C  | 0.058  | 0.010  | 1.20E-08 | 34  | -0.100 | 0.072  | 0.163 |
| rs11220462  | TC       | A  | G  | 0.047  | 0.006  | 5.49E-15 | 67  | 0.058  | 0.043  | 0.179 |
| rs11563251  | TC       | T  | C  | 0.037  | 0.006  | 1.27E-09 | 39  | -0.006 | 0.057  | 0.909 |
| rs11591147  | TC       | T  | G  | -0.334 | 0.017  | 8.83E-86 | 373 | -0.057 | 0.091  | 0.532 |
| rs11694172  | TC       | G  | A  | 0.028  | 0.004  | 1.95E-09 | 46  | 0.025  | 0.045  | 0.584 |
| rs11753995  | TC       | A  | G  | 0.049  | 0.005  | 1.84E-23 | 104 | -0.076 | 0.048  | 0.116 |
| rs11789603  | TC       | T  | C  | 0.043  | 0.006  | 1.44E-11 | 47  | -0.048 | 0.064  | 0.456 |
| rs12412743  | TC       | T  | C  | -0.030 | 0.005  | 6.98E-10 | 40  | -0.028 | 0.046  | 0.542 |
| rs12670798  | TC       | C  | T  | 0.036  | 0.004  | 9.48E-17 | 79  | 0.030  | 0.039  | 0.444 |
| rs12916     | TC       | C  | T  | 0.068  | 0.004  | 4.55E-74 | 361 | -0.031 | 0.034  | 0.355 |
| rs13315871  | TC       | A  | G  | -0.036 | 0.006  | 3.48E-08 | 34  | -0.120 | 0.060  | 0.045 |
| rs138777    | TC       | G  | A  | -0.021 | 0.004  | 4.74E-08 | 33  | 0.008  | 0.034  | 0.822 |
| rs17526895  | TC       | G  | A  | -0.042 | 0.007  | 5.78E-09 | 39  | 0.124  | 0.065  | 0.055 |
| rs1883025   | TC       | T  | C  | -0.067 | 0.004  | 5.75E-53 | 255 | -0.076 | 0.042  | 0.072 |
| rs1997243   | TC       | G  | A  | 0.033  | 0.005  | 2.72E-10 | 44  | -0.077 | 0.051  | 0.129 |
| rs2000999   | TC       | A  | G  | 0.062  | 0.004  | 6.80E-41 | 197 | 0.007  | 0.042  | 0.873 |
| rs2030746   | TC       | T  | C  | 0.020  | 0.004  | 3.60E-08 | 29  | 0.053  | 0.035  | 0.130 |
| rs2066714   | TC       | C  | T  | 0.044  | 0.008  | 1.14E-08 | 34  | 0.036  | 0.058  | 0.535 |
| rs2073547   | TC       | G  | A  | 0.046  | 0.005  | 3.83E-21 | 94  | -0.017 | 0.036  | 0.631 |
| rs2156552   | TC       | T  | A  | 0.057  | 0.005  | 1.25E-31 | 147 | -0.003 | 0.044  | 0.940 |
| rs2228603   | TC       | T  | C  | -0.122 | 0.007  | 1.05E-62 | 311 | 0.077  | 0.067  | 0.252 |
| rs2255141   | TC       | G  | A  | -0.031 | 0.004  | 6.51E-16 | 65  | -0.040 | 0.036  | 0.265 |
| rs2277862   | TC       | T  | C  | -0.035 | 0.005  | 5.26E-11 | 45  | 0.079  | 0.059  | 0.177 |
| rs2315065   | TC       | A  | C  | 0.110  | 0.016  | 1.10E-11 | 49  | 0.084  | 0.069  | 0.228 |
| rs247616    | TC       | T  | C  | 0.050  | 0.004  | 4.47E-32 | 156 | 0.038  | 0.037  | 0.308 |
| rs2642438   | TC       | G  | A  | 0.037  | 0.004  | 1.28E-18 | 86  | -0.035 | 0.038  | 0.350 |
| rs2737252   | TC       | A  | G  | -0.033 | 0.004  | 1.63E-16 | 72  | 0.028  | 0.036  | 0.449 |
| rs2738459   | TC       | C  | A  | -0.039 | 0.006  | 2.11E-11 | 46  | -0.005 | 0.034  | 0.873 |
| rs281393    | TC       | T  | C  | -0.032 | 0.006  | 4.26E-08 | 34  | -0.046 | 0.034  | 0.184 |
| rs2814982   | TC       | T  | C  | -0.044 | 0.006  | 3.68E-15 | 60  | 0.105  | 0.046  | 0.023 |
| rs314253    | TC       | C  | T  | -0.023 | 0.004  | 2.81E-10 | 40  | -0.031 | 0.034  | 0.374 |
| rs3780181   | TC       | G  | A  | -0.044 | 0.007  | 6.67E-10 | 39  | -0.049 | 0.074  | 0.511 |
| rs386003    | TC       | T  | G  | 0.034  | 0.006  | 4.52E-08 | 35  | 0.030  | 0.036  | 0.405 |
| rs4253772   | TC       | T  | C  | 0.032  | 0.006  | 9.85E-09 | 31  | -0.042 | 0.062  | 0.503 |

|            |    |   |   |        |       |           |      |        |       |       |
|------------|----|---|---|--------|-------|-----------|------|--------|-------|-------|
| rs4530754  | TC | A | G | 0.023  | 0.004 | 1.68E-09  | 42   | -0.014 | 0.034 | 0.680 |
| rs4883201  | TC | G | A | -0.035 | 0.006 | 1.74E-09  | 39   | 0.045  | 0.052 | 0.385 |
| rs4988235  | TC | A | G | -0.031 | 0.004 | 3.97E-14  | 59   | -0.022 | 0.035 | 0.523 |
| rs515135   | TC | C | T | 0.124  | 0.005 | 6.38E-151 | 724  | -0.019 | 0.043 | 0.661 |
| rs558971   | TC | G | A | 0.040  | 0.004 | 7.02E-28  | 122  | -0.011 | 0.034 | 0.750 |
| rs581080   | TC | C | G | 0.038  | 0.005 | 1.02E-13  | 64   | -0.059 | 0.048 | 0.218 |
| rs6016373  | TC | G | A | -0.032 | 0.004 | 1.00E-17  | 79   | -0.040 | 0.035 | 0.260 |
| rs633695   | TC | G | A | 0.043  | 0.006 | 1.05E-14  | 56   | 0.029  | 0.037 | 0.429 |
| rs646776   | TC | T | C | 0.127  | 0.004 | 4.78E-187 | 917  | -0.027 | 0.041 | 0.513 |
| rs6504872  | TC | T | C | 0.025  | 0.004 | 6.99E-12  | 51   | 0.028  | 0.034 | 0.401 |
| rs6511720  | TC | T | G | -0.185 | 0.006 | 1.00E-200 | 984  | -0.019 | 0.056 | 0.732 |
| rs6544713  | TC | C | T | -0.077 | 0.004 | 1.69E-81  | 373  | 0.017  | 0.041 | 0.675 |
| rs6573778  | TC | C | T | -0.026 | 0.004 | 2.96E-11  | 45   | 0.023  | 0.034 | 0.506 |
| rs6603981  | TC | T | C | 0.035  | 0.004 | 7.85E-15  | 67   | 0.001  | 0.040 | 0.989 |
| rs6709904  | TC | G | A | -0.055 | 0.008 | 8.39E-10  | 43   | 0.006  | 0.056 | 0.917 |
| rs6818397  | TC | G | T | -0.025 | 0.004 | 9.51E-11  | 42   | -0.049 | 0.038 | 0.193 |
| rs6882076  | TC | C | T | 0.051  | 0.004 | 5.35E-41  | 189  | -0.012 | 0.036 | 0.737 |
| rs7412     | TC | T | C | -0.374 | 0.010 | 1.00E-200 | 1514 | -0.149 | 0.074 | 0.044 |
| rs7551981  | TC | T | G | 0.036  | 0.004 | 7.50E-22  | 94   | -0.038 | 0.034 | 0.259 |
| rs75687619 | TC | T | G | 0.159  | 0.015 | 3.61E-22  | 108  | 0.090  | 0.112 | 0.420 |
| rs7640978  | TC | T | C | -0.038 | 0.007 | 1.66E-08  | 32   | 0.024  | 0.061 | 0.692 |
| rs7832643  | TC | T | G | 0.029  | 0.004 | 3.12E-13  | 61   | -0.024 | 0.034 | 0.478 |
| rs8103315  | TC | A | C | 0.042  | 0.006 | 5.94E-15  | 59   | -0.034 | 0.043 | 0.433 |
| rs9306897  | TC | C | T | -0.049 | 0.004 | 7.51E-37  | 174  | -0.014 | 0.035 | 0.686 |

TC, total cholesterol. EA: effect allele. OA: other allele. EAF: EA frequency. GX: beta-exposure. GX(SE): standard error of GX. GY: beta-outcome. GY(SE): standard error of GY.

**Table S11. Published associations of BMI on PTB**

| SNP        | Exposure | EA | OA | GX     | GX(SE) | pval     | F   | GY     | GY(SE) | pval  |
|------------|----------|----|----|--------|--------|----------|-----|--------|--------|-------|
| rs1000940  | BMI      | G  | A  | 0.019  | 0.003  | 1.28E-08 | 32  | -0.042 | 0.034  | 0.220 |
| rs10132280 | BMI      | A  | C  | -0.023 | 0.003  | 1.14E-11 | 46  | 0.026  | 0.035  | 0.462 |
| rs1016287  | BMI      | C  | T  | -0.023 | 0.003  | 2.25E-11 | 45  | -0.034 | 0.039  | 0.381 |
| rs10182181 | BMI      | G  | A  | 0.031  | 0.003  | 8.78E-24 | 98  | -0.013 | 0.034  | 0.700 |
| rs10733682 | BMI      | G  | A  | -0.017 | 0.003  | 1.83E-08 | 32  | -0.002 | 0.034  | 0.964 |
| rs10938397 | BMI      | G  | A  | 0.040  | 0.003  | 3.20E-38 | 168 | 0.020  | 0.034  | 0.550 |
| rs10968576 | BMI      | G  | A  | 0.025  | 0.003  | 6.61E-14 | 57  | 0.000  | 0.035  | 0.994 |
| rs11057405 | BMI      | A  | G  | -0.031 | 0.006  | 2.02E-08 | 31  | 0.005  | 0.058  | 0.927 |
| rs11165643 | BMI      | T  | C  | 0.022  | 0.003  | 2.07E-12 | 49  | -0.041 | 0.034  | 0.237 |
| rs1167827  | BMI      | G  | A  | 0.020  | 0.003  | 6.33E-10 | 37  | -0.029 | 0.034  | 0.393 |
| rs11727676 | BMI      | C  | T  | -0.036 | 0.006  | 2.55E-08 | 31  | -0.102 | 0.060  | 0.090 |
| rs12286929 | BMI      | G  | A  | 0.022  | 0.003  | 1.31E-12 | 49  | -0.039 | 0.034  | 0.253 |
| rs12429545 | BMI      | A  | G  | 0.033  | 0.005  | 1.09E-12 | 51  | -0.007 | 0.049  | 0.887 |
| rs12940622 | BMI      | A  | G  | -0.018 | 0.003  | 2.49E-09 | 34  | 0.031  | 0.035  | 0.381 |
| rs12986742 | BMI      | C  | T  | 0.021  | 0.004  | 1.01E-08 | 33  | -0.021 | 0.034  | 0.537 |
| rs13191362 | BMI      | G  | A  | -0.028 | 0.005  | 7.34E-09 | 33  | 0.015  | 0.070  | 0.831 |
| rs1516725  | BMI      | C  | T  | 0.045  | 0.005  | 1.89E-22 | 96  | -0.027 | 0.056  | 0.633 |
| rs1528435  | BMI      | T  | C  | 0.018  | 0.003  | 1.20E-08 | 33  | -0.003 | 0.035  | 0.934 |
| rs16851483 | BMI      | T  | G  | 0.048  | 0.008  | 3.55E-10 | 39  | 0.052  | 0.078  | 0.503 |
| rs16951275 | BMI      | C  | T  | -0.031 | 0.004  | 1.91E-17 | 71  | 0.065  | 0.046  | 0.153 |
| rs17001654 | BMI      | G  | C  | 0.031  | 0.005  | 7.76E-09 | 33  | -0.049 | 0.053  | 0.360 |
| rs17024393 | BMI      | C  | T  | 0.066  | 0.009  | 7.03E-14 | 56  | -0.168 | 0.074  | 0.023 |
| rs17094222 | BMI      | C  | T  | 0.025  | 0.004  | 5.94E-11 | 43  | -0.035 | 0.039  | 0.377 |
| rs17405819 | BMI      | C  | T  | -0.022 | 0.003  | 2.07E-11 | 46  | 0.022  | 0.037  | 0.552 |
| rs17724992 | BMI      | G  | A  | -0.019 | 0.004  | 3.41E-08 | 31  | -0.054 | 0.040  | 0.181 |
| rs1928295  | BMI      | C  | T  | -0.019 | 0.003  | 7.91E-10 | 37  | 0.011  | 0.034  | 0.749 |
| rs2033529  | BMI      | G  | A  | 0.019  | 0.003  | 1.39E-08 | 33  | 0.038  | 0.036  | 0.292 |
| rs2033732  | BMI      | C  | T  | 0.019  | 0.004  | 4.89E-08 | 30  | 0.028  | 0.039  | 0.479 |
| rs205262   | BMI      | G  | A  | 0.022  | 0.004  | 1.75E-10 | 40  | 0.049  | 0.038  | 0.191 |
| rs2112347  | BMI      | G  | T  | -0.026 | 0.003  | 6.19E-17 | 71  | -0.040 | 0.034  | 0.237 |
| rs2121279  | BMI      | T  | C  | 0.025  | 0.004  | 2.31E-08 | 31  | 0.008  | 0.040  | 0.836 |
| rs2176598  | BMI      | C  | T  | -0.020 | 0.004  | 2.97E-08 | 30  | 0.048  | 0.038  | 0.208 |
| rs2207139  | BMI      | G  | A  | 0.045  | 0.004  | 4.13E-29 | 125 | -0.040 | 0.042  | 0.333 |
| rs2245368  | BMI      | T  | C  | -0.032 | 0.006  | 3.19E-08 | 31  | 0.004  | 0.041  | 0.918 |
| rs2287019  | BMI      | T  | C  | -0.036 | 0.004  | 4.58E-18 | 73  | -0.072 | 0.040  | 0.072 |
| rs2365389  | BMI      | T  | C  | -0.020 | 0.003  | 1.63E-10 | 42  | 0.003  | 0.034  | 0.930 |
| rs2820292  | BMI      | C  | A  | 0.020  | 0.003  | 1.83E-10 | 40  | 0.014  | 0.034  | 0.674 |
| rs29941    | BMI      | G  | A  | 0.018  | 0.003  | 2.41E-08 | 30  | -0.019 | 0.034  | 0.586 |
| rs3736485  | BMI      | G  | A  | -0.018 | 0.003  | 7.41E-09 | 32  | 0.034  | 0.034  | 0.318 |

|           |     |   |   |        |       |          |     |        |       |       |
|-----------|-----|---|---|--------|-------|----------|-----|--------|-------|-------|
| rs3849570 | BMI | A | C | 0.019  | 0.003 | 2.60E-08 | 31  | 0.028  | 0.034 | 0.416 |
| rs4256980 | BMI | G | C | 0.021  | 0.003 | 2.90E-11 | 45  | -0.070 | 0.035 | 0.047 |
| rs4740619 | BMI | C | T | -0.018 | 0.003 | 4.56E-09 | 33  | -0.060 | 0.034 | 0.077 |
| rs543874  | BMI | G | A | 0.048  | 0.004 | 2.62E-35 | 153 | -0.013 | 0.044 | 0.766 |
| rs6477694 | BMI | T | C | -0.017 | 0.003 | 2.67E-08 | 32  | -0.060 | 0.034 | 0.084 |
| rs657452  | BMI | G | A | -0.023 | 0.003 | 5.48E-13 | 54  | -0.011 | 0.034 | 0.755 |
| rs6804842 | BMI | G | A | 0.019  | 0.003 | 2.48E-09 | 36  | -0.031 | 0.034 | 0.352 |
| rs7138803 | BMI | A | G | 0.032  | 0.003 | 8.15E-24 | 103 | -0.021 | 0.035 | 0.546 |
| rs7141420 | BMI | T | C | 0.024  | 0.003 | 1.23E-14 | 57  | 0.027  | 0.034 | 0.432 |
| rs758747  | BMI | T | C | 0.023  | 0.004 | 7.47E-10 | 37  | 0.031  | 0.042 | 0.455 |
| rs7599312 | BMI | A | G | -0.022 | 0.003 | 1.17E-10 | 42  | 0.020  | 0.037 | 0.578 |
| rs7899106 | BMI | G | A | 0.040  | 0.007 | 2.96E-08 | 31  | -0.074 | 0.082 | 0.366 |
| rs7903146 | BMI | T | C | -0.023 | 0.003 | 1.11E-11 | 47  | -0.020 | 0.042 | 0.633 |
| rs879620  | BMI | T | C | 0.024  | 0.004 | 1.06E-09 | 37  | -0.018 | 0.034 | 0.592 |
| rs9400239 | BMI | C | T | 0.019  | 0.003 | 1.61E-08 | 32  | 0.014  | 0.035 | 0.681 |
| rs9579083 | BMI | C | G | 0.030  | 0.005 | 3.46E-10 | 39  | 0.049  | 0.040 | 0.221 |
| rs9926784 | BMI | C | T | -0.027 | 0.004 | 1.85E-10 | 40  | 0.050  | 0.045 | 0.259 |

BMI: body mass index. EA: effect allele. OA: other allele. EAF: EA frequency. GX: beta-exposure. GX(SE): standard error of GX.

GY: beta-outcome. GY(SE): standard error of GY.



**Table S12. Published associations of WHR on PTB**

| SNP        | Exposure | EA | OA | GX     | GX(SE) | pval     | F  | GY     | GX(SE) | pval  |
|------------|----------|----|----|--------|--------|----------|----|--------|--------|-------|
| rs1011731  | WHR      | A  | G  | -0.019 | 0.003  | 1.10E-08 | 33 | -0.041 | 0.034  | 0.224 |
| rs10245353 | WHR      | A  | C  | 0.027  | 0.004  | 1.60E-10 | 41 | -0.022 | 0.038  | 0.563 |
| rs10783615 | WHR      | A  | G  | -0.035 | 0.005  | 7.00E-13 | 51 | 0.020  | 0.045  | 0.657 |
| rs11048470 | WHR      | T  | G  | 0.025  | 0.004  | 6.30E-12 | 46 | 0.010  | 0.036  | 0.774 |
| rs1294421  | WHR      | G  | T  | 0.025  | 0.003  | 6.90E-14 | 54 | -0.016 | 0.034  | 0.645 |
| rs1316952  | WHR      | C  | T  | -0.028 | 0.005  | 7.30E-09 | 33 | 0.024  | 0.056  | 0.669 |
| rs1440372  | WHR      | C  | T  | 0.021  | 0.004  | 7.60E-09 | 32 | -0.014 | 0.039  | 0.713 |
| rs1563355  | WHR      | C  | T  | 0.031  | 0.004  | 1.70E-12 | 50 | 0.001  | 0.036  | 0.973 |
| rs1569135  | WHR      | G  | A  | -0.024 | 0.003  | 1.00E-12 | 53 | 0.102  | 0.034  | 0.002 |
| rs16996700 | WHR      | C  | T  | -0.021 | 0.004  | 1.60E-08 | 32 | -0.004 | 0.040  | 0.916 |
| rs2179129  | WHR      | G  | A  | -0.021 | 0.003  | 1.20E-09 | 38 | -0.030 | 0.035  | 0.387 |
| rs2287019  | WHR      | T  | C  | -0.026 | 0.005  | 4.30E-09 | 33 | -0.072 | 0.040  | 0.072 |
| rs2765539  | WHR      | T  | C  | 0.027  | 0.004  | 1.10E-12 | 50 | 0.003  | 0.047  | 0.944 |
| rs4640244  | WHR      | G  | A  | 0.021  | 0.004  | 3.10E-08 | 32 | 0.027  | 0.034  | 0.436 |
| rs4715213  | WHR      | T  | C  | 0.024  | 0.004  | 4.00E-08 | 30 | -0.042 | 0.042  | 0.315 |
| rs4929927  | WHR      | G  | A  | 0.020  | 0.003  | 7.60E-09 | 35 | -0.069 | 0.035  | 0.051 |
| rs929641   | WHR      | G  | A  | -0.020 | 0.003  | 4.20E-09 | 37 | -0.003 | 0.035  | 0.922 |
| rs9860730  | WHR      | G  | A  | -0.023 | 0.004  | 2.80E-10 | 41 | 0.048  | 0.037  | 0.192 |

WHR: waist-to-hip ratio. EA: effect allele. OA: other allele. EAF: EA frequency. GX: beta-exposure. GX(SE): standard error of GX.

GY: beta-outcome. GY(SE): standard error of GY.

**Table S13. Published associations of PTB on HbA1c**

| SNP         | Exposure | EA | OA | GX     | GX(SE) | pval     | F  | GY     | GY(SE) | pval  |
|-------------|----------|----|----|--------|--------|----------|----|--------|--------|-------|
| rs10847937  | PTB      | C  | A  | 0.176  | 0.038  | 3.20E-06 | 22 | 0.003  | 0.002  | 0.130 |
| rs117050744 | PTB      | C  | T  | -0.444 | 0.098  | 5.58E-06 | 21 | 0.011  | 0.013  | 0.400 |
| rs117620244 | PTB      | T  | C  | 0.361  | 0.070  | 2.49E-07 | 27 | -0.007 | 0.007  | 0.280 |
| rs118082956 | PTB      | G  | A  | 0.379  | 0.085  | 7.58E-06 | 20 | 0.000  | 0.007  | 0.970 |
| rs11926030  | PTB      | G  | T  | 0.417  | 0.094  | 8.66E-06 | 20 | -0.016 | 0.006  | 0.013 |
| rs13434036  | PTB      | T  | G  | -0.446 | 0.097  | 4.02E-06 | 21 | 0.001  | 0.004  | 0.790 |
| rs145653024 | PTB      | T  | C  | 0.802  | 0.161  | 6.46E-07 | 25 | -0.016 | 0.008  | 0.042 |
| rs2027204   | PTB      | A  | G  | 0.159  | 0.034  | 3.05E-06 | 22 | 0.000  | 0.002  | 0.880 |
| rs2395516   | PTB      | C  | T  | 0.176  | 0.034  | 2.20E-07 | 27 | -0.001 | 0.002  | 0.430 |
| rs6120438   | PTB      | A  | G  | -0.149 | 0.034  | 8.88E-06 | 20 | 0.002  | 0.002  | 0.280 |
| rs6586520   | PTB      | T  | C  | 0.155  | 0.034  | 4.32E-06 | 21 | -0.001 | 0.002  | 0.350 |
| rs6708458   | PTB      | G  | A  | 0.272  | 0.058  | 2.29E-06 | 22 | 0.003  | 0.002  | 0.120 |
| rs72836185  | PTB      | C  | T  | -0.730 | 0.164  | 8.41E-06 | 20 | 0.005  | 0.004  | 0.140 |
| rs73579425  | PTB      | T  | C  | 0.418  | 0.094  | 9.40E-06 | 20 | -0.007 | 0.005  | 0.190 |
| rs75686985  | PTB      | A  | C  | -0.160 | 0.035  | 5.03E-06 | 21 | 0.001  | 0.002  | 0.720 |

PTB: pulmonary tuberculosis. EA: effect allele. OA: other allele. EAF: EA frequency. GX: beta-exposure. GX(SE): standard error of GX. GY: beta-outcome. GY(SE): standard error of GY.

**Table S14. Published associations of PTB on FI**

| SNP         | Exposure | EA | OA | GX     | GX(SE) | pval     | F  | GY     | GY(SE) | pval  |
|-------------|----------|----|----|--------|--------|----------|----|--------|--------|-------|
| rs10847937  | PTB      | C  | A  | 0.176  | 0.038  | 3.20E-06 | 22 | 0.002  | 0.003  | 0.810 |
| rs117050744 | PTB      | C  | T  | -0.444 | 0.098  | 5.58E-06 | 21 | 0.009  | 0.011  | 0.230 |
| rs117620244 | PTB      | T  | C  | 0.361  | 0.070  | 2.49E-07 | 27 | -0.006 | 0.009  | 0.706 |
| rs118082956 | PTB      | G  | A  | 0.379  | 0.085  | 7.58E-06 | 20 | -0.008 | 0.009  | 0.502 |
| rs11926030  | PTB      | G  | T  | 0.417  | 0.094  | 8.66E-06 | 20 | 0.013  | 0.011  | 0.296 |
| rs13434036  | PTB      | T  | G  | -0.446 | 0.097  | 4.02E-06 | 21 | -0.003 | 0.006  | 0.359 |
| rs145653024 | PTB      | T  | C  | 0.802  | 0.161  | 6.46E-07 | 25 | 0.071  | 0.029  | 0.020 |
| rs2027204   | PTB      | A  | G  | 0.159  | 0.034  | 3.05E-06 | 22 | -0.003 | 0.002  | 0.110 |
| rs2395516   | PTB      | C  | T  | 0.176  | 0.034  | 2.20E-07 | 27 | 0.002  | 0.003  | 0.734 |
| rs6120438   | PTB      | A  | G  | -0.149 | 0.034  | 8.88E-06 | 20 | 0.001  | 0.002  | 0.657 |
| rs62201868  | PTB      | A  | G  | -2.155 | 0.487  | 9.75E-06 | 20 | 0.018  | 0.012  | 0.206 |
| rs6586520   | PTB      | T  | C  | 0.155  | 0.034  | 4.32E-06 | 21 | -0.002 | 0.002  | 0.616 |
| rs6708458   | PTB      | G  | A  | 0.272  | 0.058  | 2.29E-06 | 22 | 0.003  | 0.003  | 0.310 |
| rs72738736  | PTB      | T  | G  | 0.157  | 0.035  | 8.09E-06 | 20 | -0.001 | 0.002  | 0.292 |
| rs72836185  | PTB      | C  | T  | -0.730 | 0.164  | 8.41E-06 | 20 | 0.000  | 0.006  | 0.653 |
| rs73579425  | PTB      | T  | C  | 0.418  | 0.094  | 9.40E-06 | 20 | 0.012  | 0.011  | 0.233 |
| rs75686985  | PTB      | A  | C  | -0.160 | 0.035  | 5.03E-06 | 21 | 0.007  | 0.008  | 0.349 |
| rs79513808  | PTB      | T  | C  | 0.331  | 0.073  | 5.51E-06 | 21 | 0.001  | 0.005  | 0.627 |

PTB: pulmonary tuberculosis. EA: effect allele. OA: other allele. EAF: EA frequency. GX: beta-exposure. GX(SE): standard error of GX. GY: beta-outcome. GY(SE): standard error of GY.

**Table S15. Published associations of PTB on LDL-C**

| SNP        | Exposure | EA | OA | GX     | GX(SE) | pval     | F  | GY     | GY(SE) | pval  |
|------------|----------|----|----|--------|--------|----------|----|--------|--------|-------|
| rs10847937 | PTB      | C  | A  | 0.176  | 0.038  | 3.20E-06 | 22 | 0.008  | 0.006  | 0.226 |
| rs13434036 | PTB      | T  | G  | -0.446 | 0.097  | 4.02E-06 | 21 | -0.012 | 0.028  | 0.924 |
| rs2027204  | PTB      | A  | G  | 0.159  | 0.034  | 3.05E-06 | 22 | 0.004  | 0.005  | 0.681 |
| rs6708458  | PTB      | G  | A  | 0.272  | 0.058  | 2.29E-06 | 22 | 0.006  | 0.008  | 0.542 |
| rs72738736 | PTB      | T  | G  | 0.157  | 0.035  | 8.09E-06 | 20 | 0.005  | 0.006  | 0.363 |

PTB: pulmonary tuberculosis. EA: effect allele. OA: other allele. EAF: EA frequency. GX: beta-exposure. GX(SE): standard error of GX. GY: beta-outcome. GY(SE): standard error of GY.

**Table S16. Published associations of PTB on HDL-C**

| SNP        | Exposure | EA | OA | GX     | GX(SE) | pval     | F  | GY     | GY(SE) | pval  |
|------------|----------|----|----|--------|--------|----------|----|--------|--------|-------|
| rs10847937 | PTB      | C  | A  | 0.176  | 0.038  | 3.20E-06 | 22 | 0.002  | 0.006  | 0.917 |
| rs13434036 | PTB      | T  | G  | -0.446 | 0.097  | 4.02E-06 | 21 | 0.039  | 0.025  | 0.262 |
| rs2027204  | PTB      | A  | G  | 0.159  | 0.034  | 3.05E-06 | 22 | -0.002 | 0.005  | 0.853 |
| rs6708458  | PTB      | G  | A  | 0.272  | 0.058  | 2.29E-06 | 22 | -0.001 | 0.007  | 0.637 |
| rs72738736 | PTB      | T  | G  | 0.157  | 0.035  | 8.09E-06 | 20 | -0.008 | 0.005  | 0.150 |

PTB: pulmonary tuberculosis. EA: effect allele. OA: other allele. EAF: EA frequency. GX: beta-exposure. GX(SE): standard error of GX. GY: beta-outcome. GY(SE): standard error of GY.

**Table S17. Published associations of PTB on TG**

| SNP        | Exposure | EA | OA | GX     | GX(SE) | pval     | F  | GY     | GY(SE) | pval  |
|------------|----------|----|----|--------|--------|----------|----|--------|--------|-------|
| rs10847937 | PTB      | C  | A  | 0.176  | 0.038  | 3.20E-06 | 22 | 0.003  | 0.006  | 0.676 |
| rs13434036 | PTB      | T  | G  | -0.446 | 0.097  | 4.02E-06 | 21 | -0.025 | 0.025  | 0.420 |
| rs2027204  | PTB      | A  | G  | 0.159  | 0.034  | 3.05E-06 | 22 | 0.000  | 0.005  | 0.917 |
| rs6708458  | PTB      | G  | A  | 0.272  | 0.058  | 2.29E-06 | 22 | 0.000  | 0.007  | 0.688 |
| rs72738736 | PTB      | T  | G  | 0.157  | 0.035  | 8.09E-06 | 20 | 0.007  | 0.005  | 0.368 |

PTB: pulmonary tuberculosis. EA: effect allele. OA: other allele. EAF: EA frequency. GX: beta-exposure. GX(SE): standard error of GX. GY: beta-outcome. GY(SE): standard error of GY.

**Table S18. Published associations of PTB on TC**

| SNP        | Exposure | EA | OA | GX     | GX(SE) | pval     | F  | GY    | GY(SE) | pval  |
|------------|----------|----|----|--------|--------|----------|----|-------|--------|-------|
| rs10847937 | PTB      | C  | A  | 0.176  | 0.038  | 3.20E-06 | 22 | 0.009 | 0.006  | 0.190 |
| rs13434036 | PTB      | T  | G  | -0.446 | 0.097  | 4.02E-06 | 21 | 0.004 | 0.027  | 0.548 |
| rs2027204  | PTB      | A  | G  | 0.159  | 0.034  | 3.05E-06 | 22 | 0.002 | 0.005  | 0.790 |
| rs6708458  | PTB      | G  | A  | 0.272  | 0.058  | 2.29E-06 | 22 | 0.003 | 0.008  | 0.860 |
| rs72738736 | PTB      | T  | G  | 0.157  | 0.035  | 8.09E-06 | 20 | 0.004 | 0.005  | 0.488 |

PTB: pulmonary tuberculosis. EA: effect allele. OA: other allele. EAF: EA frequency. GX: beta-exposure. GX(SE): standard error of GX. GY: beta-outcome. GY(SE): standard error of GY.

**Table S19. Published associations of PTB on BMI**

| SNP        | Exposure | EA | OA | GX     | GX(SE) | pval     | F  | GY     | GY(SE) | pval  |
|------------|----------|----|----|--------|--------|----------|----|--------|--------|-------|
| rs10847937 | PTB      | C  | A  | 0.176  | 0.038  | 3.20E-06 | 22 | 0.000  | 0.004  | 0.928 |
| rs13434036 | PTB      | T  | G  | -0.446 | 0.097  | 4.02E-06 | 21 | -0.033 | 0.022  | 0.131 |
| rs2027204  | PTB      | A  | G  | 0.159  | 0.034  | 3.05E-06 | 22 | 0.007  | 0.004  | 0.080 |
| rs62201868 | PTB      | A  | G  | -2.155 | 0.487  | 9.75E-06 | 20 | -0.004 | 0.042  | 0.927 |
| rs6708458  | PTB      | G  | A  | 0.272  | 0.058  | 2.29E-06 | 22 | -0.002 | 0.006  | 0.739 |
| rs72738736 | PTB      | T  | G  | 0.157  | 0.035  | 8.09E-06 | 20 | -0.007 | 0.004  | 0.064 |

PTB: pulmonary tuberculosis. EA: effect allele. OA: other allele. EAF: EA frequency. GX: beta-exposure. GX(SE): standard error of GX. GY: beta-outcome. GY(SE): standard error of GY.

**Table S20. Published associations of PTB on WHR**

| SNP        | Exposure | EA | OA | GX     | GX(SE) | pval     | F  | GY     | GY(SE) | pval  |
|------------|----------|----|----|--------|--------|----------|----|--------|--------|-------|
| rs10847937 | PTB      | C  | A  | 0.176  | 0.038  | 3.20E-06 | 22 | 0.005  | 0.005  | 0.270 |
| rs13434036 | PTB      | T  | G  | -0.446 | 0.097  | 4.02E-06 | 21 | -0.056 | 0.024  | 0.020 |
| rs2027204  | PTB      | A  | G  | 0.159  | 0.034  | 3.05E-06 | 22 | 0.004  | 0.004  | 0.340 |
| rs6708458  | PTB      | G  | A  | 0.272  | 0.058  | 2.29E-06 | 22 | -0.009 | 0.006  | 0.170 |
| rs72738736 | PTB      | T  | G  | 0.157  | 0.035  | 8.09E-06 | 20 | -0.001 | 0.004  | 0.890 |

PTB: pulmonary tuberculosis. EA: effect allele. OA: other allele. EAF: EA frequency. GX: beta-exposure. GX(SE): standard error of GX. GY: beta-outcome. GY(SE): standard error of GY.

Figure S1. T1DM-associated SNPs with risk of PTB

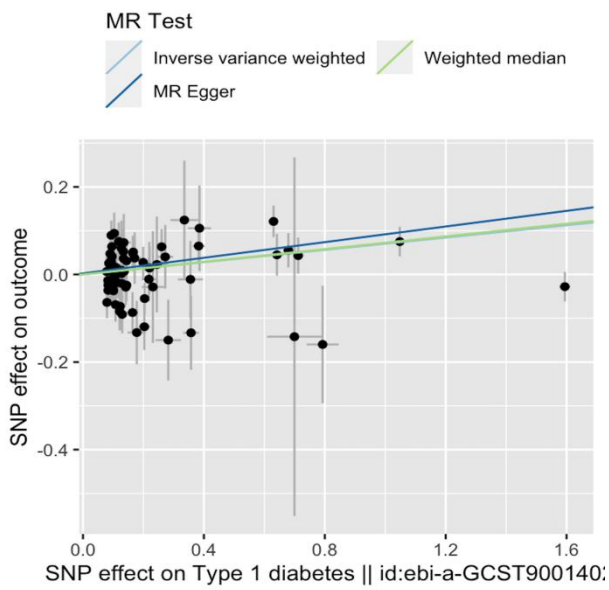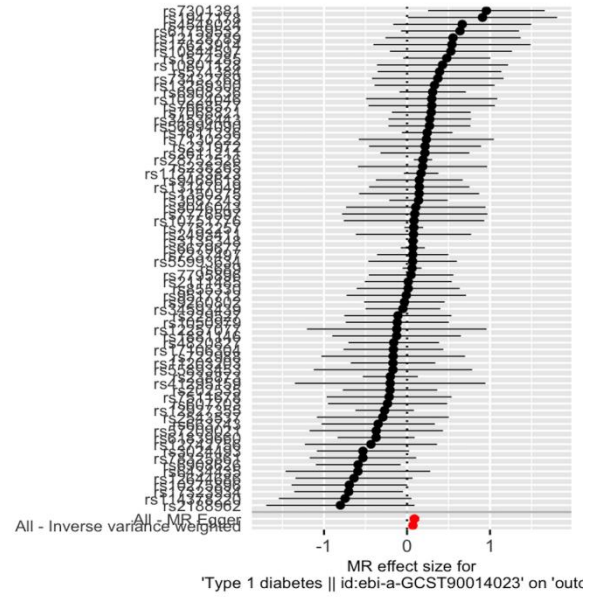

A. Scatter plot of causal effect of T1DM on PTB

B. Forest plot of causal effect of T1DM on PTB

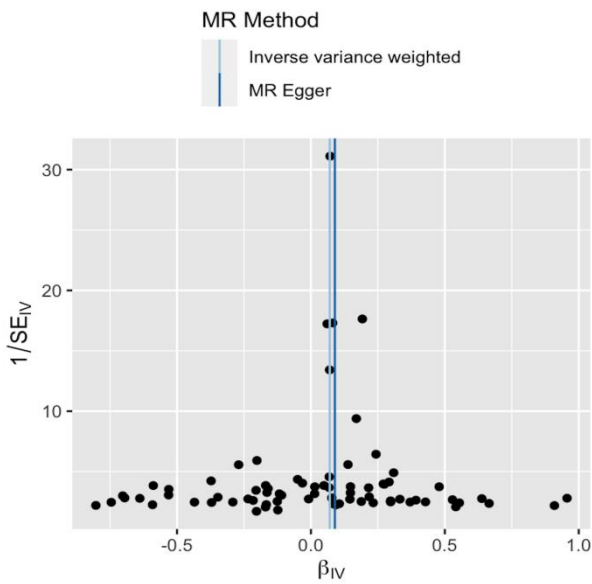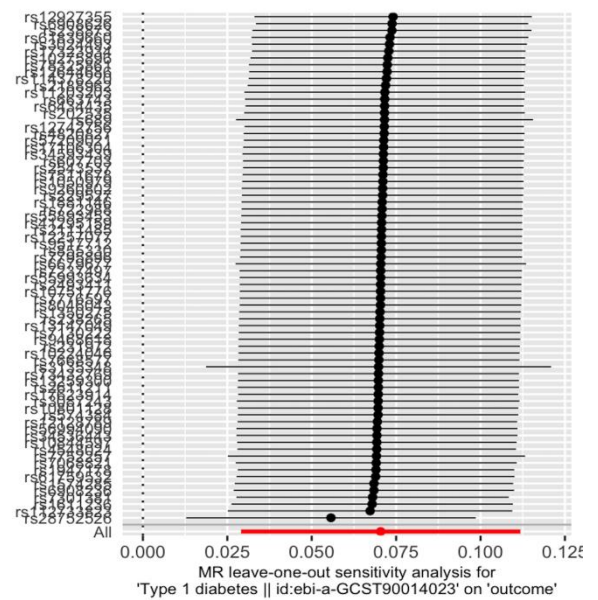

C. Funnel plot of causal effect of T1DM on PTB

D. Leave-one-out analysis of T1DM on PTB

**Figure S2. PTB-associated SNPs with risk of T1DM**

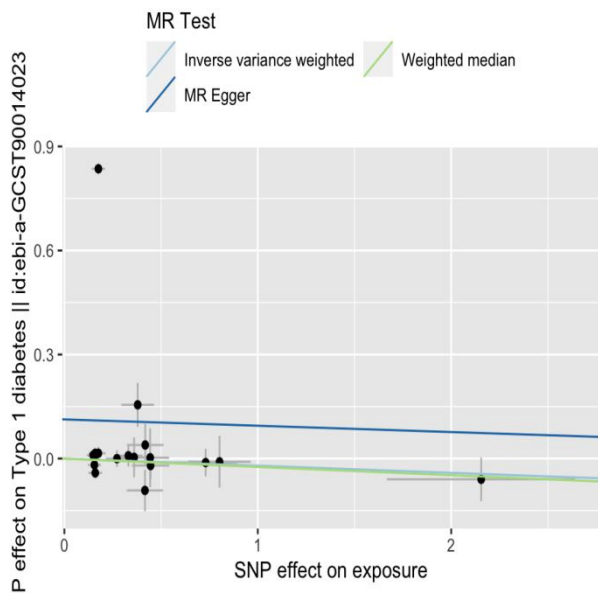

A. Scatter plot of causal effect of PTB on T1DM

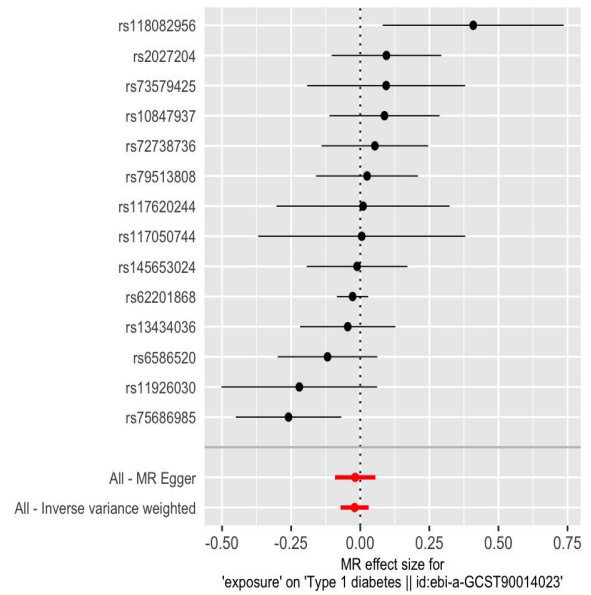

B. Forest plot of causal effect of PTB on T1DM

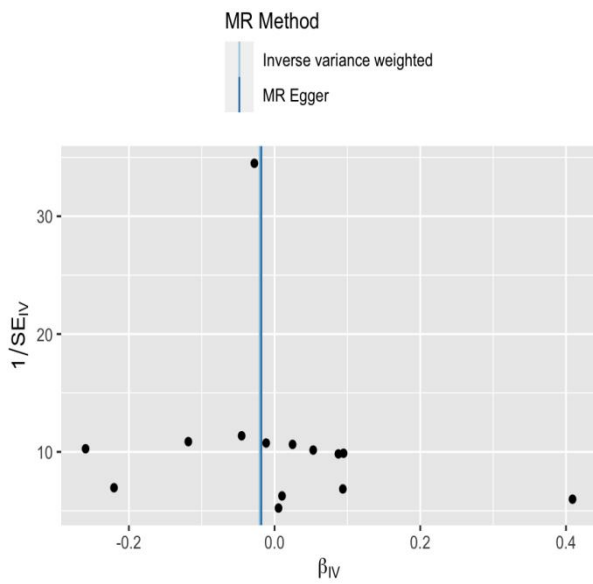

C. Funnel plot of causal effect of PTB on T1DM

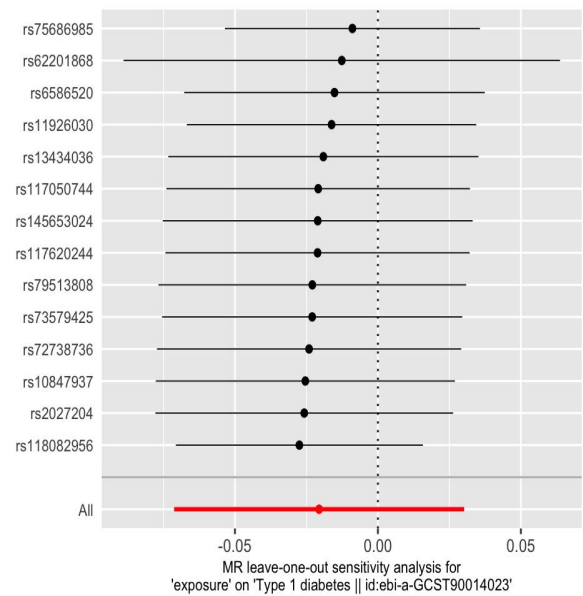

D. Leave-one-out analysis of PTB on T1DM

**Figure S3. FBG-associated SNPs with risk of PTB**

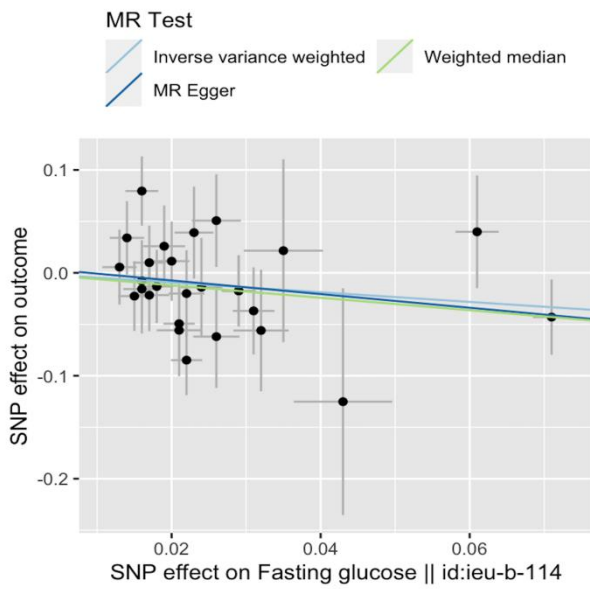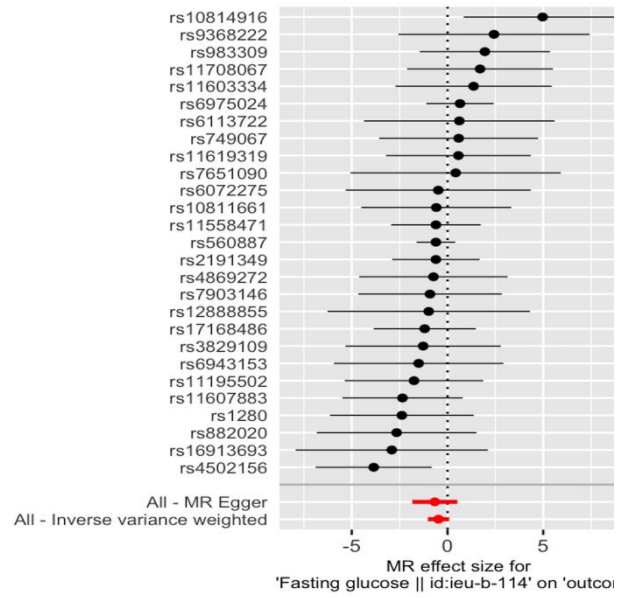

A. Scatter plot of causal effect of FBG on PTB

B. Forest plot of causal effect of FBG on PTB

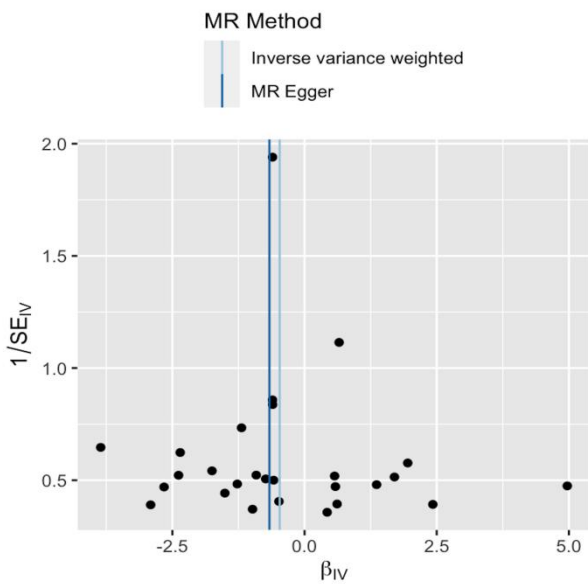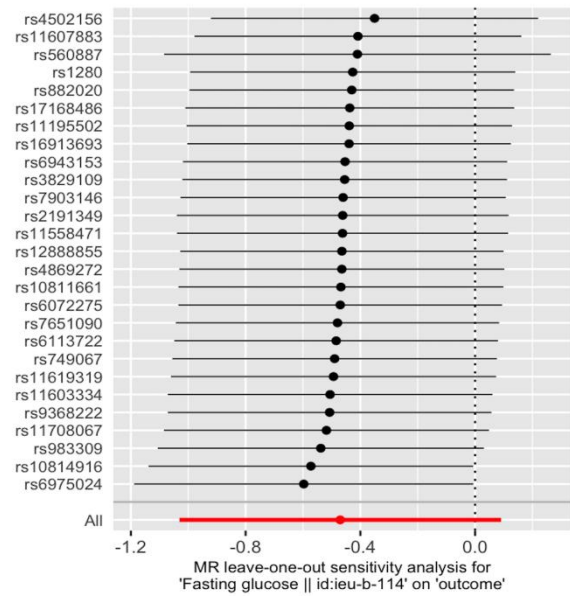

C. Funnel plot of causal effect of FBG on PTB

D. Leave-one-out analysis of FBG on PTB



**Figure S4. HAb1c-associated SNPs with risk of PTB**

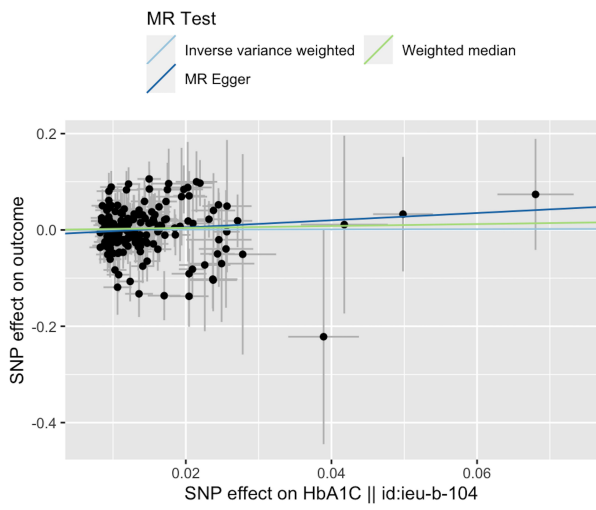

A. Scatter plot of causal effect of HAb1c on PTB

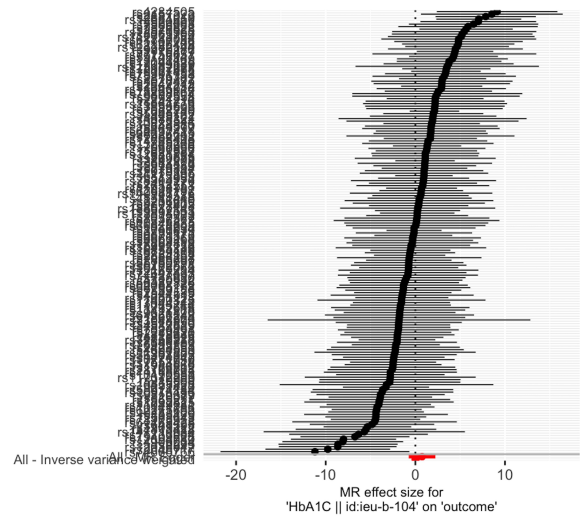

B. Forest plot of causal effect of HAb1c on PTB

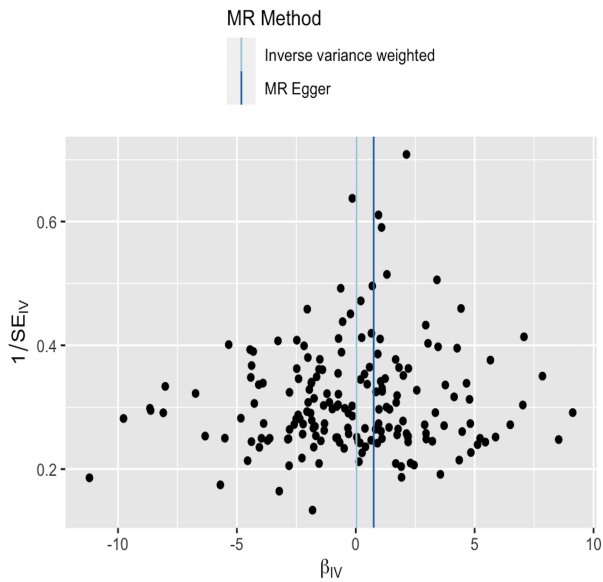

C. Funnel plot of causal effect of HAb1c on PTB

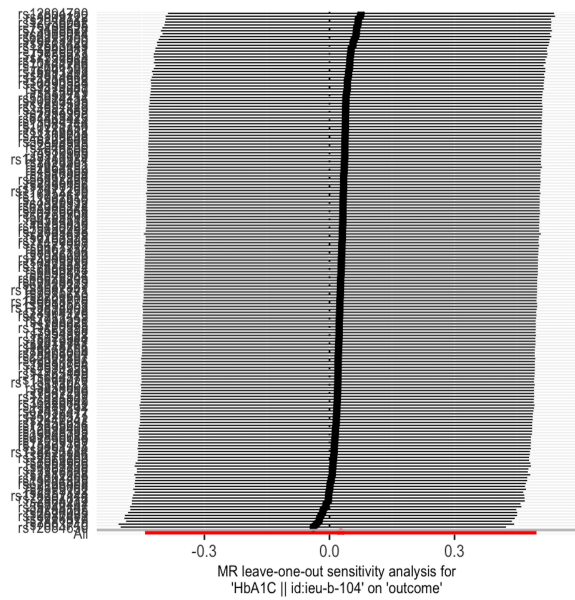

D. Leave-one-out analysis of HAb1c on PTB

**Figure S5. FI-associated SNPs with risk of PTB**

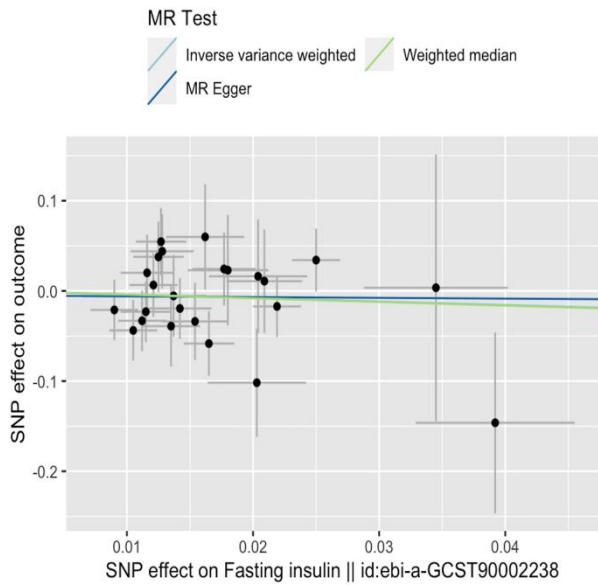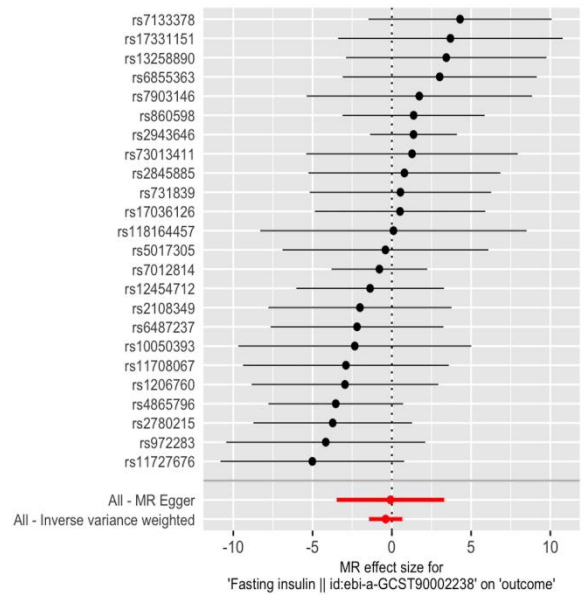

A. Scatter plot of causal effect of FI on PTB

B. Forest plot of causal effect of FI on PTB

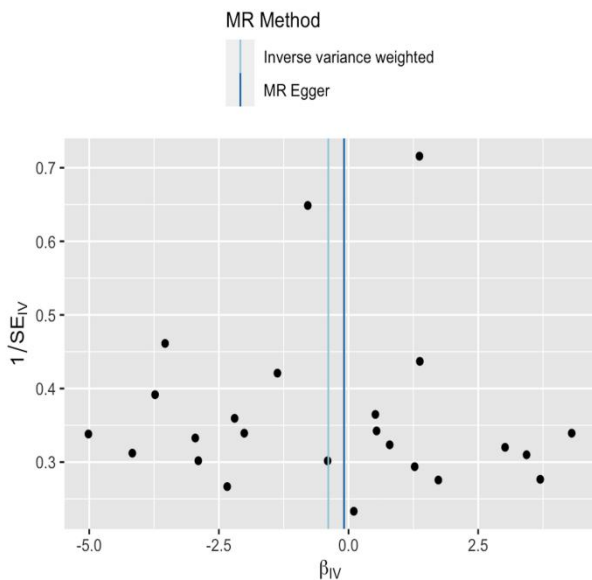

C. Funnel plot of causal effect of FI on PTB

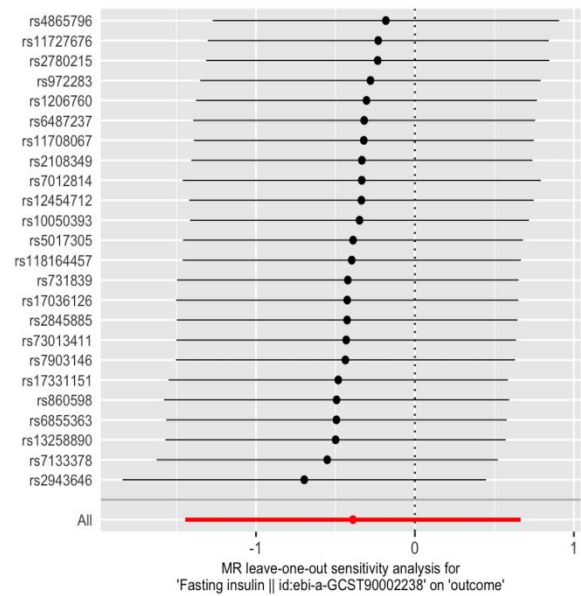

D. Leave-one-out analysis of FI on PTB

**Figure S6. LDL-associated SNPs with risk of PTB**

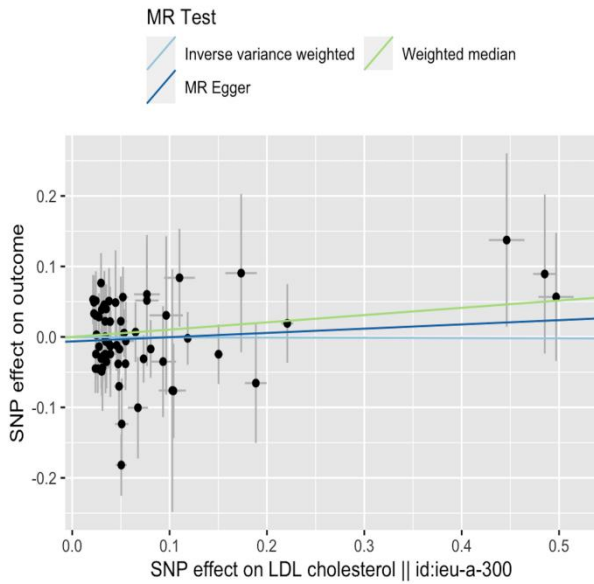

A. Scatter plot of causal effect of LDL on PTB

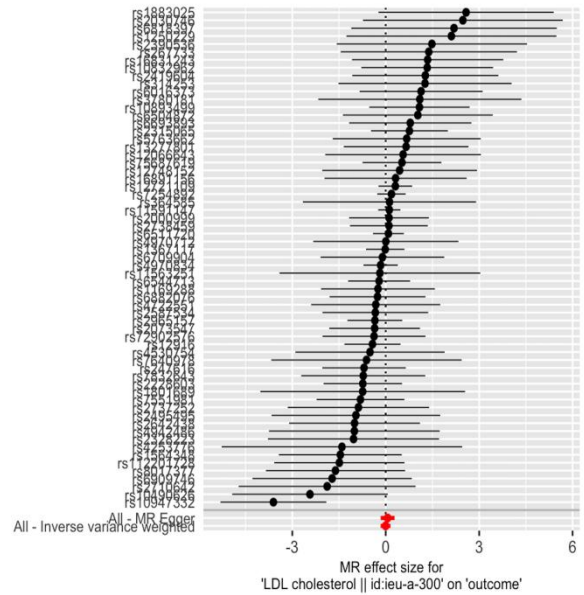

B. Forest plot of causal effect of LDL on PTB

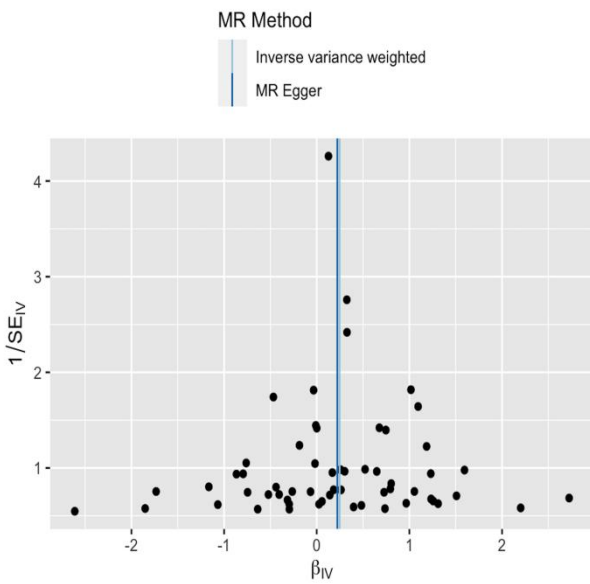

C. Funnel plot of causal effect of LDL on PTB

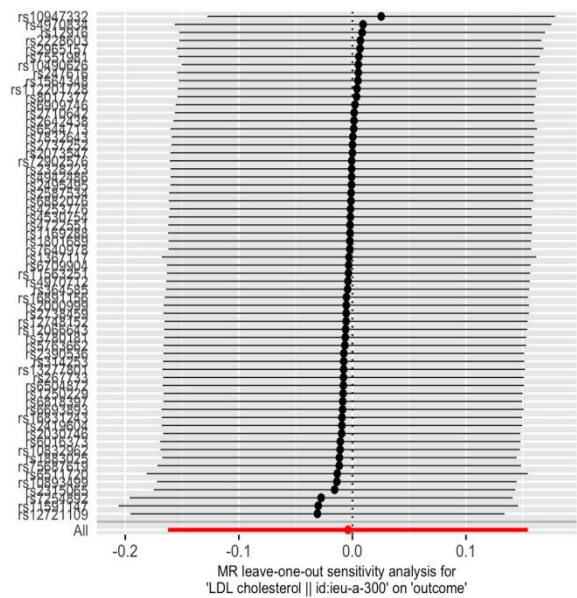

D. Leave-one-out analysis of LDL on PTB

**Figure S7. HDL-associated SNPs with risk of PTB**

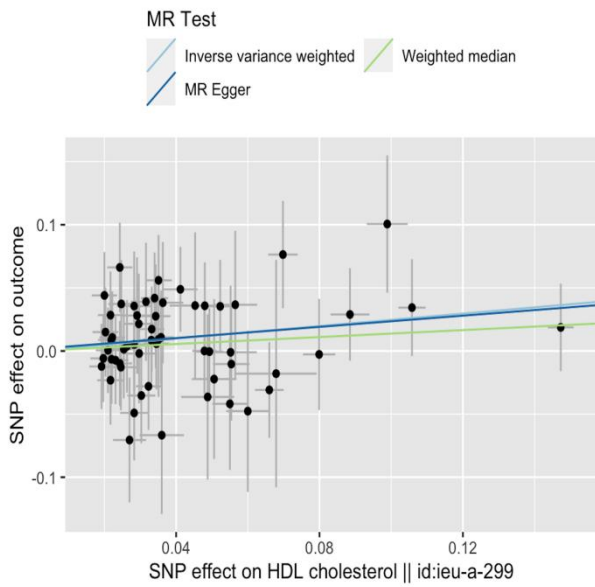

A. Scatter plot of causal effect of HDL on PTB

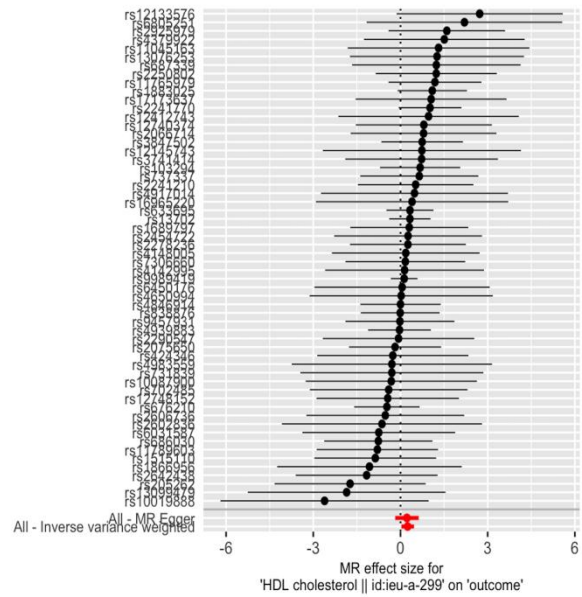

B. Forest plot of causal effect of HDL on PTB

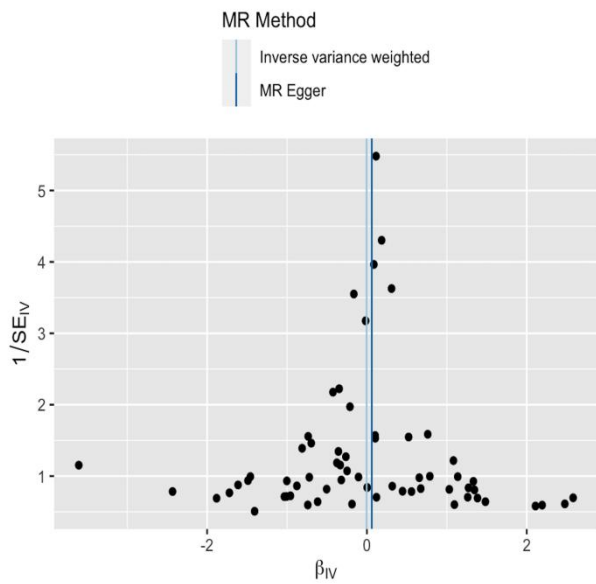

C. Funnel plot of causal effect of HDL on PTB

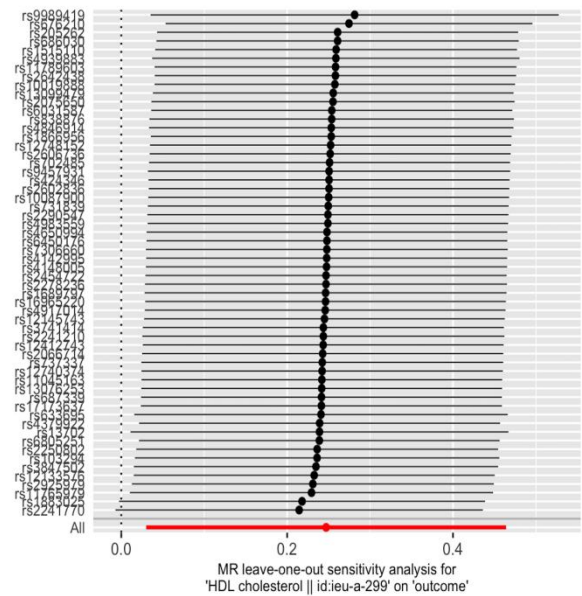

D. Leave-one-out analysis of HDL on PTB

**Figure S8. TG-associated SNPs with risk of PTB**

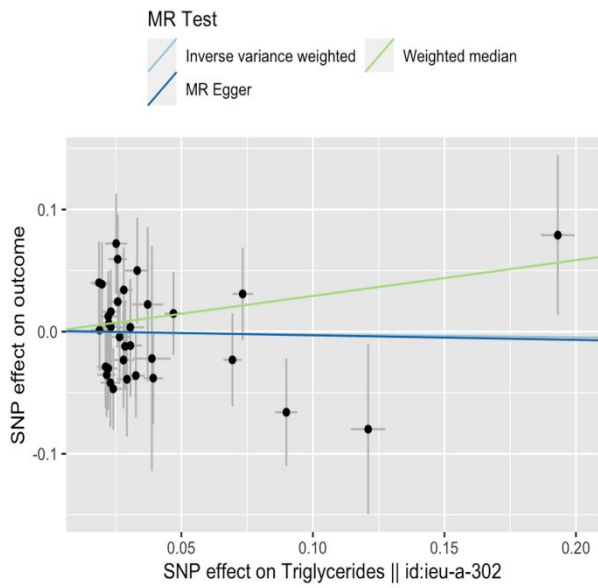

A. Scatter plot of causal effect of TG on PTB

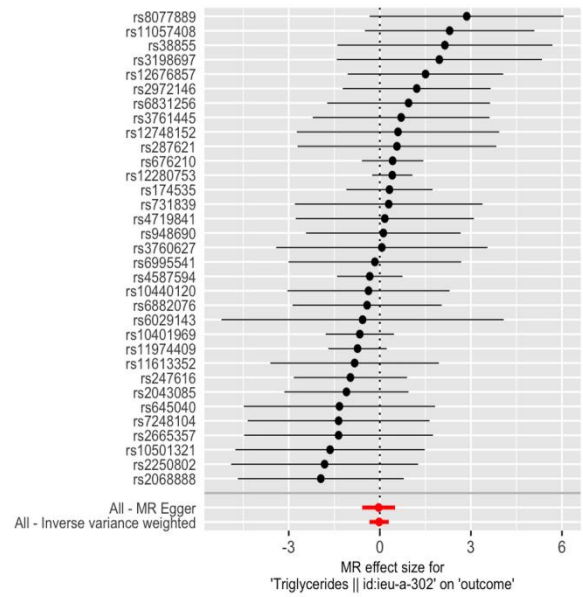

B. Forest plot of causal effect of TG on PTB

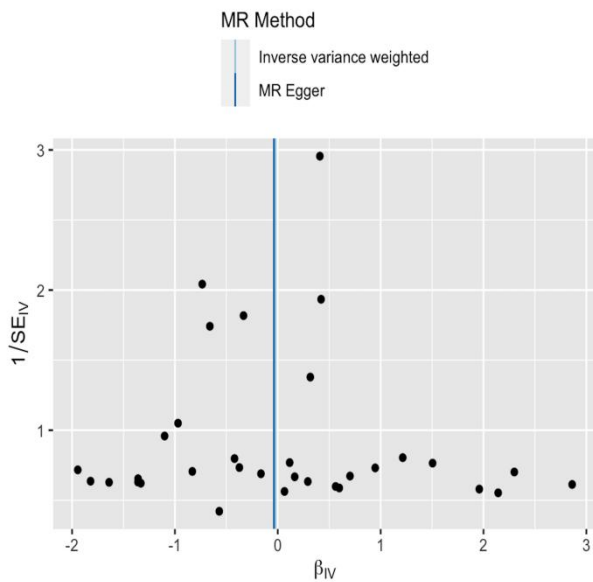

C. Funnel plot of causal effect of TG on PTB

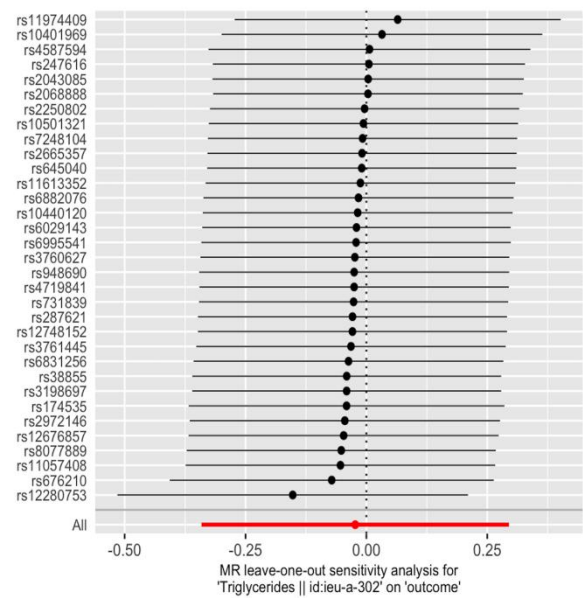

D. Leave-one-out analysis of TG on PTB

**Figure S9. TC-associated SNPs with risk of PTB**

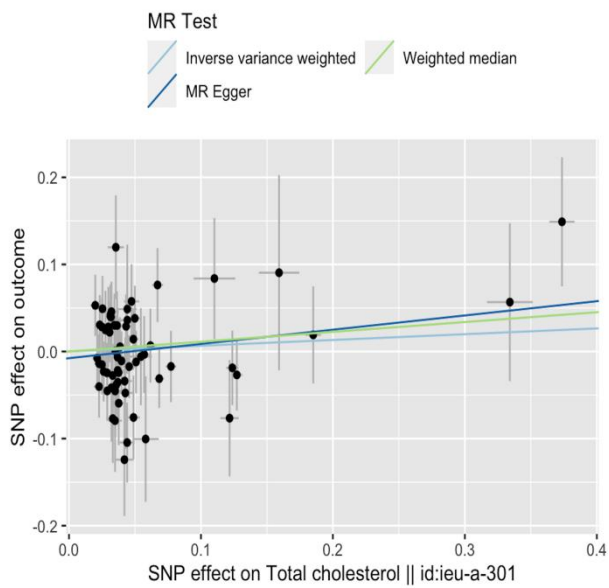

A. Scatter plot of causal effect of TC on PTB

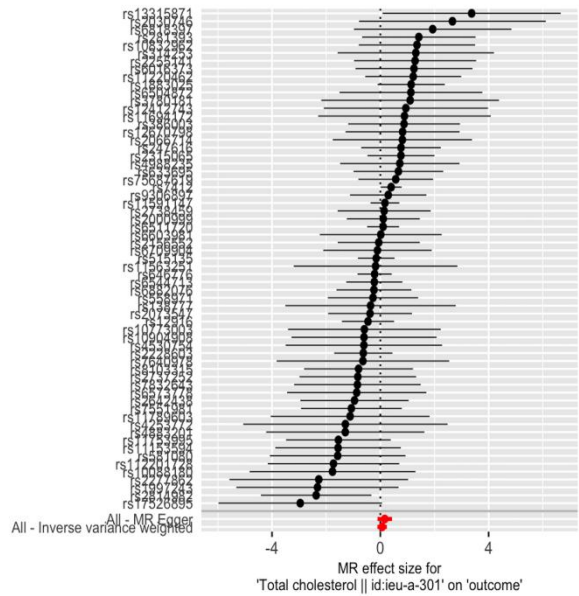

B. Forest plot of causal effect of TC on PTB

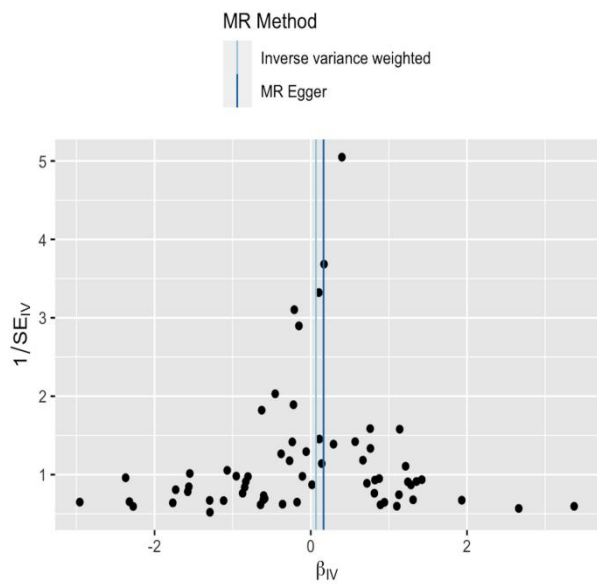

C. Funnel plot of causal effect of TC on PTB

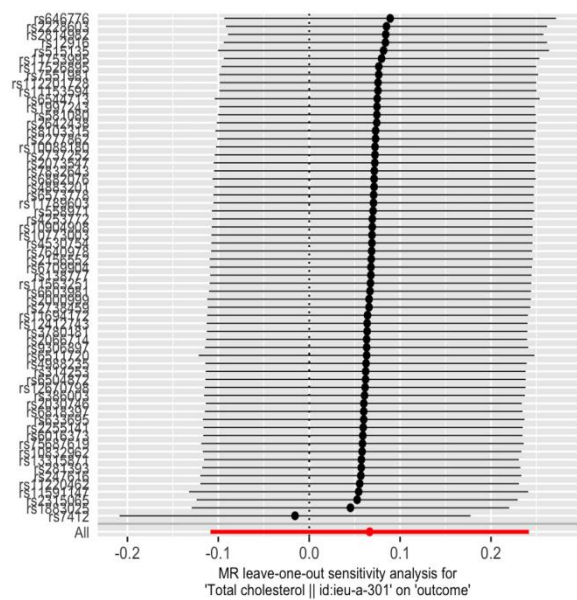

D. Leave-one-out analysis of TC on PTB



**Figure S10. BMI-associated SNPs with risk of PTB**

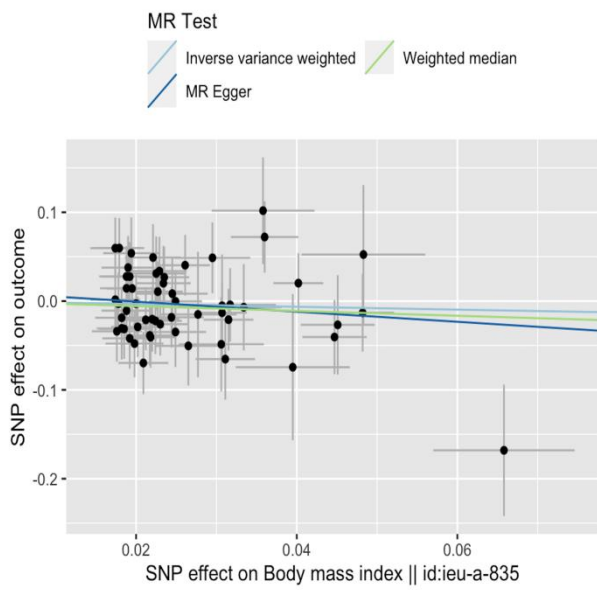

A. Scatter plot of causal effect of BMI on PTB

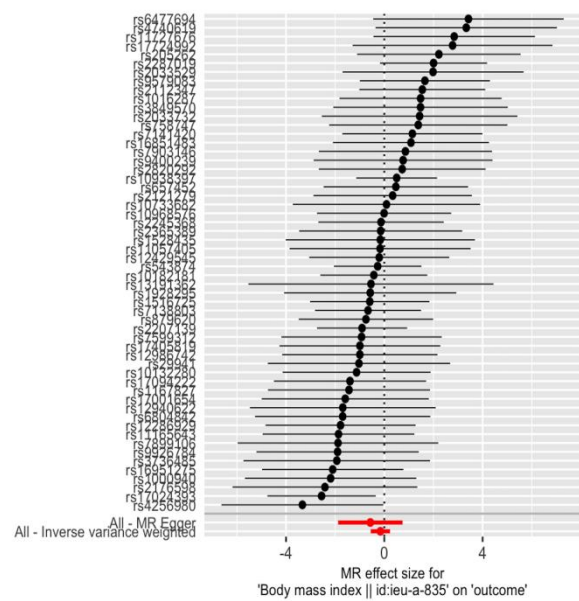

B. Forest plot of causal effect of BMI on PTB

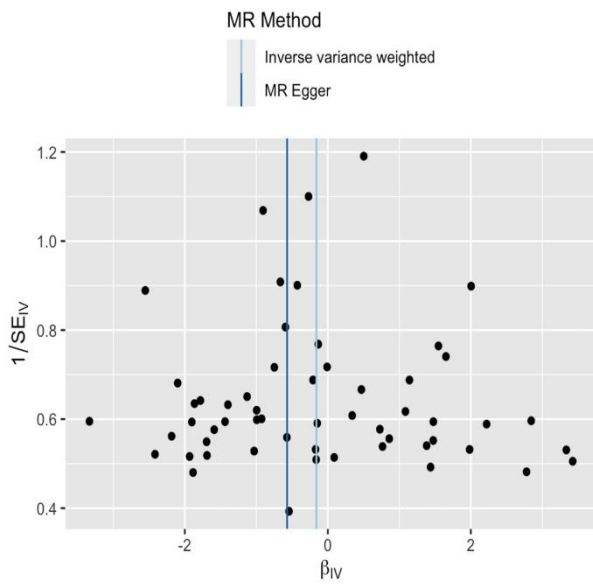

C. Funnel plot of causal effect of BMI on PTB

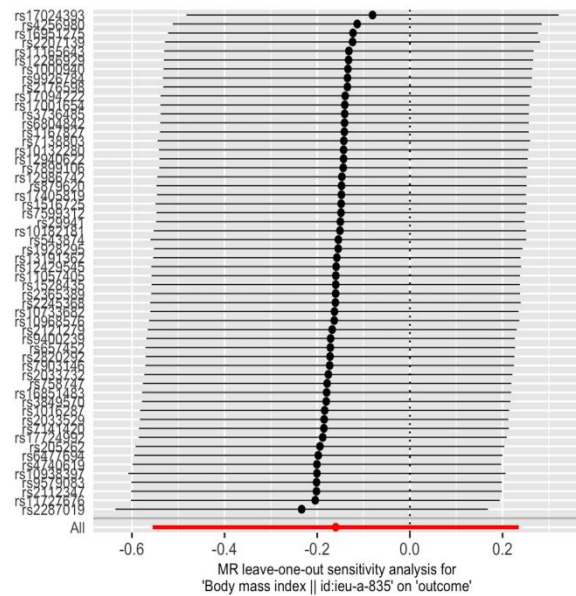

D. Leave-one-out analysis of BMI on PTB

**Figure S11. WHR-associated SNPs with risk of PTB**

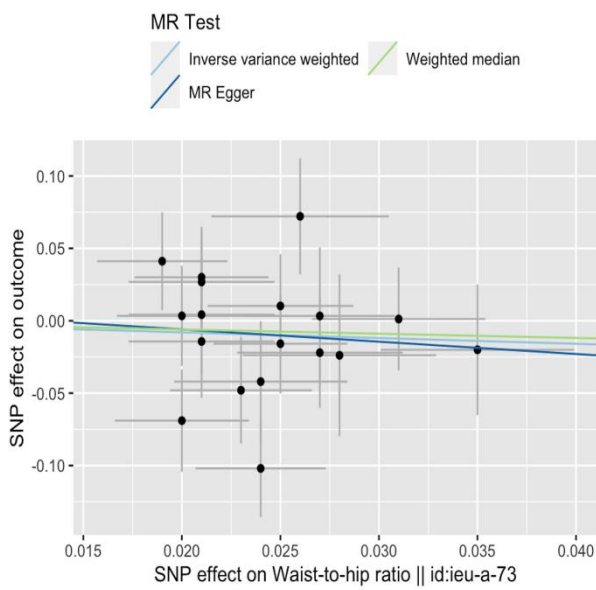

A. Scatter plot of causal effect of WHR on PTB

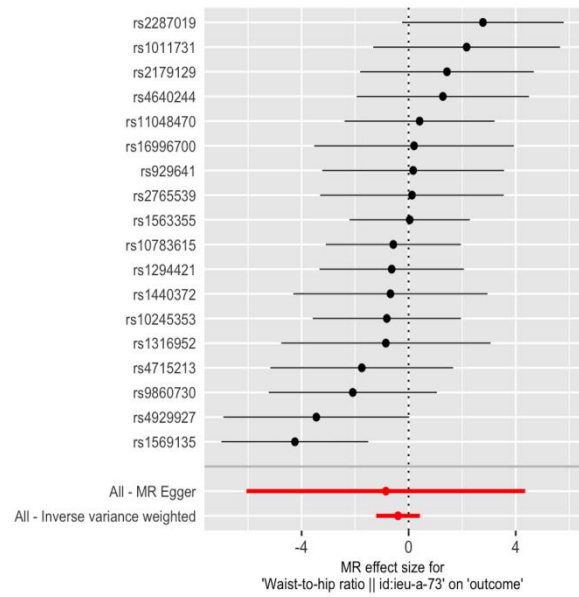

B. Forest plot of causal effect of WHR on PTB

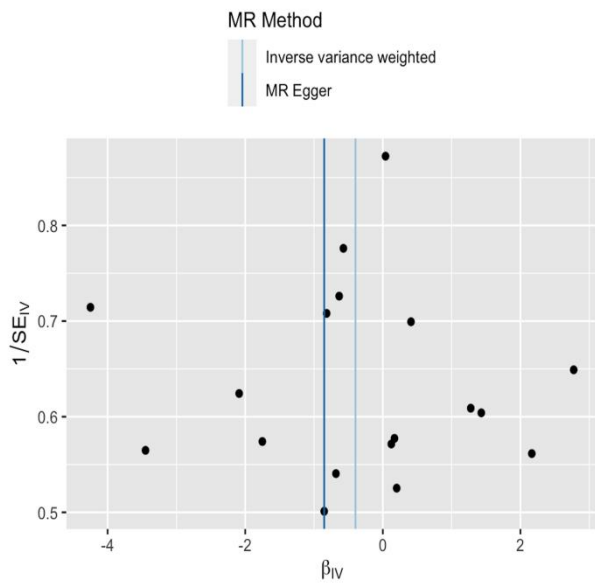

C. Funnel plot of causal effect of WHR on PTB

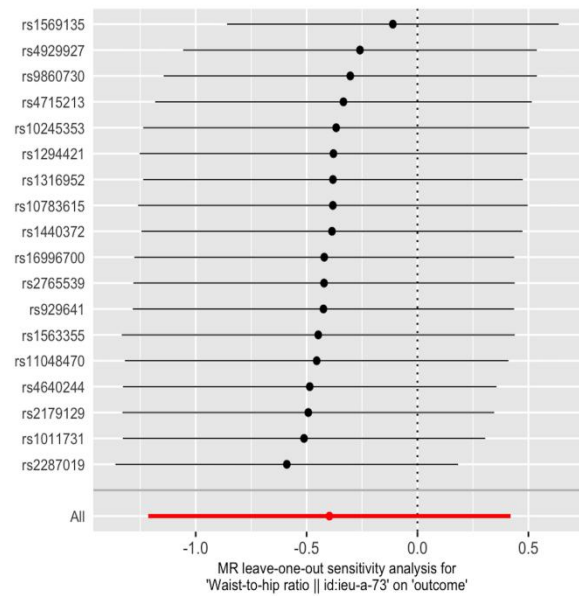

D. Leave-one-out analysis of WHR on PTB



**Figure S12. PTB-associated SNPs with risk of HbA1c**

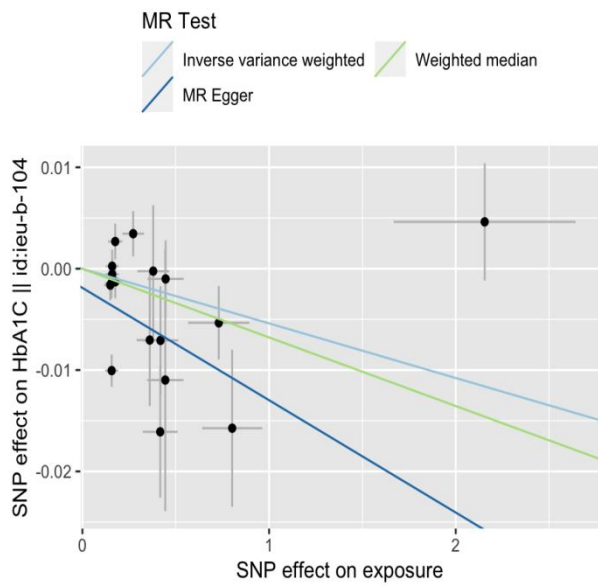

**A. Scatter plot of causal effect of PTB on HbA1c**

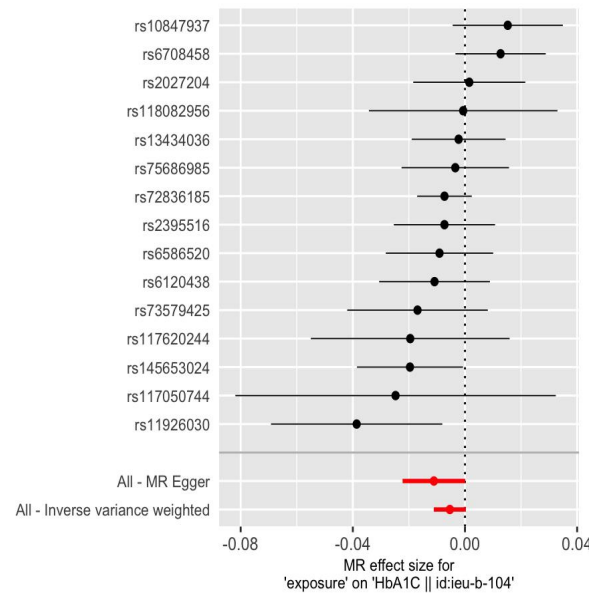

**B. Forest plot of causal effect of PTB on HbA1c**

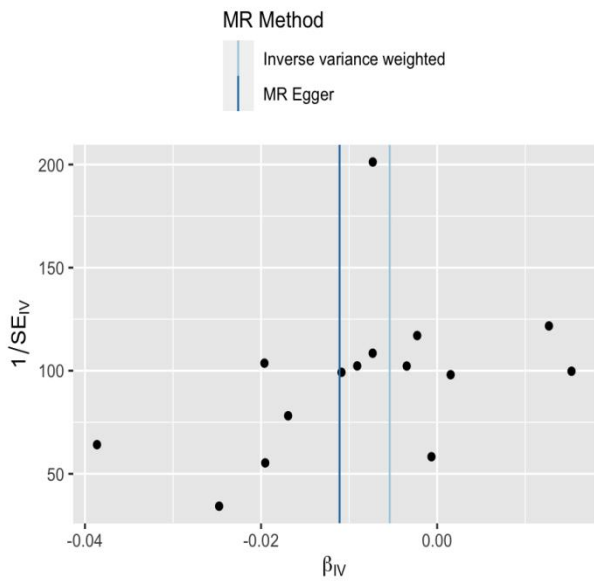

**C. Funnel plot of causal effect of PTB on HbA1c**

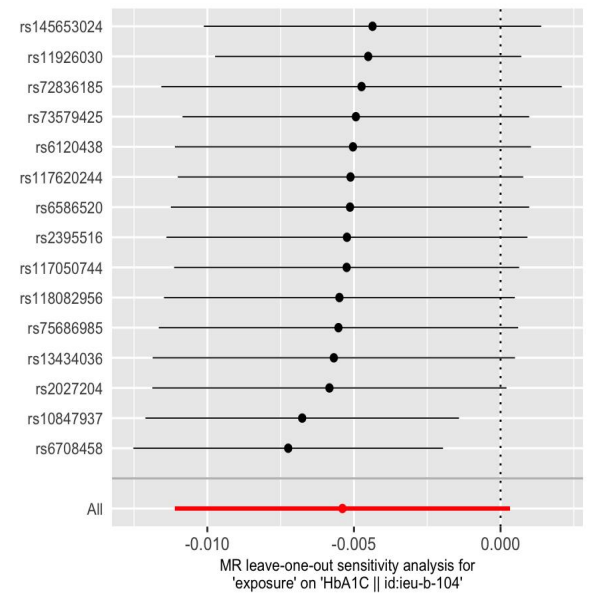

**D. Leave-one-out analysis of PTB on HbA1c**

**Figure S13. PTB-associated SNPs with risk of FI**

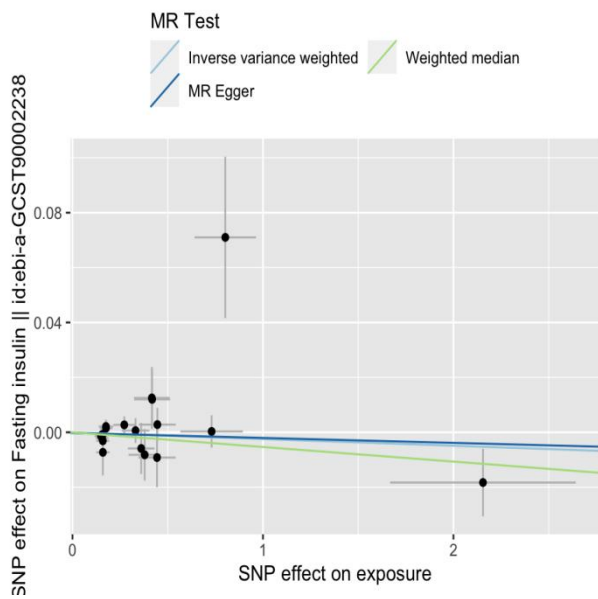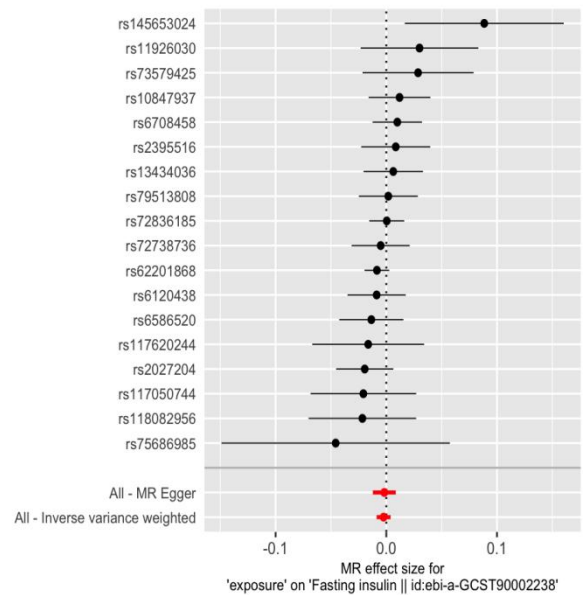

**A. Scatter plot of causal effect of PTB on FI**

**B. Forest plot of causal effect of PTB on FI**

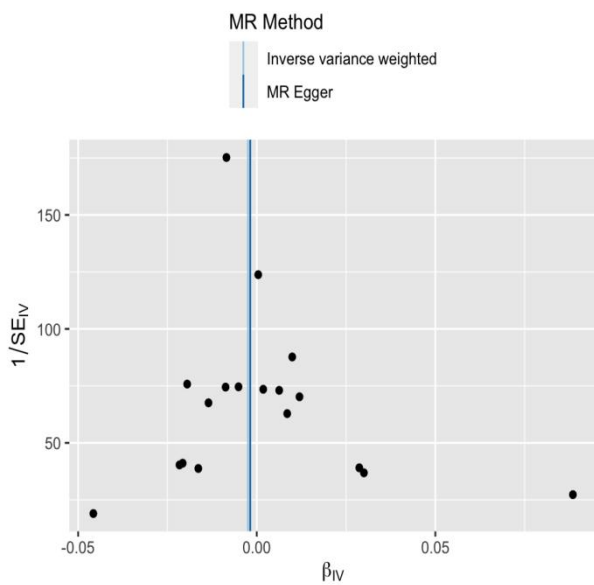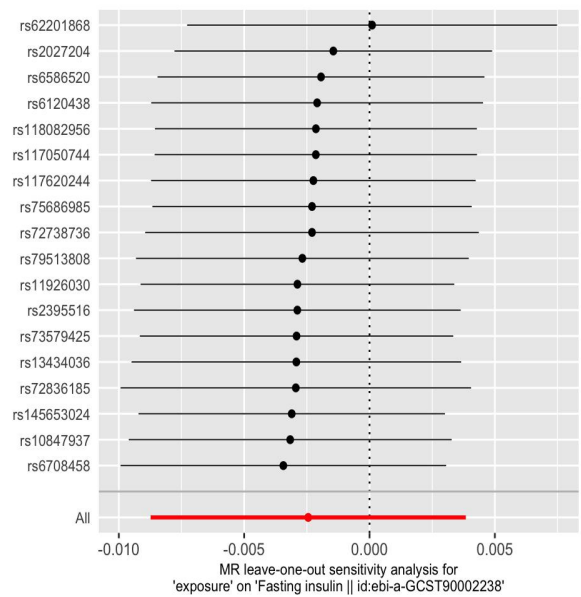

**C. Funnel plot of causal effect of PTB on FI**

**D. Leave-one-out analysis of PTB on FI**

**Figure S14. PTB-associated SNPs with risk of LDL-C**

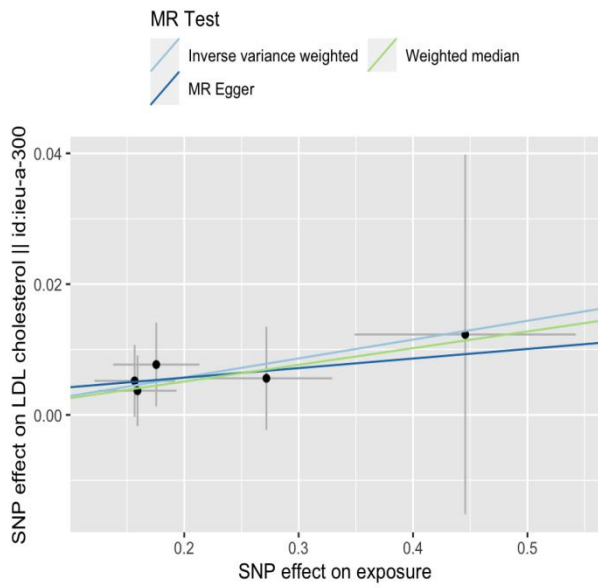

A. Scatter plot of causal effect of PTB on LDL-C

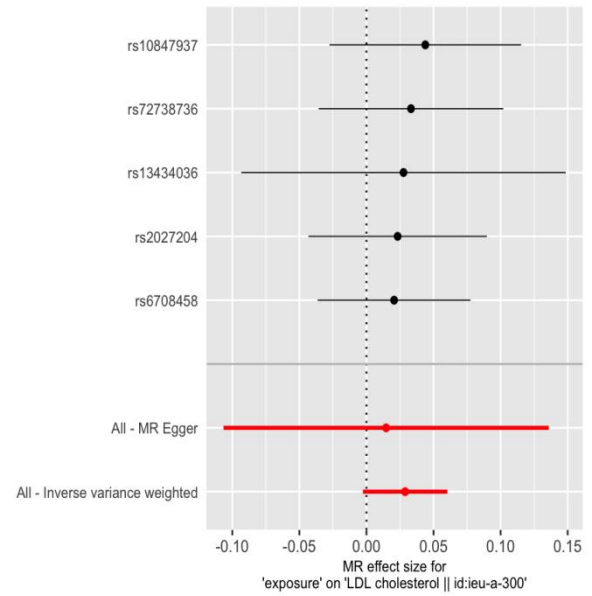

B. Forest plot of causal effect of PTB on LDL-C

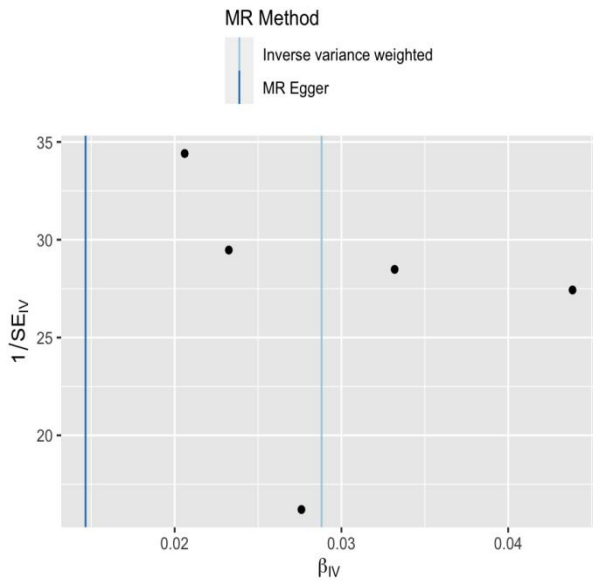

C. Funnel plot of causal effect of PTB on LDL-C

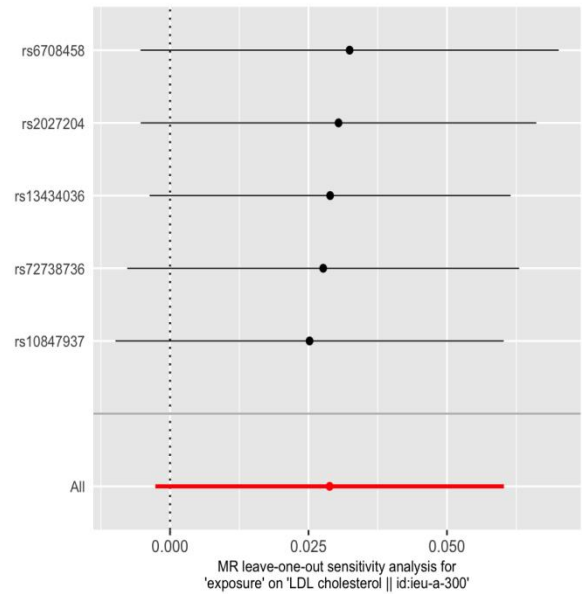

D. Leave-one-out analysis of PTB on LDL-C

**Figure S15. PTB-associated SNPs with risk of HDL-C**

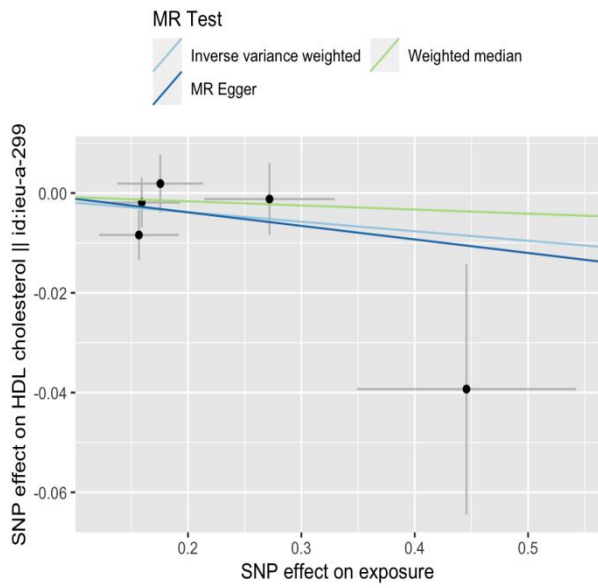

A. Scatter plot of causal effect of PTB on HDL-C

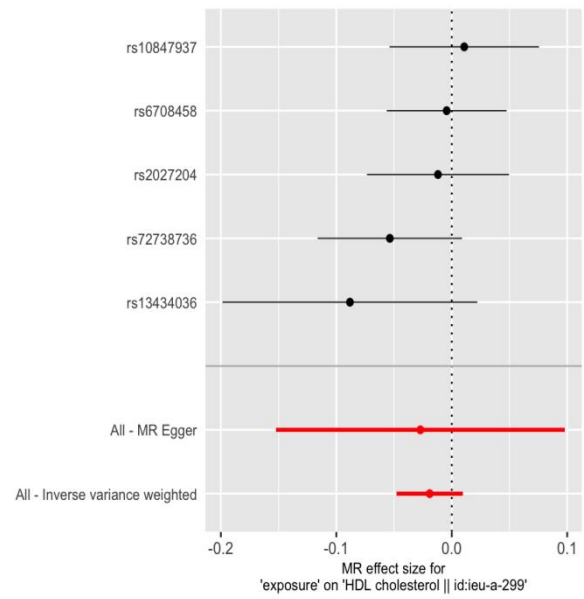

B. Forest plot of causal effect of PTB on HDL-C

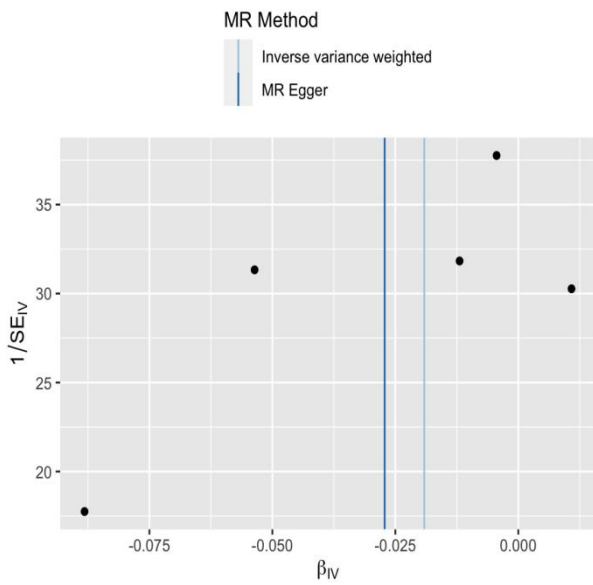

C. Funnel plot of causal effect of PTB on HDL-C

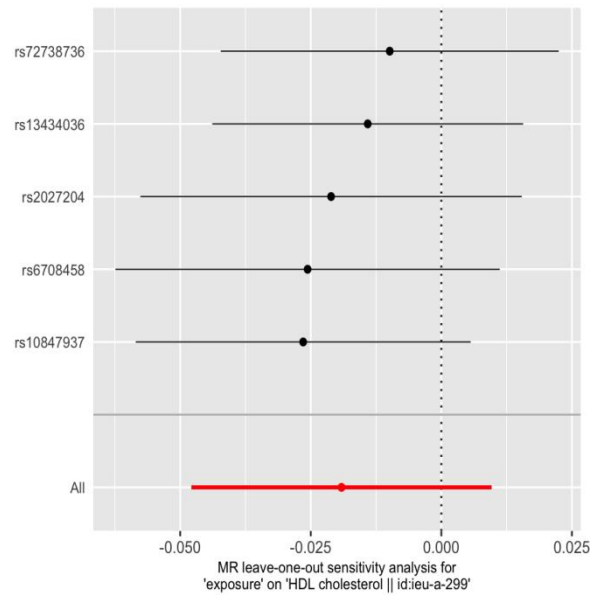

D. Leave-one-out analysis of PTB on HDL-C

**Figure S16. PTB-associated SNPs with risk of TG**

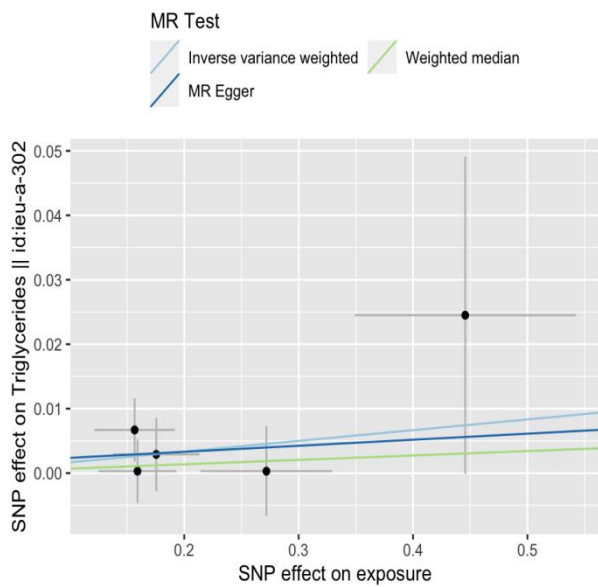

A. Scatter plot of causal effect of PTB on TG

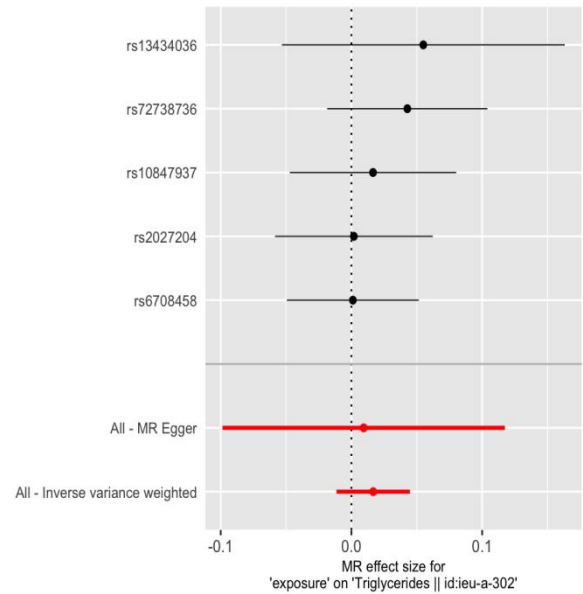

B. Forest plot of causal effect of PTB on TG

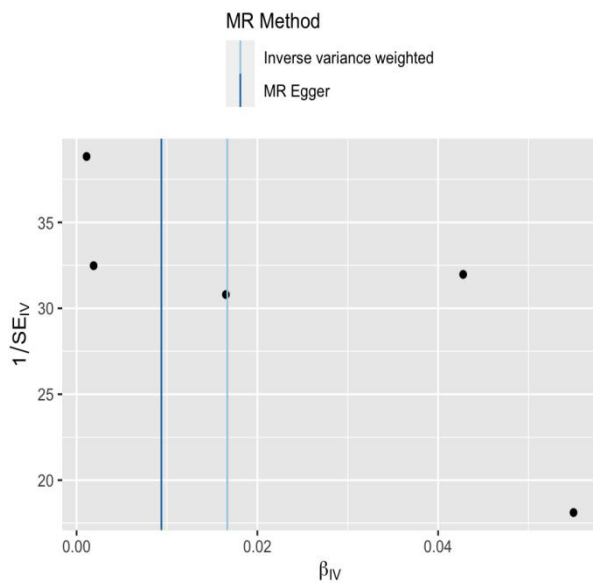

C. Funnel plot of causal effect of PTB on TG

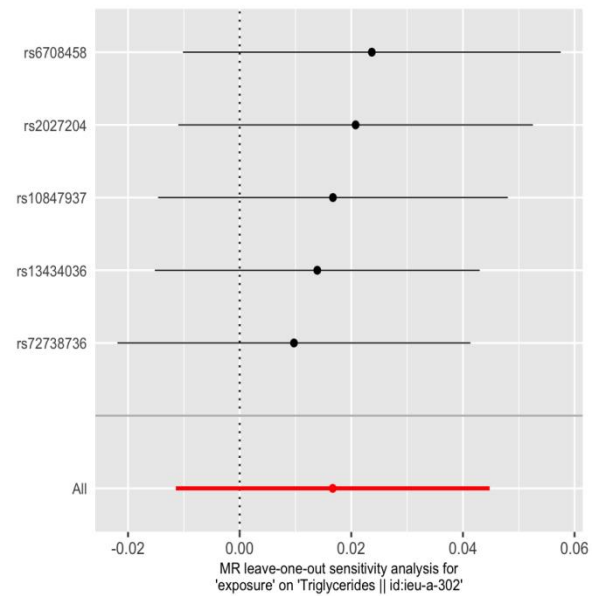

D. Leave-one-out analysis of PTB on TG

**Figure S17. PTB-associated SNPs with risk of TC**

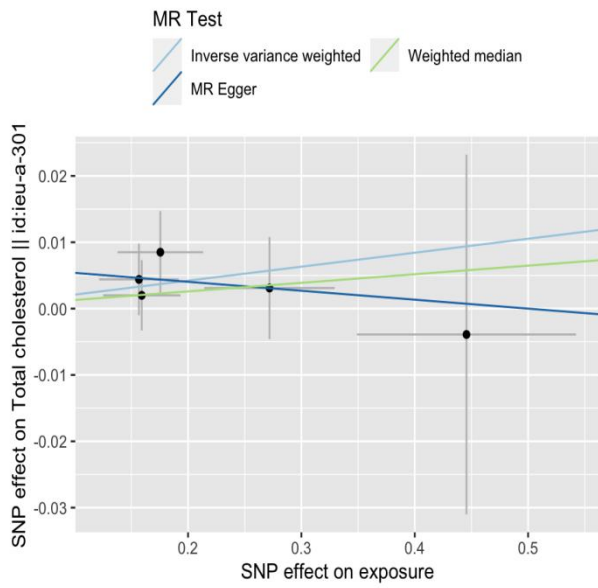

A. Scatter plot of causal effect of PTB on TC

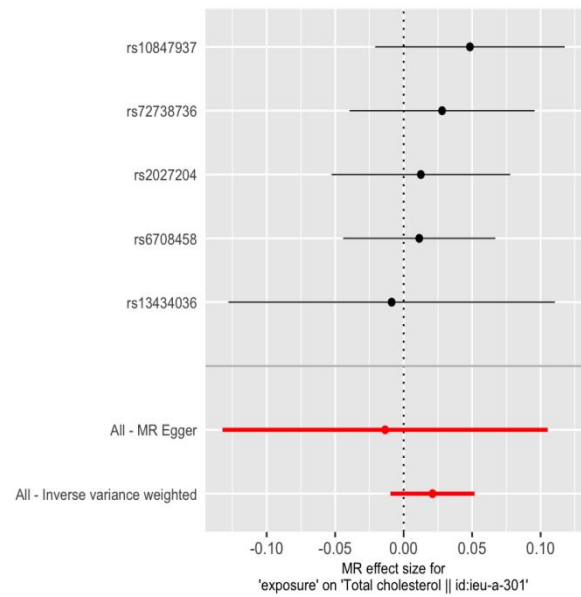

B. Forest plot of causal effect of PTB on TC

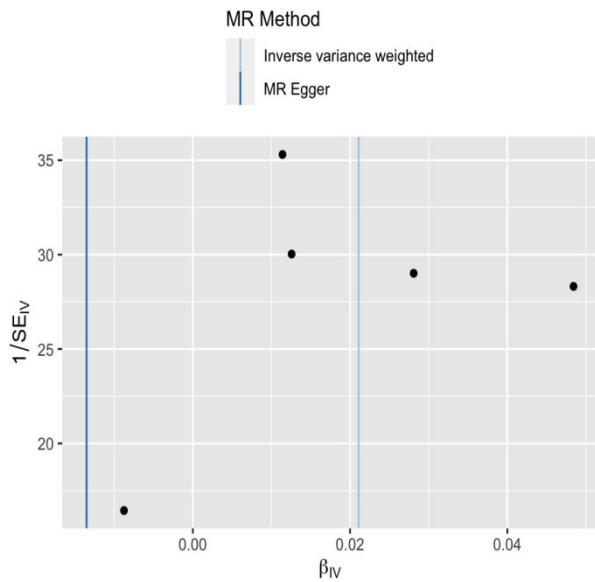

C. Funnel plot of causal effect of PTB on TC

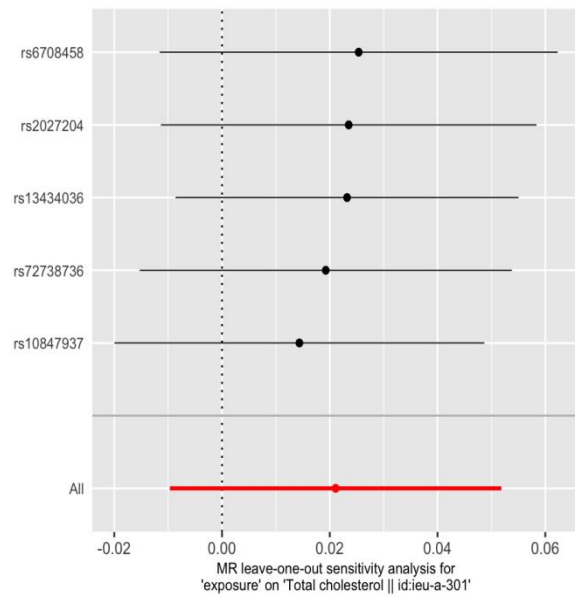

D. Leave-one-out analysis of PTB on TC

**Figure S18. PTB-associated SNPs with risk of BMI**

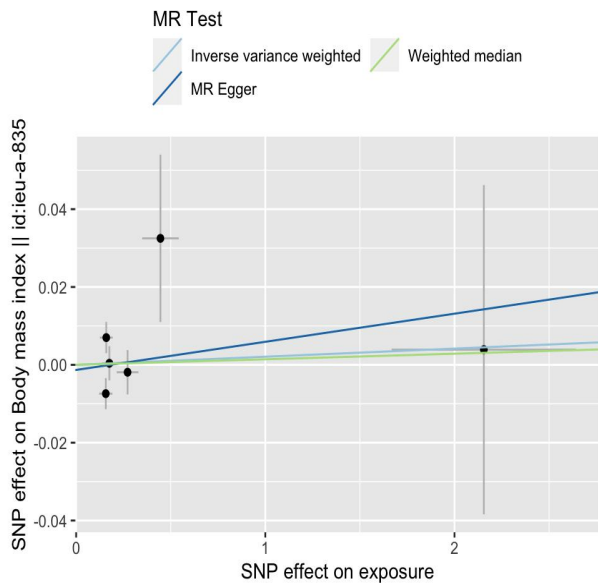

A. Scatter plot of causal effect of PTB on BMI

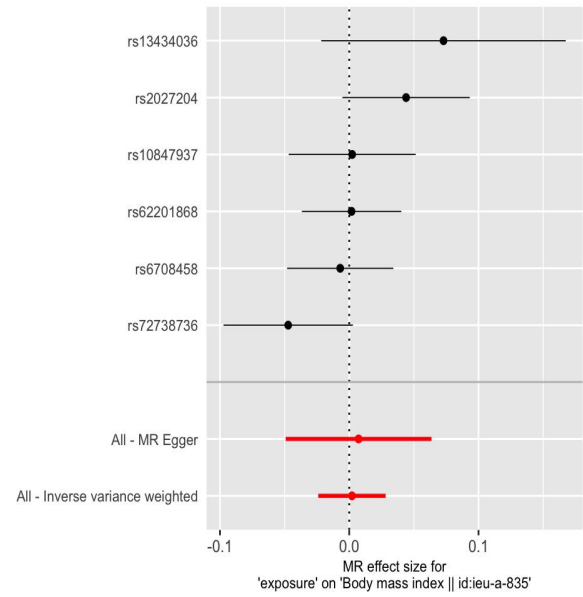

B. Forest plot of causal effect of PTB on BMI

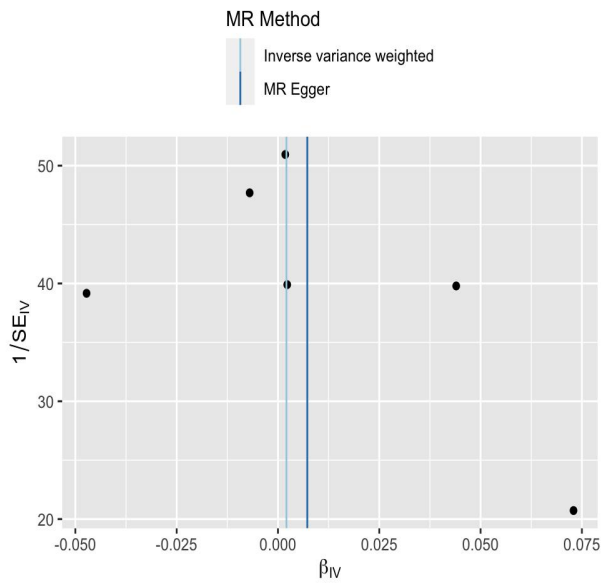

C. Funnel plot of causal effect of PTB on BMI

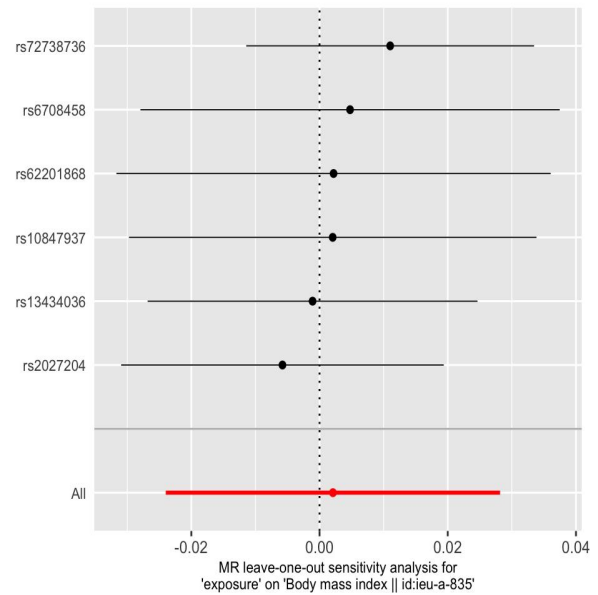

D. Leave-one-out analysis of PTB on BMI

**Figure S19. PTB-associated SNPs with risk of WHR**

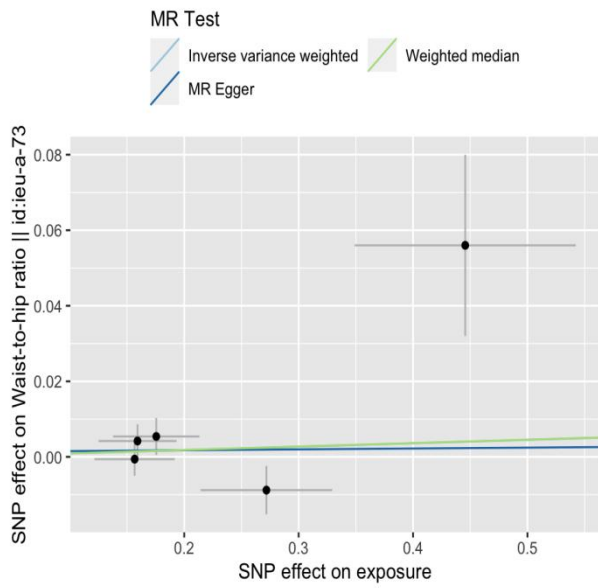

A. Scatter plot of causal effect of PTB on WHR

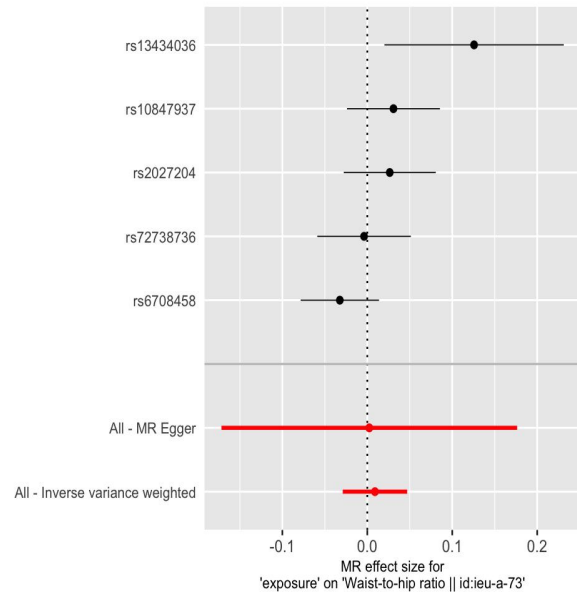

B. Forest plot of causal effect of PTB on WHR

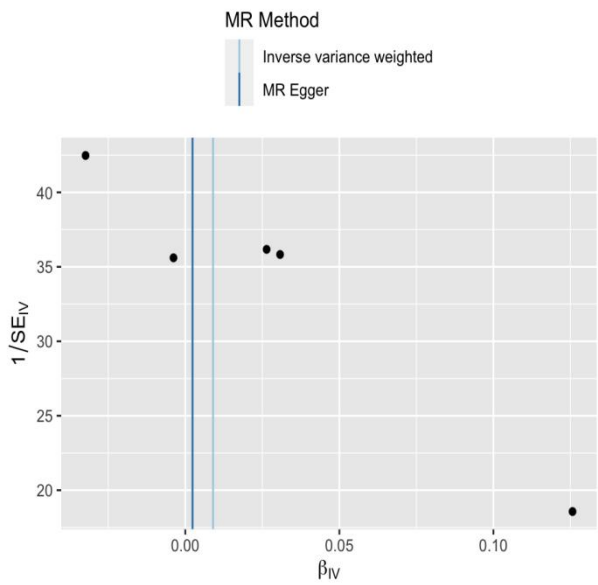

C. Funnel plot of causal effect of PTB on WHR

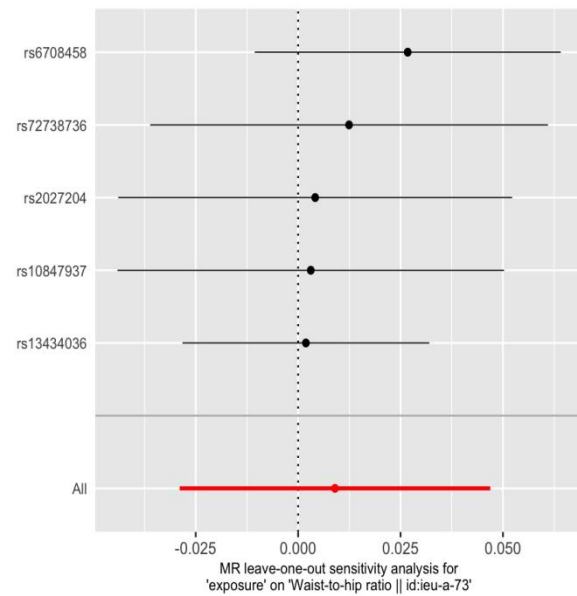

D. Leave-one-out analysis of PTB on WHR
